# Supplementary material for: The evolution of future Antarctic surface melt using PISM-dEBM-simple
Source: Copernicus journal article supplement (doi:10.5194/tc-2022-249), 2023-01-09
Supplement: Supplementary file [file tc-2022-249-AC2-supplement.pdf]

Author's response to referee comments for  
*"The evolution of future Antarctic surface melt  
using PISM-dEBM-simple"*

by J. Garbe et al., The Cryosphere Discuss., 2023  
(manuscript no. TC-2022-249)

Dear Michiel van den Broeke,

Thank you once again for handling the editing process of our manuscript. We have addressed all comments made by the referees and have made a conscious and thorough effort to implement all their suggestions in the revised version of our manuscript. The reviews contributed considerably to the improvement of our manuscript for which we are very grateful.

In our revision of the manuscript, we particularly addressed the following major issues raised by the referees:

1. **Mask mismatch:** Based on the 3rd major comment by Referee #1, we have decided to re-do the model calibration using the observed (instead of PISM's) ice-sheet topography to overcome the inconsistencies between the surface temperature / melt rates and the topography in areas where insolation-driven melt is relevant. This also required re-running all simulations (incl. the SSP5 projection + sensitivity ensemble and the long-term commitment runs). The new calibration results in slightly different best-fit parameters and model results, showing a considerable improvement in projected 2100 melt volume compared to RACMO (Fig. 5), as well as a better match with contemporary melt patterns from RACMO (Figs. 1 and 2). All main conclusions of the paper remain unaffected.
2. **Model evaluation:** We now have added a thorough comparison with observation-derived melt estimates (QuikSCAT) for dEBM-simple as well as for RACMO (incl. 2 additional supplementary figures), have strengthened the justification of RACMO being used for the calibration and performance evaluation, and added a discussion of its limitations.
3. **Comparison to PDD:** We have reemphasized that the main goal of the study is not to denigrate the PDD approach, but instead to conceptually show that in principle the more physically based dEBM approach is capable of replacing the traditionally used PDD in long-term ice sheet simulations by including a further feedback that is missing in the PDD approach. We added an extensive comparison between dEBM and PDD and more discussion of the PDD limitations.

4. **Refreezing / runoff:** In the revised manuscript, we added sensitivity runs to estimate the uncertainty of our model assumptions regarding meltwater refreezing / runoff. While the associated parameter value has no influence on the model calibration, it turns out that the exact parameter value even only has a minor influence on the overall modeled ice dynamics in the long-term commitment experiments. Alongside extensive discussion, we now include three more supplementary figures related to the refreezing parameter (Figs. S1, S19 and S20).

Please find our detailed point-by-point responses to all referee comments below. In this response letter, the reviewer comments are in black, while our responses are in blue. Line numbers mentioned in our responses refer to the “tracked changes” manuscript version, which is attached at the end of this document.

Yours sincerely,

Julius Garbe, on behalf of all co-authors

# Referee comment RC1 by Anonymous Referee #1

Received 07 Feb 2023, <https://doi.org/10.5194/tc-2022-249-RC1>

## Summary

This paper presents a new surface melt scheme in the Parallel Ice Sheet Model (PISM) coined dEBM-simple. The scheme is forced by air temperature and includes parameterizations for solar radiation, atmospheric transmissivity, and albedo evolution. The authors first tune their model using historical melt simulated by the regional climate model RACMO2.3p2 forced by CESM2. Ensuing comparison between RACMO2-CESM2 and dEBM-simple reveals a reasonably strong agreement in the simulation of mean annual and monthly surface melt rates. Based on this, the authors then force their model to 2100 using output from a SSP5-8.5 forcing of RACMO2-CESM2, and then to 2300 by repeating end-of-century forcing. Results show increasing melt, runoff, and snowfall, ice acceleration, and the importance of ice-albedo and ice-elevation feedbacks.

This is a very well written manuscript supported by clear, nicely illustrated figures. The introduction to the paper provides a great overview of the science and motivation for the work. Development of the dEBM-simple model is an important effort to bridge the gap between simple PDD melt schemes and more complex and computationally expensive energy balance approaches implemented in regional climate models. The model and methods are well described and the uncertainty quantification by varying parameter values is welcome. I do have several concerns that I would like the authors to address, particularly as it relates to the evaluation of the dEBM-simple results and determination of meltwater runoff.

I thank the authors for their time in considering my evaluation.

Response: We want to sincerely thank the referee for their valuable time and effort that went into this detailed review as well as for their nice words! Their excellent and insightful comments helped us considerably to improve this manuscript.

We have taken a conscious effort to address all comments in the revised manuscript and provide our point-by-point responses to them below.

## Major comments

The authors claim the validity of their new dEBM-simple approach by comparing it with historical (1950-2015) melt rates simulated by RACMO2. The major issue I see with this is that model parameters were specifically tuned to match RACMO2 over this same period, and thus this comparison does not represent an independent check on dEBM-simple's validity.

Response: We fully agree with the referee that a comparison with RACMO melt rates to assess the model performance of dEBM-simple constitutes no independent validation of the model given that it is calibrated based on forcing data from RACMO. In fact, we acknowledge

that “validation” is a misleading choice of words that was made rather accidentally. We have removed it from the manuscript and instead replaced it with “evaluation”. Just to briefly reiterate: the aim of this manuscript is not to prove the validity of the approach, but to apply the novel melt scheme to the Antarctic Ice Sheet and conceptually show that in principle the more physically based melt parameterization that includes another feedback is capable of replacing the traditionally-used PDD (given proper tuning), without compromising on computational efficiency or number of required inputs. The validity of the dEBM method is already thoroughly proven in Krebs-Kanzow et al. (2018, 2021), both of which are prominently referenced in the manuscript. The application of the “simple” version to the Greenland Ice Sheet (incl. showing that the parameterizations for albedo and transmissivity as well as the implementation in PISM work as expected) are thoroughly discussed in Zeitz et al. (2021).

That said, we have tried to make an effort of improvement in this respect by including a comparison of both the dEBM-simple as well as the RACMO-predicted melt rate estimates with satellite-derived estimates based on QuikSCAT data (Trusel et al., 2013) in the form of supplementary figures (Figs. S4, S9) and additional text in the main body of the manuscript. We like to emphasize that this comparison resembles only a brief snapshot in time from the perspective of an ice sheet, for which the long-term melt “climate” is more important than the melt “weather”.

A comprehensive evaluation of Antarctic surface melt conditions based on observations is still hampered by spatially and temporally scarce in situ meteorological observations that are unevenly distributed with no continental coverage. Observations derived from satellites and remote sensing can indeed cover the entire continent but span only relatively short time periods and bring along problems in their ‘correct’ interpretation, as the sensors do not measure the actual physical process of surface melt, but rather observe the presence of liquid water, leading to large spatiotemporal inconsistencies in the derived melt estimates from different sensors (Husman et al., 2023).

Consequently, melt estimates from regional climate models like RACMO that include the temporal intra-annual variability, the continent-wide as well as the long-term coverage, are thus currently “the best we have”. We chose to tune our scheme to RACMO because we think that this is currently the best model available for Antarctica (Mottram et al., 2021), but in principle dEBM-simple can be tuned to any other RCM as well. The tuning parameters are not hard-coded but can easily be changed in other PISM simulations.

Accordingly, we have strengthened the justification of our use of RACMO for the model calibration in the Introduction (lines 134-145) and expanded on its limitations (Sect. 3.2.1).

I am also not fully convinced that dEBM-simple is doing a better job than the PDD scheme. For example, all analyses for the historical period are quite similar, and the PDD scheme better matches RACMO2’s melt magnitude at the end of the century (Table 2). In addition, the maps of “present-day” (via the CESM2 historical scenario) melt (Figure 2a, Figure S7a) and their difference with RACMO2 (Figure 2b, Figure S7b) seem to suggest that the PDD scheme may be doing a better job at capturing some of the spatial characteristics of melt (e.g., across Ross, Ronne-Filchner, the Ross/Amundsen/Bellingshausen coasts) compared to RACMO2-CESM2 that is shown in the Figure S4 inset. The RACMO2 data in the Figure S4 inset also seem to

better agree with the spatial distribution of melt determined via satellite observations (cf. the cited Trusel et al 2013 paper), which suggests that dEBM-simple is underestimating melt in these low-melt regions. Note that this is counter to what the authors describe in the text of a general overestimation of melt in low-melt areas. The maps of dEBM-simple and PDD vs RACMO2 over the AP also seem to show lower biases in melt over the high-melt AP using the PDD scheme. The statistics listed (slopes and R values) are all quite similar as well, so I am somewhat concerned about whether dEBM-simple is doing a better job.

Response: First, we would like to clarify a potential misconception: in fact, proving that the dEBM-simple model is superior to PDD is not the point of the paper. Indeed, PDD has over the past decades repeatedly demonstrated to be an effective method to model surface melt in long-term ice sheet modeling studies with a surprisingly good overall performance given its simplicity and computational efficiency. That said, the main caveat of PDD is its negligence of the melt–albedo feedback, a limitation which is improved upon in the more physically-based dEBM-simple approach, without compromising on the number of required forcing inputs or computationally efficiency. The melt scheme is very comparable to the originally proposed by Krebs-Kanzow et al. (2018), only simplified by the parametrizations for albedo and atmospheric transmissivity (Zeitz et al., 2021). Krebs-Kanzow et al. (2018) rigorously compare the dEBM to PDD for Greenland and benchmark both against RCM data. We made sure to refer to Krebs-Kanzow et al. (2018) and Zeitz et al. (2021) prominently, so that interested readers can convince themselves about the differences between the dEBM and PDD melt schemes. Statistics about the performance of the “full” dEBM model can further be found in Fettweis et al. (2020) (also cited in the manuscript) and below.

In the revised manuscript we have reemphasized the main goal of the study, have added a more extensive comparison between dEBM-simple and PDD (incl. 2 additional supplementary figures Fig. S11 and S17) and added more discussion of the PDD limitations (lines 102-110; Appendix A).

That said, we like to address some of the specific points raised by the referee below in more detail:

- *“(…) the PDD scheme better matches RACMO2’s melt magnitude at the end of the century (…)”*

While this seems true on first glance, we like to point out that this better match with RACMO may partly happen by coincidence: PDD’s substantial overestimation of the mean 2090-2100 melt area (Figs. S16, S17) in combination with slightly less underestimated melt rates on Larsen Ice Shelf (compare Figs. 15b and 17b) likely compensated for the overall slightly worse correlation with respect to RACMO compared with dEBM-simple (which is also much improved with the new calibration). Please further bear in mind that the fixed-geometry assumption of RACMO might overestimate total melt volume in 2100, since calving may reduce the ice shelf area particularly along the shelf edges that make up most of the cumulative melt. In that sense, ice-sheet models that account for calving are expected to predict lower totals compared to RCMs.

- *“(…) the PDD scheme may be doing a better job at capturing some of the spatial characteristics of melt (…)”*

That is not entirely true. Their performance is indeed comparable, but the overall agreement with respect to RACMO is better for dEBM than for PDD (for both the whole AIS and the AP). This can be seen by the smaller deviations of the regression line slopes of dEBM compared to PDD in Figs. S9 and S11. While PDD shows less spread (R-value) with respect to RACMO, its overall bias towards lower melt rates is stronger.

- *“The RACMO2 data (…) also seem to better agree with the spatial distribution of melt determined via satellite observations (…), which suggests that dEBM-simple is underestimating melt in these low-melt regions. Note that this is counter to what the authors describe in the text of a general overestimation of melt in low-melt areas.”*

There seems to be a misconception here and we kindly disagree. Mean melt rates on Filchner-Ronne or Ross ice shelves at present are almost negligible in the cumulative melt volumes, so the extent of the melt area is not an appropriate measure and may perhaps be misleading, especially when averaging over multiple years. In fact, the apparent large melt area extents in FRIS / RIS in the Fig. S6 inset are rather an artifact stemming from only a few individual “outlier” years. The figures below compare the 10 individual years from the QuikSCAT record with RACMO, highlighting in particular that QuikSCAT for example shows only one shelf-wide melt event over RIS over that 10-year period (2004), whereas RACMO simulates at least four over the same period (2000, 2003, 2004, 2007). The absence of significant melt in these regions has been confirmed in other studies as well (e.g., Orr et al., 2023).

In conclusion, since the overall performance of dEBM-simple and PDD is comparable (with a slight tendency towards the calibrated dEBM-simple doing the better job), it is in general more preferable to use the more physically-based approach, which can account for the melt–albedo feedback, whereas the validity of the linear temperature–melt relationship of the PDD is unlikely to remain valid under future warming conditions.

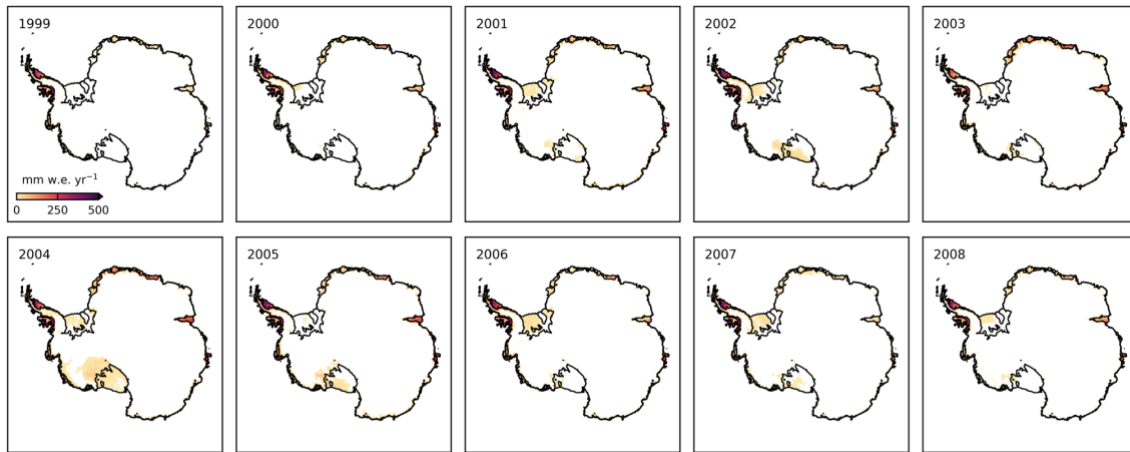

*QuikSCAT*

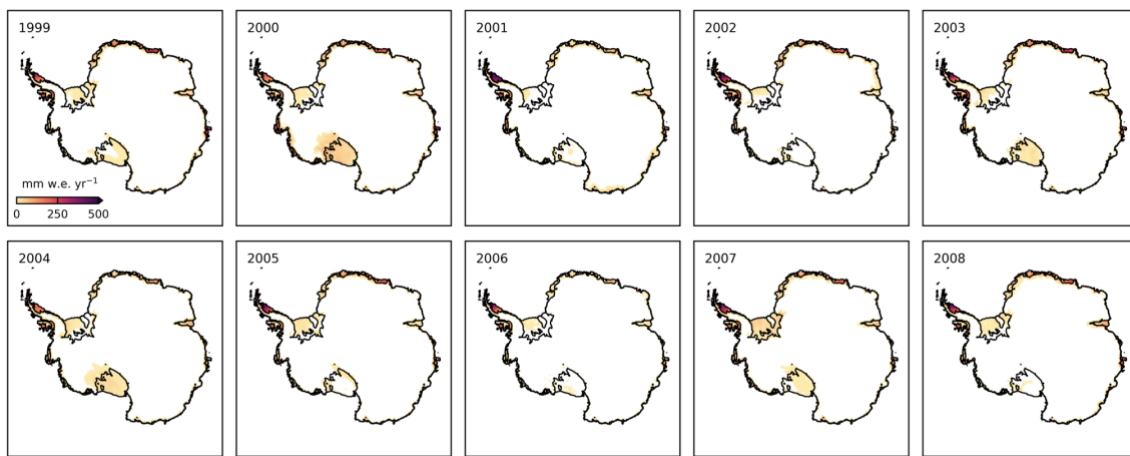

*RACMO2.3p2-CESM2*

The coastline/ice shelf extent displayed in Figure 2 and other maps is not an accurate reflection of the current extent of grounded and floating ice in Antarctica. For example, most ice shelves in West Antarctica appear to be missing, as is George VI on the AP. I presume this is because the PISM model does not simulate ice shelves here? Could the authors please comment on this in the text? Also, while ice shelves of Queen Maud Land appear to be present, they do not all seem to be marked as ice shelves. For example, the melt pattern of what looks to be Roi Baudouin ice shelf exists, but it's not shown as an ice shelf. Why is this?

**Response:** This is indeed true: the discrepancy arises due to the difference in ice-sheet topographies that were used in PISM and in RACMO as a result of the atmospheric temperature lapse-rate effect. In PISM, the present-day ice sheet state is derived via a model spin-up procedure that spans tens of thousands of years in which the grounding line is allowed to evolve freely according to the (fixed) boundary conditions and the thickness evolution on the basis of the flotation criterion. Consequently, slight deviations in modeled ice geometry with respect to observations are to be expected.

Nonetheless, based on the referee's comment and to overcome this inconsistency between air temperatures / melt rates and topography we have decided to re-do the calibration on the basis of the observed (Bedmap2) ice sheet topography.

Indeed, this resolves the grounding line mismatch in the historical simulations and leads to a slight overall improvement in performance with respect to modeled melt patterns. However, in contrast to the calibration experiments that were run assuming a fixed topography, the prognostic future simulations can only be initialized from the spun-up PISM state and thus have a slightly different initial geometry. In these simulations it would be ‘unrealistic’ to assume a fixed present-day geometry (as for example done in RACMO).

My last, and perhaps most important, major concern is with how runoff is calculated. The authors estimate 50% of surface melt becomes runoff. In comparison, the RACMO2.3p2 melt/runoff ratio over the contemporary period is ~6%, and in 2090-2100 is ~23%. Over the contemporary period, the dEBM-simple results therefore unrealistically suggest 9x the amount of runoff compared to RACMO2. At the end of the century, dEBM-simple produces ~160% of the runoff of RACMO2, yet only 70% of the amount of RACMO2’s melt. Estimating runoff to be fixed at 50% of melt is not physical, and this has very important consequences for other conclusions of the presented manuscript including constraining the future SMB, total mass budget, surface elevation changes, and ice dynamics.

Response: We completely agree with the reviewer’s concern that the assumption made in PISM of a uniform (temporally & spatially constant) refreezing factor poses indeed a model caveat that might introduce considerable uncertainty, especially in long-term projection runs and that we aim to improve in the future.

First of all, however, please also note that our runoff calculation does not affect the dEBM-simple calibration, as this is run using a fixed geometry (see line 424) and thus modeled meltwater runoff rates have no effect on the ice-dynamical evolution. This is different in the prognostic future runs, where runoff impacts SMB and hence elevation changes.

For the time being, we account for the uncertainty arising from the PISM assumption by performing additional sensitivity runs with different values for the refreezing parameter. Since the parameter is just a plain scaling of the produced meltwater, we can cover a large range of uncertainty by using a “higher-end” refreezing value and a “medium-/lower-end” value. We use both values in all simulations and contrast the respective results but use the lower value as default for the future scenarios. Thereby, the higher value is intended to be more representative of present-day climatic conditions and the lower value is intended to be more representative of end-of-century climatic conditions assuming an SSP5 warming scenario.

In the supplement, we now show an additional figure that contrasts the refreeze-per-melt fraction based on RACMO data for present day and at the end of the century (Fig. S1). Under present conditions, the AIS-wide mean refreeze fraction of RACMO is about 100%, while the full range of values is between ~20-140% (which may result from other processes not considered). Since melt occurs predominantly on ice shelves (with highest melt on the AP, which already today shows runoff fractions up to ~40-50%; see Fig. 3 from Gilbert & Kittel, 2021) while melt on grounded ice is generally so low that the influence of the exact refreezing amount on ice dynamics is negligible compared to the ice shelves, a value of 90% (“high” refreezing) seems plausible as a continental mean for present-day conditions.

For the future warming scenario, the RACMO freezing fraction averages about 70% across the ice sheet, while the full range of values shows an enormous spread of nearly zero up to 120%. In many parts of most ice shelves where intense melting occurs, the value is at or below



50%. Gilbert & Kittel (2021) calculate a mean runoff fraction of ~70% in 2100 and a mean runoff-per-melt fraction of ~45% across all ice shelves at a warming of 4°C, which could be exceeded in the second half of the century under SSP5. For the "medium-/lower-end" refreezing fraction, we thus assume a value of 50% as a continental mean representative for future warmer conditions.

Comparing the results obtained with both refreezing values in our sensitivity runs shows that the overall patterns of committed ice-dynamical changes under ~2100 climate remain similar and have only little effect on the presented results, so all main conclusions from the study remain unaffected. We thoroughly discuss these findings in Sect. 5.5 of the revised manuscript (starting from line 742) and in the Discussion (lines 853-858).

Further changes of the manuscript include, among others, an expanded paragraph on the refreezing parameter in Sect. 2.2.2 (lines 269-277) as well as two more supplementary figures assessing the impact of the uncertainty in the refreezing parameter in the commitment simulations (Figs. S19 and S20).

## Minor comments

L17: Please clarify here if the speed up in ice flow from elevation reductions are related to SMB decreases

Response: Done. Based on the reviewer's comment, we have also expanded on the respective text in Sect. 5.5 (lines 748-754). As explained in more detail there, the ice flow speed-up and elevation reductions are not *purely driven* by SMB decreases (mean SMB is still positive in the respective regions) but are *caused* by them. Furthermore, surface melting acts as a trigger for the melt–elevation feedback, which in turn causes more thinning and consequently enhanced dynamically-driven ice discharge into the ocean.

Please also note that all variables in Fig. 6 are plotted with respect to a present-day control simulation, i.e., no changes in ocean conditions, sub-shelf melting, or calving are applied.

L58: Regarding supraglacial lakes “play a major role in the ice sheet mass balance in East Antarctica” – My understanding is that the cited Stokes et al 2019 and Arthur et al 2022 papers assess the presence and variability of supraglacial lakes, but not their role in the ice sheet mass balance. Given that the cited papers do not discuss runoff of water from the lakes to the ocean (to my knowledge), the lakes are important in an energy balance/surface hydrology/ice shelf stability perspective, but not currently important in terms of the ice sheet mass budget.

Response: In fact, that's what we wanted to say – SGLs play an *indirect* yet important role in the ice sheet's mass balance via at least three major mechanisms: 1) they decrease the ice surface albedo and thus increase the absorption of incoming solar energy, enhanced by the positive melt–albedo feedback; 2) the rapid drainage of SGLs has been linked to the collapse of ice shelves, which can cause increased ice discharge from grounded ice via the reduced buttressing effect; 3) the drainage of SGLs to the bed of grounded ice in Greenland has been linked to transient speed-ups in ice velocity.

We agree that our wording might have been misleading and have rephrased the text accordingly.

L97: Description of PDD schemes here not entirely correct. They do not assume melt is “proportional to the number of days” above zero, but rather the cumulative sum of air temperatures above zero. I believe you more correctly describe PDD schemes later in the manuscript.

[Response:](#) Thank you for pointing us to this mistake. We have reworded the PDD description accordingly.

L245: Does the atmospheric transmissivity calculation include the effects of cloud climatologies in any way? This seems like it would be a relatively easy way to crudely account for cloudiness and perhaps reduce discrepancies with RACMO2 in cloudy areas like on the western AP, where dEBM-simple produces more melt than RACMO2.

[Response:](#) As detailed in Zeitz et al. (2021) and in Sect. 2.2.3, the parameterization of insolation-dependent melt in dEBM-simple is based on a linear fit of the atmospheric transmissivity as a function of the ice-sheet surface altitude. Since the fit parameters are derived from 1950–2015 average RACMO data, they are based on long-term average Antarctic summer cloud conditions. However, following the philosophy of the dEBM-simple approach, all parameters in this parameterization are constant in time and space.

As one of the main differences to the “simple” approach, seasonal and spatial cloud cover changes are indeed accounted for in the “full” dEBM model, published by Krebs-Kanzow et al. (2021) (see lines 234-237). In fact, it appears that the “full” version of the dEBM model is able to reduce some of the spatial discrepancies with respect to RACMO especially on the western Antarctic Peninsula that are present in the “simple” version.

For more details, please also see our response to the 2nd major comment by Referee #2 below. Note that those results are preliminary and derived with a standard model configuration calibrated for the Greenland Ice Sheet which is not yet calibrated for Antarctica – but will hopefully be done in the future!

L263: It’s stated here that “RACMO data show no clear dependence between melt and albedo values under historic and present-day climate conditions”, but is this true? For example, the cited Jakobs et al 2021 paper uses RACMO2 to show the melt-albedo feedback is important. Other work, like that of Lenaerts et al 2016 (Nature Climate Change; doi:10.1038/NCLIMATE3180) also show the importance of the melt-albedo feedback.

[Response:](#) We are sorry for the confusion caused, as we certainly do not debate that there is a dependency / feedback between melt and albedo in reality (as shown, e.g., in Lenaerts et al., 2016, Jakobs et al., 2019, or Jakobs et al., 2021).

However, as a matter of fact, there is no clear dependence between the two variables visible in the monthly averaged RACMO data over the historical period, at least when looking at Antarctic-wide multi-year monthly mean values (see figure below). To avoid misunderstandings, we included “AIS-wide monthly mean” in the respective sentence (line 307). Since in the dEBM-simple implementation albedo is a function of melt (Sect. 2.2.4; Zeitz et al., 2021), comparing albedo and melt from the period 2085–2100 resolves this dependence more clearly (Fig. S3). Please note that our sensitivity ensemble explores the impact of the related parameter uncertainties in more detail (Sect. 5.4).

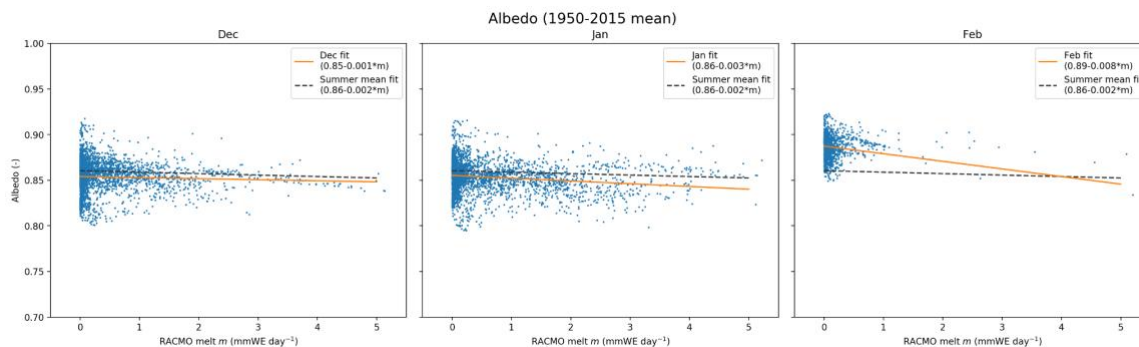

L370: Change to “historical”

[Response: Done.](#)

Figure 1c/d: The units here (and associated manuscript text) regarding monthly melt rates are confusing to me. First, should these be per month, not year (as these are monthly melt rates)? Second, are the values actually mm w.e. averaged over some area, not Gt? I fail to see how monthly melt rates could be several hundred Gt, yet yearly rates shown in panel a are <160 Gt/yr.

[Response:](#) In an effort to avoid too much confusion and for reasons of better comparability, we chose to present Antarctic-wide aggregated melt rates (as, for example, in Fig. 1) as a melt volume flux that is always given in Gt/yr for easier comparison. Monthly values (like, for example, in panel b) hence need to be divided by a factor of ~12 accordingly, to get the respective total melt volume of the given month.

The units of total (monthly or yearly) melt volumes as shown in Fig. 1 are indeed Gt/yr, as they are derived through aggregation of melt given in mm w.e./yr (or kg/sqm/yr) across the total ice sheet area.

We have added a clarifying note to the caption of Fig. 1 as well as a footnote in the main text.

L450: When discussing how dEBM-simple tends to underestimate melt in high-intensity regions and overestimate melt in low-intensity regions (notwithstanding my above ‘major’ comments to this regard), it would be helpful to include as supplementary figures maps of the difference between dEBM- and PDD-derived melt and RACMO2 across all of Antarctica, both for the present-day and future. This would allow for a better understanding of where (and potentially why) discrepancies exist between the methods.

[Response:](#) Thank you for this suggestion, which we appreciate. We have added the respective maps in the supplement (Fig. S9, S11, S15, and S17). The initial idea of just showing a cutout of the Antarctic Peninsula region was done in an effort to zoom in to the region with the highest biases, as smaller biases would otherwise be almost unrecognizable.

Figure 2: There’s an apparent circular/wavy pattern appearing between 1000 and 1500 mm w.e./yr. Could you comment on what is producing this? This also appears in Figure S7.

Response: The wavy pattern appears to be an artifact stemming from RACMO, rather than from the dEBM-simple model (it is already present in Fig. S4, which compares RACMO with satellite-derived melt estimates from QuikSCAT). It could potentially be related to grid resolution, but we would rather like to avoid too much speculation here.

Figure 2c, S7c: Please define what “n” is.

Response:  $m$  and  $n$  are the slope and intercept of the regression lines, respectively, and  $R$  is the Pearson correlation coefficient. We have added this explanation in all relevant figure captions.

Figure 3: The colors for melt and runoff are hard to distinguish. Please use a different color for runoff. Also, in the caption, it states that positive values of surface melt and runoff denote mass losses. Presumably, this should only say that runoff is mass loss, correct? Lastly, the albedo map in panel c is difficult to assess as it is not compared with present-day albedo. I would suggest rather than plotting the absolute value of albedo, the difference with present-day albedo could be plotted.

Response: We have adjusted the colors in this figure and amended the figure caption. Following the referee’s suggestion, panel c now shows the albedo change from 2015 to 2100.

L474+L492: This is actually the “western” margin considering south is up.

Response: Thank you, that’s a good spot! We have corrected the mistake in the revised manuscript.

L657: Again, I suggest the authors create maps of difference between their results and RACMO2 because the regional/spatial perspective (i.e., “high-intensity melt regions” and “low-intensity melt regions”) cannot be assessed in the scatter plots (i.e., Figures 1d, 2c, etc.).

Response: Done. Please also refer to our response to your comment on L450.

L693: Following on from my final “major” comment – I do not think the uncertainty produced by assuming runoff to be 50% of melt is properly explored. What would happen if runoff was fixed at 10%? 25%? Alternatively, what would the future ice dynamical evolution be if PISM was forced using (presumably more reliable) runoff rates prescribed directly from RACMO2?

Response: We fully agree with the referee’s concern regarding the uncertainty resulting from modeled runoff. As further explained above, our analysis now includes a high and a low refreezing parameter in all simulations in order to cover the full uncertainty range related to this model choice.

Our amendments of the manuscript include among others: an expanded paragraph on the refreezing parameter in Sect. 2.2.2 (lines 269-277); a new supplementary figure showing the refreeze-per-melt fraction from RACMO (Fig. S1); adding both values in Table 2; two more supplementary figures assessing the impact of the uncertainty in the refreezing parameter in the commitment simulations (Figs. S19, S20) alongside some more related discussion in Sect. 5.5 and in the Discussion section (Sect. 6).

As to the suggested alternative: we hope that the referee agrees that using modeled runoff rates from RACMO would go beyond the scope of the dEBM-simple approach, which is heavily based on the idea of computational efficiency and a least amount of forcing inputs.

Code and data availability: I would encourage the authors to consider uploading their code (particularly that to make the figures) to GitHub or Zenodo, rather than making it available “upon reasonable request”. The figures are all very nicely designed, and the community would benefit by being able to easily look at the underlying code!

Response: We thank the reviewer for their nice words and appreciate their suggestion. We will consider it until publication.

## Referee comment RC2 by Ella Gilbert

Received 09 Feb 2023, <https://doi.org/10.5194/tc-2022-249-RC2>

**Review of “The evolution of future Antarctic surface melt using PISM-dEBM-simple”, Garbe et al. submitted to *The Cryosphere* Jan 2023**

### Summary

The manuscript explores present and future Antarctic surface melting using a new surface melt module, dEBM-simple, coupled to the ice sheet model, PISM. The authors evaluate their configuration’s robustness with respect to surface melting as calculated by a positive degree day (PDD) model and the RACMO regional climate model. They show good agreement between their surface melt results and those produced by the more sophisticated model, RACMO. They emphasise the relative computational efficiency of dEBM-simple-PISM in comparison to running a complex model like RACMO and its superiority over PDD-based melt estimates.

The manuscript is very well presented, with a compelling argument and clear figures. It is a welcome contribution to the field that showcases an important tool. I have some general comments and suggestions that I feel would improve the manuscript, which are detailed below. My main concerns relate to the method of tuning present day / historical melt parameters to the same model that is used for validation (especially without a thorough discussion of RACMO’s own errors and limitations) and the need for more justification of what we can learn from the simulations out to 3000. However, in general I think it would be highly suited to publication in the journal, subject to the authors making adjustments in light of my and other reviewers’ comments.

Thanks to the authors for an interesting paper. EG

Response: We want to thank the referee for their positive evaluation of our manuscript and that they consider the manuscript “highly suited for publication in the journal”! Their insightful comments and suggestions have greatly helped us to improve this manuscript. We have implemented them in the revised manuscript version and respond to them point by point below.

### General comments / suggestions

Further discussion of the limitations of the PDD method could be included (e.g. in the lit review) to set up the significance of the work and usefulness of dEBM-simple

Response: We appreciate the reviewer’s suggestion; however, we would also like to stress that it is not the aim of this study to denigrate the PDD approach. In fact, PDD has over the past decades repeatedly demonstrated to be an effective method to model surface melt in long-term ice sheet modeling studies with a surprisingly good overall performance given its

simplicity and computational efficiency. That said, the main caveat of PDD is its negligence of the melt–albedo feedback, a limitation which is improved upon in the more physically-based dEBM-simple approach, without compromising on the number of required forcing inputs or computationally efficiency.

We have added a brief paragraph on the limitations of the PDD approach in the Introduction (lines 102-110; Appendix A) and try to make this point in the revised manuscript clearer now.

Some (brief) quantitative comparison between the simple/full versions of dEBM results would be informative

Response: While we absolutely agree that such a comparison would certainly be very informative, we would like to point out that the manuscript is already very comprehensive and applying the full dEBM scheme to the Antarctic Ice Sheet would be more worthy of a separate dedicated follow-on future project. Also, such a comparison is given in Krebs-Kanzow et al. (2021), who apply the full dEBM model to the Greenland Ice Sheet (we made sure to cite this paper prominently in our manuscript).

In the two figures below (similar to Fig. 1 and Fig. S9 from our manuscript), we show here a first rough comparison with the standard (Greenland-calibrated) version of the full dEBM scheme but would like to refrain from including it in our study.

As might be expected, the regression fits with respect to the 1950–2015 melt predictions from RACMO indicate an overall good agreement (AIS-wide temporal R-squared value of 0.92 in comparison to 0.88 from dEBM-simple and a AIS-wide spatial R value of 0.92 in comparison to 0.38 from dEBM-simple). Perhaps unsurprisingly, this indicates that the more complex the model (and the more forcings are used) the better is the overall correlation and regression fit (PDD < dEBM-simple < full dEBM).

On the other hand, however, high-intensity melt rates are strongly overestimated by the full dEBM in its un-tuned standard version (regression slopes of 1.42 in Fig. 1d and 1.52 in Fig. S9c, compared to 0.84 and 1.07 for dEBM-simple, respectively), which is most likely due to un-tuned albedo values; the slopes of the regression fits from the standard run could already be improved by preliminary calibration through adjusting the wet and dry snow albedo (not shown).

We like to stress again that the full dEBM is not “fit for purpose” in our scope, as more forcings from RCMs are needed which are not available on the long timescales that are the focus of the PISM-dEBM-simple approach and that are required for the study of some of the major ice-sheet–climate feedbacks.

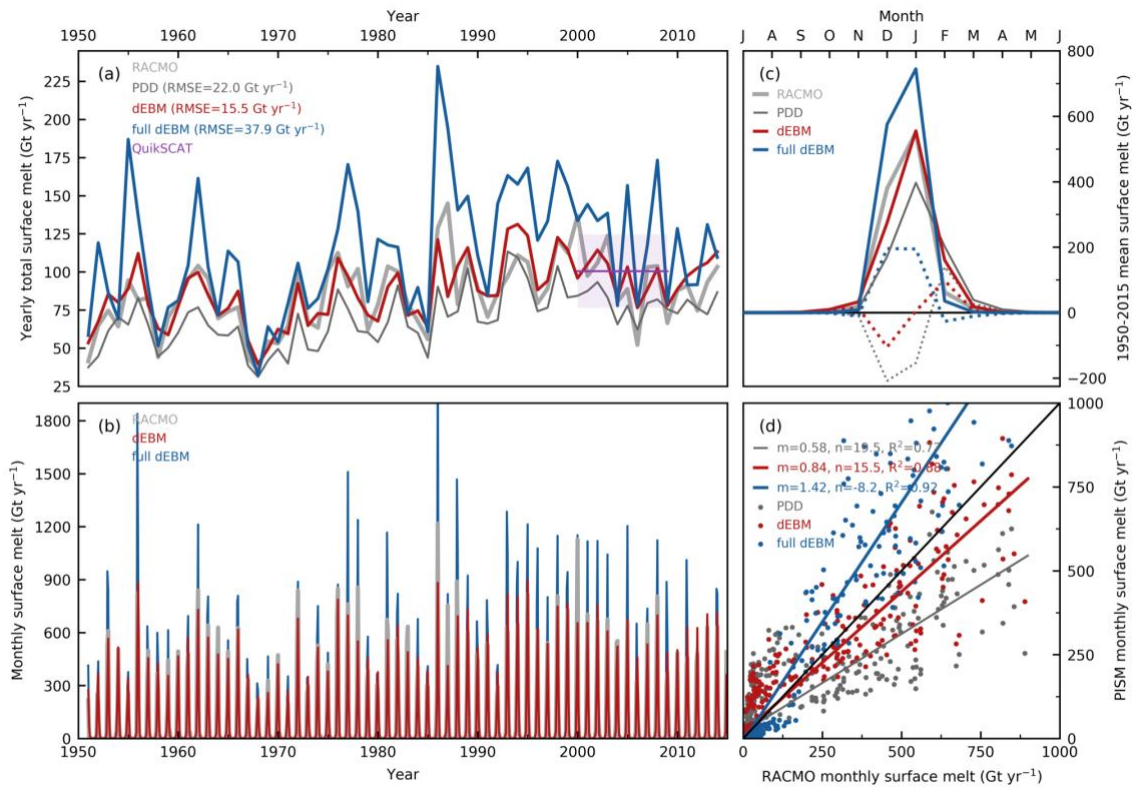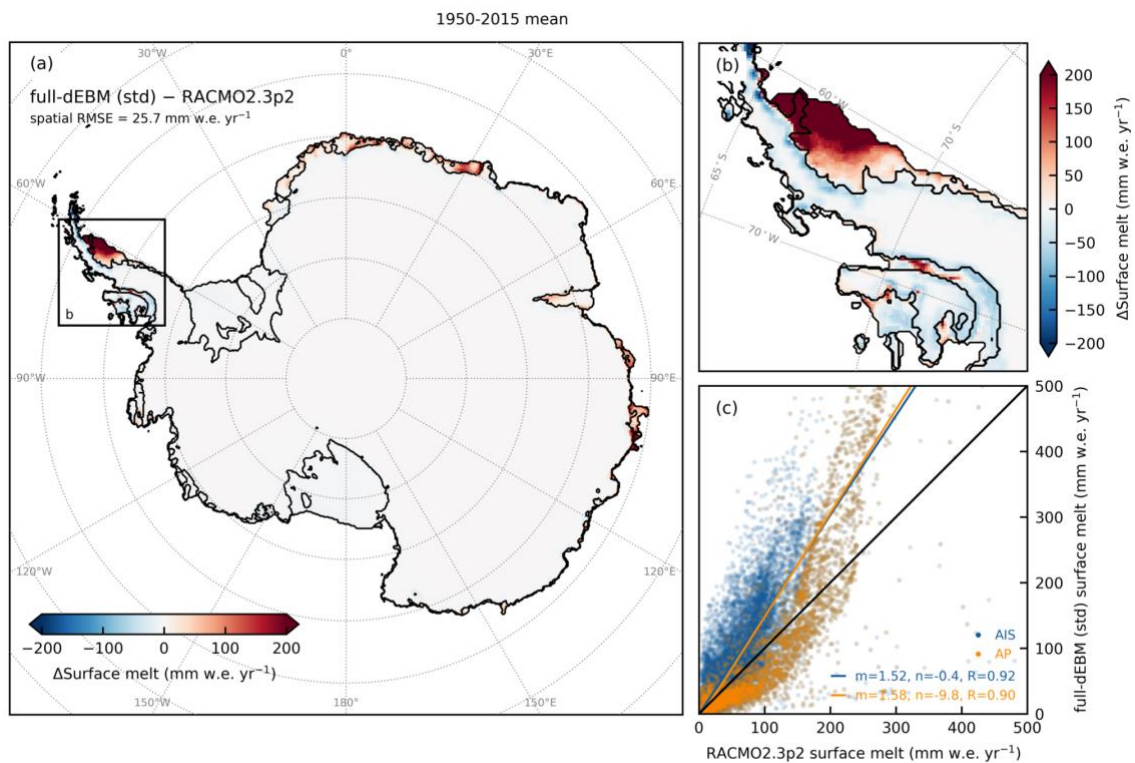

The temperature-melt index of Orr et al. (2022) could also be an interesting comparison for your work, to put your results into further context. <https://doi.org/10.1175/JCLI-D-22-0386.1>

**Response:** Thank you for this suggestion. We have added a short paragraph on the Orr et al. (2022) temperature-melt index approach in the Introduction (lines 113-118).



How well do RACMO / dEBM-simple capture melt associated with orographic features around the edges of the ice sheet e.g. foehn winds / adiabatically warmed katabatic outflow? I'm thinking especially of the Antarctic Peninsula – it seems from Fig 2 that there is limited melt adjacent to the mountains over Larsen C for example. At 27 km it is doubtful that RACMO will capture these sort of dynamics – even the 8 km PISM grid might be too coarse. What does this mean for melt estimates?

Response: As far as we know, melt dynamics resulting from orographic features are in principle accounted for in RACMO, although, as the reviewer correctly points out, it is doubtful how well they are captured here given the coarser resolution of the continental ice sheet setup. To our knowledge, improvements in this regard are in progress by B. Noël et al., (EGU 2023 poster) who statistically downscale RACMO melt rates to higher resolutions and found a substantial increase in melt particularly near the grounding line (e.g., of Larsen Ice Shelf). In the dEBM scheme, such orographic effects are not included. However, as the primary focus of the dEBM-simple model is on very long timescales (i.e., glacial-cycle paleo or deep-future applications) which usually require coarser model resolutions, we argue that smaller-scale melt characteristics or single extreme melt events are likely to be of less importance, and the melt 'climate' is more important than the melt 'weather' (c.f. Broeke et al., 2023). We have added a corresponding paragraph in the Discussion (lines 859-864).

The tuning of melt parameters to RACMO foreshadows the results. Although RACMO is undeniably a good model for estimating melt, it still contains errors and there is limited discussion of this in the paper. It would be better if dEBM-simple could be independently validated, for example against observational/satellite datasets, and then compared with RACMO. Otherwise the comparison in sect 5.1 against RACMO is somewhat meaningless because if you tune your melt parameters to match RACMO output, it's unsurprising that the results are similar.

Response: Please be referred to our response to the first major comment by Referee #1.

Clearly it is difficult to project beyond 2100 without any kind of post-2100 emissions scenarios. I recognise that you have attempted to address the lack of such input data here, but how useful is the fixed 2100 simulation for telling us about the deep future? It tells us more about the feedbacks and impacts of the 21st century high-emissions scenario than anything beyond 2100. I would like to see a little more justification and discussion of what we can learn from this particular experiment in Sect 5.4.

Response: That is completely true and perhaps a misconception that is presumably based on our unfortunate choice of words, for which we apologize. It is indeed not the aim of these simulations to tell us something about the deep future, but instead help us to understand the 'real' ice-dynamical effects of enhanced surface melting that might be reached at the end of century under the high-emission SSP5 scenario but that might not have played out in full in the year 2100 due to the long response times of the ice sheet and feedbacks that operate on longer timescales (i.e., "committed impacts").

Accordingly, we have removed the word "long-term" from the manuscript and now use "commitment / committed" instead.

I have also noted this below, but I would benefit from better explanation of how the isolation-dependent and temperature-dependent components of melt are separated.

Response: The temperature- and insolation-driven melt components are defined in the beginning of Sect. 5.3. We have amended this part and added more explanation, including references to the corresponding equations from Krebs-Kanzow et al. (2018), in the hope that it is clearer now (starting from line 630).

## Specific comments

170-172 Does the thinning/ loss of ice shelves feed back on the speed of glaciers and therefore ice discharge? Apologies if I've missed this elsewhere.

Response: Yes it does; due to the non-local solution of the shallow-shelf approximation that PISM is based on (Winkelmann et al., 2011) ice shelves influence upstream grounded glacier velocities as well. However, the 50 m thickness calving threshold has a negligible influence in this regard and is merely imposed for numerical stability, as noted in the next sentence of that paragraph (note that ice shelves with thicknesses < 50 m are also not observed in Antarctica). To clarify this, we added “dynamical” to the next sentence, which now reads: “The latter two calving conditions are mainly imposed due to numerical reasons and have only negligible influence on the overall ice-sheet dynamical evolution.” (lines 207-208)

230 Is RACMO melt corrected/validated before optimising to it? Optimising or tuning to an RCM (even a good one) still introduces error. It is also not an entirely independent comparison for the results.

Response: We agree and acknowledge this as one of the caveats of our study. To account for the uncertainties introduced by the RACMO forcing, we have added a more thorough justification for our use of RACMO in the Introduction of the revised version of the manuscript (lines 134-145), expanded on RACMO's model limitations (lines 357-367), and added a comparison between RACMO-predicted melt rates and satellite-derived melt estimates from QuikSCAT in the supplement (Fig. S4).

232-234 So, this means half of the meltwater generated runs off the surface? This is surely a significant overestimate for the present climate, when very little runoff occurs except over ice shelves? As far as I understand, 50% runoff may be a valid assumption for ice shelves by the end of the century (c.f. Gilbert & Kittel, 2021 – Fig 3) but it still strikes me as high for the grounded ice sheet.

Response: Please be referred to our response to the fourth major comment by Referee #1.

292-295 Choice of averaging period for climate data (RACMO) – why this one? Does it affect the boundary conditions? And why does it differ from the ocean forcing? (presumably because of data availability?)

Response: Yes, the reason for this choice is indeed data availability. Note that the procedure described in this section (Sect. 3.1) only refers to the model spin-up that is run over 400 kyr (thermal spin-up) plus 22 kyr (full-physics spin-up) and which requires averaging the boundary

forcing climate over a sufficiently long period in order to represent the “mean” present-day climate state as well as possible. Also, on these timescales, other processes (e.g., basal sliding of ice, subglacial hydrology, ocean-induced melt, calving etc.) likely have a larger impact on the overall ice-sheet evolution compared to the influence of the surface mass balance. For more details regarding the model spin-up procedure, please refer to Reese et al. (2020), which is also cited in this section.

296 Are the climatic BCs just repeatedly applied? E.g. the same climatology is applied every year for 22000 years?

Response: As mentioned above, here, during the spin-up, only a mean climate state is used without a yearly climatology. This mean climate is held fixed over the entire spin-up period. The procedure is just briefly summarized in this section, but more details of the ISMIP6 experimental setup are given in Reese et al. (2020) (which is cited twice in this section).

310 - 314 Here you justify your use of RACMO2.3. I think this would be strengthened by acknowledging the biases in RACMO too (if I recall correctly from the Mottram et al paper, RACMO still under-estimated the SMB slightly, although less than some of the other ensemble members)? You could also note that RACMO has one of the more sophisticated surface schemes, which has feedbacks on the quality of its atmospheric outputs.

Response: We have added a more thorough justification for our use of RACMO in the Introduction of the revised version of the manuscript (lines 134-145). We have also expanded on RACMO’s model limitations in Sect. 3.2.1 (lines 357-367) and have added a comparison between RACMO-predicted melt rates and satellite-derived melt estimates from QuikSCAT in the supplement (Fig. S4).

323 “The precipitation field is independent of the evolving ice-sheet geometry” – meaning that there are no changes in orography-precipitation interactions as the ice sheet evolves? Could be worth spelling out the implications of this statement.

Response: In PISM, usually the SMB is adjusted according to changes in surface elevation (in addition to changes in near-surface air temperatures) to account for the atmospheric lapse rate effect. In terms of precipitation this means: a lower ice surface altitude generally implies warmer air temperature and hence in general more precipitation according to the Clausius-Clapeyron law (see e.g., Frieler et al., 2015). (In terms of temperature, this effect is indeed taken into account for surface melting both in dEBM-simple and PDD, accounting for the surface melt–elevation feedback.) In practice, to account for this orographic effect on precipitation rates, precipitation is usually scaled with surface elevation changes in PISM (see e.g., Garbe et al., 2020). However, since the precipitation increase due to Clausius Clapeyron is already accounted for in the forcing input from RACMO, we set the corresponding scaling coefficient to zero to avoid double accounting, thus, on the downside, neglecting the mitigating effect of precipitation increase in the warmer atmospheric layers of lower surface altitudes in case of substantial elevation changes of the PISM ice topography.

We have added some corresponding text in the revised manuscript in Sect. 3.2.1 (lines 375-382) and in the Discussion (lines 359-364).

Fig 1 caption. Add that RMSE values are shown for each model compared to RACMO in panel a)

Response: Done.

419-422 but the melt peak is captured well in Fig 1c. , with virtually zero difference between RACMO/the 2 models in Jan. This is encouraging given that this is when melt is most intense

Response: Thank you for pointing this out. We have added a corresponding note to the text.

423 Missing processes such as?

Response: Added in the revised manuscript (lines 489-490). Also see Sect. 2 of Krebs-Kanzow et al. (2018) for a derivation of the dEBM-simple melt equation.

425 did you do any sensitivity tests to explore the impact of piecewise vs default interpolation?

Response: Yes, we have done now and also have added a figure similar to Fig. 1 in the supplement, showing the differences between the piecewise-constant and the interpolated temperature inputs (Fig. S21). See Appendix A for more details.

Sect 5.2 / Tab 2 This is perhaps a point for the discussion, but it would be interesting to see how your results compare to previous estimates of future SMB change, e.g. Kittel et al 2021 (<https://tc.copernicus.org/articles/15/1215/2021/>), Lenaerts et al. 2016 (<https://link.springer.com/article/10.1007/s00382-015-2907-4>), Donat-Magnin et al 2021 (<https://tc.copernicus.org/articles/15/571/2021/>)

Response: We thank the reviewer for these suggestions and are happy to include them for comparative reasons in the revised version of the manuscript.

500-501 As per my previous point re: resolution/the hydrostatic nature of RACMO, could this under-estimate actually be even greater if RACMO itself is under-estimating high-intensity melt hotspots? Although I acknowledge that you state that this has limited impact on overall totals...

Response: In fact, the comparison between RACMO and the melt estimates from QuikSCAT (Fig. S4) reveals a slightly differential picture: while Alexander Island (Wilkins and George VI ice shelves) are underestimated in RACMO, the northern tip of the peninsula (including the northern Larsen Ice Shelf) are overestimated with respect to QuikSCAT, suggesting only less-important overlap with the regions of significant underestimations in dEBM-simple (i.e., northern Larsen ice Shelf; compare Fig. S12 and S15). We have added some more explanation on this in the text (starting from line 595).

Note that Dalum et al. (2022) also points out that the melt fluxes observed by QuikSCAT in the Alexander Island region may also be overestimated due to extensive melt ponding and/or saturated firn conditions there, a feature which negatively affects the QuikSCAT retrievals.

Lastly, note that the new calibration (in combination with the corrected common surface mask of PISM and RACMO that is used in the analysis) substantially decreased the mismatch between dEBM-simple and RACMO in 2100 from ~30% to ~13% (Tab. 2, Fig. 5).

509+ Worth re-stating here that the melt equation describes average melt **\*\*when temperatures are above the melt threshold \*\*** I was originally confused by this as melting can of course only occur when there is a surplus of energy available to do melting and (sub-)surface temperatures are at the melting point. But re-reading section 2.2.2 I see the equation considers only melting when the temperature condition is met. A little more explanation of what the separate components of ‘temperature-driven’ and ‘SW-driven’ melt really mean would be welcome.

[Response:](#) Done. We added the  $T > T_{\min}$  condition to the dEBM melt equation (Eq. 6) and repeated it in the sentence at the beginning of Sect. 5.3 again. We expanded on the explanation of the different dEBM-simple melt components in that section, including adding again references to the corresponding equations from Krebs-Kanzow et al. (2018), in the hope that it is clearer now (starting from line 630).

What causes SW-driven melt to increase? Presumably this is related to the albedo feedback darkening the surface, reducing SW<sub>up</sub> and resulting in a measurable difference in SW<sub>net</sub>?

[Response:](#) Correct, the increase in shortwave insolation-driven melt is due to the albedo effect. This follows directly from the definition of  $M_{\text{insol}}$  under reduced albedos, given that  $SW_{\text{Phi}}$  remains more or less unchanged and changes in  $\tau$  are negligible. For more details on the positive melt–albedo feedback, please refer to Jakobs et al. (2019).

Fig 5 I can’t really see the purple shading in the main panel - can you make it darker? Also the grey text in the smaller panel is too light to read unless I zoom in really far and squint!

[Response:](#) We adjusted the colors in this figure.

Para beginning 620 – not sure this summary is needed. You can probably just launch straight into your discussion points.

[Response:](#) We have removed the first two paragraphs of this section.

643 How does the temperature-dependent split of rain/snow compare against rain/snow inputs from RACMO? Did you look at that?

[Response:](#) From looking at the RACMO inputs, it seems that the assumption made in PISM is justified (see figure below). Based on the average precipitation over the entire historical period (1950–2015), RACMO suggests values of about +2.5°C for the temperature threshold above which all precipitation falls as rain, and about –0.5°C for the temperature threshold below which all precipitation falls as snow, which is fairly close to the default values used in PISM (2.0°C and 0°C, respectively; black dashed lines).

Please kindly note that the dEBM-simple model only computes surface melt, while precipitation is not different from previous model configurations of PISM and not in the scope of the present study.

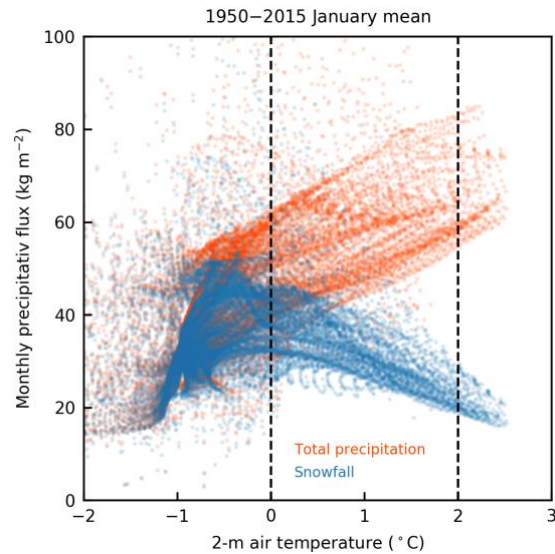

700 Evaporation may also become more important in future (especially under strong warming scenarios like SSP5-8.5)

[Response:](#) We have added a corresponding sentence in this section (lines 867-868).

## Technical corrections

411 remove comma after “both”

[Response:](#) Done.

531 “as high as few degrees” → “as high as a few degrees”

[Response:](#) Done.

622 “to serve as full-fledged” → “to serve as a fully-fledged”

[Response:](#) Done.

706-710 Very long sentence! Suggest splitting into two.

[Response:](#) Done.

## References

- Broeke et al.: Contrasting current and future surface melt rates on the ice sheets of Greenland and Antarctica: Lessons from in situ observations and climate models, *PLOS Climate*, 2, e0000203, 2023.
- Dalum et al.: Sensitivity of Antarctic surface climate to a new spectral snow albedo and radiative transfer scheme in RACMO2.3p3. *Cryosphere* 16, 1071–1089, 2022.
- Fettweis et al.: GrSMBMIP: intercomparison of the modelled 1980–2012 surface mass balance over the Greenland Ice Sheet. *Cryosphere* 14, 3935–3958, 2020.
- Frieler et al.: Consistent evidence of increasing Antarctic accumulation with warming, *Nature Climate Change*, 5, 348–352, 2015.
- Garbe et al.: The hysteresis of the Antarctic Ice Sheet, *Nature*, 585, 538–544, 2020.
- Gilbert & Kittel: Surface Melt and Runoff on Antarctic Ice Shelves at 1.5°C, 2°C, and 4°C of Future Warming. *Geophys Res Lett* 48, e2020GL091733, 2021.
- Husman et al.: Remote Sensing of Surface Melt on Antarctica: Opportunities and Challenges. *IEEE J Sel Top Appl* 16, 2462–2480, 2023.
- Jakobs et al.: Quantifying the snowmelt–albedo feedback at Neumayer Station, East Antarctica, *The Cryosphere*, 13, 1473–1485, 2019.
- Jakobs et al.: Spatial Variability of the Snowmelt-Albedo Feedback in Antarctica, *Journal of Geophysical Research: Earth Surface*, 126, e2020JF005696, 2021.
- Krebs-Kanzow et al.: Brief communication: An ice surface melt scheme including the diurnal cycle of solar radiation, *The Cryosphere*, 12, 3923–3930, 2018.
- Krebs-Kanzow et al.: The diurnal Energy Balance Model (dEBM): a convenient surface mass balance solution for ice sheets in Earth system modeling, *The Cryosphere*, 15, 2295–2313, 2021.
- Lenaerts et al. Meltwater produced by wind–albedo interaction stored in an East Antarctic ice shelf. *Nat Clim Change* 7, 58–62, 2017.
- Mottram et al.: What is the surface mass balance of Antarctica? An intercomparison of regional climate model estimates. *Cryosphere* 15, 3751–3784, 2021.

Orr et al.: Characteristics of Surface “Melt Potential” over Antarctic Ice Shelves based on Regional Atmospheric Model Simulations of Summer Air Temperature Extremes from 1979/80 to 2018/19, *Journal of Climate*, 36, 3357–3383, 2023.

Reese et al.: The role of history and strength of the oceanic forcing in sea level projections from Antarctica with the Parallel Ice Sheet Model, *The Cryosphere*, 14, 3097–3110, 2020.

Trusel et al.: Satellite-based estimates of Antarctic surface meltwater fluxes, *Geophysical Research Letters*, 40, 6148–6153, 2013.

Winkelmann et al.: The Potsdam Parallel Ice Sheet Model (PISM-PIK) – Part 1: Model description. *Cryosphere* 5, 715–726, 2011.

Zeitz et al.: Impact of the melt–albedo feedback on the future evolution of the Greenland Ice Sheet with PISM-dEBM-simple, *The Cryosphere*, 15, 5739–5764, 2021.



# The evolution of future Antarctic surface melt using PISM-dEBM-simple

Julius Garbe<sup>1,2</sup>, Maria Zeitz<sup>1,2</sup>, Uta Krebs-Kanzow<sup>3</sup>, and Ricarda Winkelmann<sup>1,2</sup>

<sup>1</sup>Potsdam Institute for Climate Impact Research (PIK), Member of the Leibniz Association, P.O. Box 60 12 03, 14412 Potsdam, Germany

<sup>2</sup>University of Potsdam, Institute of Physics and Astronomy, Karl-Liebknecht-Str. 24-25, 14476 Potsdam, Germany

<sup>3</sup>Alfred Wegener Institute Helmholtz Centre for Polar and Marine Research, Bremerhaven, Germany

**Correspondence:** Julius Garbe (julius.garbe@pik-potsdam.de)

**Abstract.** It is virtually certain that Antarctica’s contribution to sea-level rise will increase with future warming, although competing mass balance processes hamper accurate quantification of the exact magnitudes. Today, ocean-induced melting underneath the floating ice shelves dominates mass losses, but melting at the surface will gain importance as global warming continues. Meltwater at the ice surface has crucial implications for the ice sheet’s stability, as it increases the risk of hydrofracturing and ice-shelf collapse that could cause enhanced glacier outflow into the ocean. Simultaneously, positive feedbacks between ~~the atmosphere and the ice elevation and albedo~~ ice and atmosphere can accelerate mass losses and increase the ice sheet’s sensitivity to warming. However, due to long response times it may take hundreds to thousands of years until the ice sheet fully adjusts to the environmental changes. Therefore, ice sheet model simulations must be computationally fast and capture the relevant feedbacks, including the ones at the ice–atmosphere interface.

Here we use the novel surface melt module dEBM-simple, coupled to the Parallel Ice Sheet Model (PISM), to estimate the impact of 21<sup>st</sup>-century atmospheric warming on Antarctic surface melt and ~~long-term~~ ice dynamics. As an enhancement compared to the widely adopted positive degree-day (PDD) scheme, dEBM-simple includes an implicit diurnal cycle and computes melt not only from the temperature, but also from the influence of solar radiation and changes in ice albedo, thus accounting for the melt–albedo feedback. We calibrate PISM-dEBM-simple to reproduce historical and present-day Antarctic surface melt rates given by the regional climate model RACMO2.3p2 and use the calibrated model to assess the range of possible future surface melt trajectories under SSP5-8.5 warming projections ~~, extended beyond 2100~~ until the year 2100. To investigate the committed impacts of the enhanced surface melting on the ice-sheet dynamics, we extend the simulations under fixed climatological conditions until the ice sheet has reached a state close to equilibrium with its environment. Our findings reveal a substantial surface melt-induced speed-up in ice flow associated with large-scale elevation reductions in sensitive ice-sheet regions, underscoring the critical role of self-reinforcing ice-sheet–atmosphere feedbacks on future mass losses and sea-level contribution from the Antarctic Ice Sheet on centennial to millennial timescales.

## 1 Introduction

Over the past decades, observations have shown that the Antarctic Ice Sheet has been losing mass to the ocean at increasing rates (Shepherd et al., 2012; Gardner et al., 2018; The IMBIE Team, 2018; Rignot et al., 2019), thereby contributing to global  
25 sea-level rise (Meredith et al., 2019). To date, Antarctica's contribution to sea-level rise has been comparatively modest, but is expected to increase in the future (Fox-Kemper et al., 2021; Seroussi et al., 2020). With a volume of 58 m sea-level equivalent (Fretwell et al., 2013; Morlighem et al., 2019), the Antarctic Ice Sheet is the largest freshwater reservoir on Earth and thus represents the by far largest potential source of future sea-level rise under global warming.

Changes in the total mass of the ice sheet are governed by changes in mass accumulation at the surface and ice discharge  
30 into the ocean. At its upper surface, the ice sheet gains mass mainly through snowfall, while mass is lost around its edges to the ocean through the calving of icebergs and melting underneath the floating ice shelves that surround most of Antarctica's coastline, as well as by dynamic thinning and accelerated outflow of grounded ice. At present, the overall mass changes of the ice sheet are dominated by the Amundsen Sea Embayment sector of the West Antarctic Ice Sheet and the Antarctic Peninsula, where ice shelves, driven by relatively warm ocean waters, are melted from below (Pritchard et al., 2012; Depoorter et al., 2013;  
35 Rignot et al., 2013; Jenkins et al., 2018; Holland et al., 2019) and ice is lost through iceberg calving (Depoorter et al., 2013; Greene et al., 2022). By providing a mechanical buttressing on upstream glaciers, the ice shelves are crucial in modulating ice discharge from the grounded ice inland (Dupont and Alley, 2005; Gudmundsson, 2013; Fürst et al., 2016). While thinning or even disintegration of the floating shelves does not directly affect the sea level, it reduces this restraining effect, causing an acceleration of outlet glacier flow from the grounded ice sheet towards the coast and consequently a greater freshwater flux  
40 into the ocean (Scambos et al., 2004; Rott et al., 2011; Paolo et al., 2015; Gardner et al., 2018), thereby adding to sea-level rise.

Despite major model improvements over the past, large uncertainties in projected future sea-level contribution from Antarctica remain (Pattyn and Morlighem, 2020). Besides uncertainties in the climate forcing (Seroussi et al., 2020), much of these uncertainties originate from the poorly understood response of East Antarctica to atmospheric and oceanic warming (Stokes et al., 2022), which may emerge as the single largest driver of future sea level simply due to the sheer size of the ice sheet. In  
45 contrast to the West Antarctic Ice Sheet, mass gains and losses of the East Antarctic Ice Sheet are close to balance, although its contribution to sea-level rise has slightly increased recently (Gardner et al., 2018; The IMBIE Team, 2018; Rignot et al., 2019). The considerable spread in estimates of East Antarctic mass balance is mainly caused by uncertainties in the surface mass balance (the net mass accumulation/ablation rate at the ice sheet surface) rather than ice discharge (Stokes et al., 2022). At present, the surface mass balance of Antarctica is largely dominated by snowfall, as average air temperatures over most  
50 parts of the ice sheet are below the freezing point and thus too low to cause substantial snow or ice melting at the surface. Other surface mass balance components such as rain, sublimation/evaporation, blowing snow erosion/deposition, or meltwater runoff are at least one order of magnitude smaller (Lenaerts et al., 2019; Stokes et al., 2022). In particular, summer melting in Antarctica is currently mostly confined to the ice shelves and the lower-elevation margins of the ice sheet with most intense and widespread melting occurring on the Antarctic Peninsula (Tedesco and Monaghan, 2009; Munneke et al., 2012; Trusel et al.,  
55 2013) where air temperatures are highest.

Under the comparatively cold conditions at present a major portion of the surface meltwater refreezes in the firn layer (Lenaerts et al., 2019). However, persisting and actively evolving large-scale surface drainage systems have been observed that transport meltwater through networks of surface streams and supraglacial ponds across the ice sheet and onto the ice shelves (Kingslake et al., 2017; Bell et al., 2018). In particular, active and widespread formation of supraglacial meltwater lakes has recently been ~~shown to also play a major role in the ice sheet mass balance in East Antarctica (Stokes et al., 2019; Arthur et al., 2022)~~ found to also occur in East Antarctica (Lenaerts et al., 2017; Stokes et al., 2019; Arthur et al., 2022), which is generally thought to be less vulnerable to climate warming than the neighboring West Antarctic Ice Sheet or the Antarctic Peninsula. The presence of meltwater on the ice shelf surface has important implications for the stability of the Antarctic Ice Sheet, as it facilitates meltwater-induced fracture propagation (“hydrofracturing”), thereby increasing the risk of ice-shelf collapse (e.g., Scambos et al., 2000; Noble et al., 2020; Lai et al., 2020). For example, the breakup of the Larsen A Ice Shelf in the mid-1990s as well as the collapse of Larsen B Ice Shelf over a period of just a few weeks in 2002 have been linked to this process (Scambos et al., 2000, 2004; Rignot et al., 2004; Broeke, 2005a). Even more concerning is that the disintegration of buttressing ice shelves caused by increased meltwater production might promote unstable and potentially irreversible rapid inland ice retreat through instability mechanisms in some regions of the grounded ice sheet. In marine ice-sheet regions – regions ~~that are characterized~~ by ice resting where the ice rests on deep and often inland-sloping beds submerged hundreds to thousands of meters below sea level, as found in most of West Antarctica and large parts of East Antarctica (Morlighem et al., 2019) – the ice sheet is susceptible to instability mechanisms known as ‘marine ice-sheet instability’ (Weertman, 1974; Schoof, 2007) and ‘marine ice cliff instability’ (Bassis and Walker, 2012; Pollard et al., 2015) that could potentially cause long-term global sea-level rise on the order of multiple meters (DeConto and Pollard, 2016; Sun et al., 2020; DeConto et al., 2021).

As warming progresses over the coming centuries, ice mass losses resulting from surface meltwater runoff are projected to increase (Trusel et al., 2015; Kittel et al., 2021; Gilbert and Kittel, 2021). At the same time, an increase in snowfall, associated with the higher saturated vapor pressure of a warmer atmosphere (Frieler et al., 2015; Palerme et al., 2017), is expected to largely compensate for the projected increase in surface runoff (Favier et al., 2017; Medley and Thomas, 2018; Stokes et al., 2022). However, the balance between both processes still remains unclear and might shift in the future. In 21<sup>st</sup>-century model projections of Antarctic Ice Sheet mass balance, the increasing surface mass balance (especially in East Antarctica) is outweighing increased discharge, even under high-end forcing scenarios (Seroussi et al., 2020; Favier et al., 2017; Edwards et al., 2021; Stokes et al., 2022). However, in long-term (multi-centennial- to millennial-scale) warming simulations the positive surface mass balance trend shows a peak and subsequent reversal (Golledge et al., 2015; Golledge, 2020; Garbe et al., 2020). Owing to the positive surface-elevation–melt feedback (Weertman, 1961; Levermann and Winkelmann, 2016) this effect can be enhanced once a surface lowering is triggered through initial melting. The point at which the surface mass balance of an ice sheet becomes negative is sometimes referred to as a critical tipping point for ice mass loss (Robinson et al., 2012; Garbe et al., 2020).

Surface melt can also be enhanced by the positive melt–albedo feedback: when snow or ice melt, meltwater at the surface or refreezing meltwater in the snow and firn layers decrease the albedo (i.e., the reflectivity) of the surface, leading to a higher absorption of incoming solar radiation and in return more intense melt (Jakobs et al., 2019). This feedback has been shown

to play a crucial role over large parts of the Antarctic Ice Sheet to accelerate surface melt (Jakobs et al., 2021). Particularly in long-term ice-sheet model simulations and sea-level rise projections it is therefore decisive to include this melt–albedo feedback in addition to mechanisms like the surface-elevation–melt feedback (Fyke et al., 2018).

95 While a number of sophisticated process-based regional climate models are available and used to model the ice–atmosphere interactions and their influence on the historical and future evolution of the surface energy and mass balance of the Antarctic Ice Sheet (e.g., Wessem et al., 2018; Agosta et al., 2019; Souverijns et al., 2019; Bromwich et al., 2013; Trusel et al., 2015; Lenaerts et al., 2018; Kittel et al., 2021; Mottram et al., 2021), such models are often too computationally demanding to run in coupled dynamical atmosphere–ice-sheet model setups over timescales beyond the end of the century. To overcome this deficiency, empirical-based statistical surface melt parameterizations are commonly adopted in ice-sheet models, often referred to as ‘temperature-index schemes’. The perhaps most prominent example is the widely used positive degree-day (PDD) method, which assumes that surface melt is proportional to the ~~number of days with~~ temporal integral of surface air temperatures above the melting point (e.g., Braithwaite, 1985; Reeh, 1991; Hock, 2003). While PDD parameters are generally tuned to accurately reproduce contemporary melt rates, and have repeatedly been shown to yield very good agreements with observations (e.g., Fettweis et al., 2020), these parameter values may not necessarily hold for orbitally-driven climate change in long-term (past and future) applications when the sensitivity of the surface mass balance to temperature is different than it is today (Bougamont et al., 2007; van de Berg et al., 2011; Robinson and Goelzer, 2014). For example, it has been shown that the PDD method is unable to drive glacial–interglacial ice volume changes of the Greenland Ice Sheet due to its negligence of albedo feedbacks (Bauer and Ganopolski, 2017). In addition, in situ observations show that in the cold Antarctic climate, shortwave radiation is usually the predominant source of energy for melt at the surface (Jonsell et al., 2012; King et al., 2015; Broeke et al.,  
100 , challenging the physical validity of applying temperature-index melting schemes in Antarctic modeling studies.

~~Here, we apply the novel surface model dEBM-simple, which has recently been implemented by Zeitz et al. (2021) as a surface mass balance module in the Parallel Ice Sheet Model (PISM; Bueler and Brown, 2009; Winkelmann et al., 2011), for the first time in an Antarctic Ice Sheet model configuration. As an example of an alternative approach to the PDD, Orr et al. (2023) use a local probability density function derived from regional climate models that allows to calculate melt potential indices and local hot-spots in melt potential. They find the highest shelf-wide values for the Antarctic Peninsula and lowest values for the Filchner-Ronne and Ross ice shelves. However, the melt potential is an index purely derived from local temperatures that assumes a linear relationship between temperature and melt and thus does not include any melt–albedo feedback.~~

The novel surface model dEBM-simple aims to fill this gap which exists between process-based regional climate models and empirical temperature-index melt schemes in terms of physics-based process detail versus computational efficiency. The dEBM-simple is a slightly modified version of the “simple” diurnal Energy Balance Model put forward by Krebs-Kanzow et al. (2018) and extends the has recently been implemented by Zeitz et al. (2021) as a surface mass balance module in the Parallel Ice Sheet Model (PISM; Bueler and Brown, 2009; Winkelmann et al., 2011). It improves upon the conventional PDD approach to explicitly include by explicitly including the influence of solar radiation and parameterizes parameterizing the  
115 ice surface albedo as a function of melting, thus implicitly accounting for the melt–albedo feedback (Zeitz et al., 2021). The  
120  
125

model requires only monthly surface air temperatures and precipitation as inputs, yet it accounts for the diurnal energy cycle of the ice surface. Its computational efficiency is comparable to that of the PDD method, making it particularly suitable for long-term (millennial-scale) prognostic ice-sheet model runs. A “full” version of the diurnal Energy Balance Model (dEBM; regarding the main differences compared to the “simple” model version, see below) was recently introduced by Krebs-Kanzow et al. (2021) and has shown good skill in simulating the surface mass balance of the Greenland Ice Sheet in a recent model intercomparison project (GrSMBMIP, Fettweis et al., 2020).

In this work, we ~~first~~ apply the dEBM-simple for the first time in an Antarctic Ice Sheet model configuration. Therefor, we first calibrate the coupled PISM-dEBM-simple model setup to correctly reproduce historical and present-day Antarctic melt rate patterns ~~by using~~ (Sect. 4). Evaluating Antarctic surface melt is thereby still hampered by sparse observations, as the continent’s sheer size, remoteness, and extreme weather conditions lead to in situ ground-based meteorological observations (e.g., from staffed or automatic weather stations) being scarce in space and time and unevenly distributed across the ice sheet (Jakobs et al., 2020), while observations from remote sensing only span a relatively short period ( $\lesssim$  few decades), lack seasonal variability, and their interpretation remains challenging (Trusel et al., 2013; Husman et al., 2023). To assess the melt ‘climate’ of the ice sheet (i.e., its longer-term interannual variability and trends), which is needed for a reliable calibration of ice-sheet model surface melt schemes, regional climate models that incorporate the intra- and interannual variability, have a continent-wide spatial coverage, and can cover timescales from multiple decades up to centuries, can serve to fill these gaps in space and time (e.g., Broeke et al., 2023). For the calibration of PISM-dEBM-simple we here use output from the regional atmospheric climate model RACMOv2.3p2 (Wessem et al., 2018) ~~(Sects. 4) and validate it by comparing its performance,~~ a climate model that is specifically developed for simulating polar climates and that has been extensively evaluated using observations and automatic weather stations, including surface melt (Wessem et al., 2018; Jakobs et al., 2020).

We here assess the performance of the coupled model setup by comparing it against RACMO and PDD, as well as against satellite-derived meltwater flux estimates (Sect. ~~??~~5.1). To investigate the evolution of Antarctic surface melt under warmer than present conditions, we then force the calibrated model with a strong 21<sup>st</sup>-century warming scenario from RACMO2.3p2 in idealized atmospheric warming simulations (Sect. ~~??~~5.2) and estimate the robustness of the results with regard to different modeling choices (Sect. 5.4). In order to study the ~~long-term-effects-committed impacts~~ of intensified surface melting on the dynamics of the Antarctic Ice Sheet and to account for the longer timescales of involved feedbacks, we extend the simulations after the year 2100 beyond the end of the available forcing under fixed end-of-century atmospheric climate conditions until the year ~~3000~~5000, when the ice sheet has reached a state close to equilibrium with its environment (Sect. ~~??~~5.5). In the final sections, we discuss our findings (Sect. 6) and draw some brief conclusions (Sect. 7).

## 155 2 Model description

For the model experiments described here, we use the Parallel Ice Sheet Model (PISM; Bueler and Brown, 2009; Winkelmann et al., 2011; The PISM Authors, 2020; <https://www.pism.io>, last access: ~~1-December-2022~~7 July 2023), coupled to a “simple” version of the diurnal Energy Balance Model (Krebs-Kanzow et al., 2018) to serve as a surface mass balance module (PISM-

dEBM-simple; Zeitz et al., 2021). The implementation of the dEBM-simple in PISM including the adopted modifications is described in more detail in Zeitz et al. (2021). Below, we give a short overview of PISM’s main characteristics (Sect. 2.1), followed by a more detailed overview of the dEBM-simple including a description of the relevant modifications from Krebs-Kanzow et al. (2018) (Sect. 2.2).

## 2.1 Ice-sheet model (PISM)

Here, we use a slightly modified version of the open-source Parallel Ice Sheet Model (PISM) release v1.2. PISM is a hybrid, shallow, thermo-mechanically coupled, and polythermal ice-sheet/ice-shelf model. The hybrid stress balance in PISM combines the shallow-ice (SIA) and shallow-shelf/shelfy-stream (SSA) approximations of the Stokes flow over the entire ice-sheet/ice-shelf domain, ensuring a consistent transition of stress regimes across the grounded-ice to floating-ice boundary (Winkelmann et al., 2011). SIA and SSA ice velocities are thereby computed on a regular horizontal grid using finite differences, whereas ice temperature and softness are computed in three dimensions through an enthalpy formulation (Aschwenden et al., 2012). The model is run on a grid of 8 km horizontal resolution in all experiments. The vertical grid spacing in the ice is quadratical, with 121 vertical layers ranging between 13 m at the ice base and 87 m at the top of the computational domain ( $761 \times 761 \times 121$  total grid points). The ice rheology is described by the Glen-Paterson-Budd-Lliboutry-Duval flow law (Lliboutry and Duval, 1985) with a Glen exponent of  $n = 3$ . Ice-flow enhancement factors are set equal to one for both, SIA and SSA. Basal shear stress near the grounding line is interpolated on a sub-grid resolution, which has been shown to result in grounding-line motion comparable to a full-Stokes model throughout a wide range of resolutions (Feldmann et al., 2014), even without imposing additional flux conditions.

At the basal ice–bedrock boundary, a generalized “pseudo-plastic” power law relates bed-parallel shear stress and ice sliding (Schoof and Hindmarsh, 2010):

$$\tau_b = -\tau_c \frac{\mathbf{u}_b}{u_0^q |\mathbf{u}_b|^{1-q}}, \quad (1)$$

where  $\tau_b$  is the basal shear stress,  $\mathbf{u}_b$  is the SSA basal sliding velocity,  $u_0 = 100 \text{ m yr}^{-1}$  is a threshold velocity, and  $0 \leq q \leq 1$  is the pseudo-plastic sliding exponent (here  $q = 0.75$ ). The yield stress  $\tau_c$  is determined using the Mohr-Coulomb criterion as a function of microscopic till material properties (till friction angle  $\phi$ ) and the effective till pressure  $N$  (Cuffey and Paterson, 2010):

$$\tau_c = c_0 + \tan(\phi) N. \quad (2)$$

The parameter  $c_0$  is called the “apparent till cohesion” and is usually set to zero (Schoof, 2006, Eq. (2.4)). In PISM, the till friction  $\phi$  is parameterized as a piecewise-linear function of the bed topography  $b$  (Martin et al., 2011). This approach is based on the assumption that the bed of fast-moving ice streams and marine ice basins, which are below sea level, provides less basal friction to the ice owing to a looser sediment material, compared to denser bed materials in rockier regions above sea level. We here assume  $\phi_{\min} = 2^\circ$  for marine beds below  $b_{\min} = -700 \text{ m}$  below sea level and  $\phi_{\max} = 50^\circ$  for elevations above

190  $b_{\max} = 500\text{m}$ , with a linear interpolation between these two values for intermediate bed elevations:

$$\phi = \begin{cases} \phi_{\min}, & b \leq b_{\min}, \\ \phi_{\min} + \frac{\phi_{\max} - \phi_{\min}}{b_{\max} - b_{\min}}(b - b_{\min}), & b_{\min} < b < b_{\max}, \\ \phi_{\max}, & b_{\max} \leq b. \end{cases} \quad (3)$$

The basal hydrology is described by a simple parameterization, where the subglacial meltwater accumulates locally in the till layer and adds to the effective water thickness  $W$  of the subglacial substrate (Tulaczyk et al., 2000):

$$\frac{\partial W}{\partial t} = \frac{\dot{B}_b}{\rho_w} - C_d, \quad (4)$$

195 with basal melt rate  $\dot{B}_b$ , water density  $\rho_w$  and a fixed till water drainage rate  $C_d = 7\text{mm yr}^{-1}$ . The scheme is non-conserving, i.e., any excess meltwater above a substrate saturation thickness of  $W_{\max} = 2\text{m}$  is lost permanently. Using the effective water thickness of the till layer  $s = W/W_{\max}$  and the ice overburden pressure  $P_0 = \rho_i g H$  for a given ice thickness  $H$ , the effective till pressure is then parameterized following Tulaczyk et al. (2000) and Bueler and van Pelt (2015):

$$N = \min \left\{ P_0, N_0 \left( \frac{\delta P_0}{N_0} \right)^s 10^{(e_0/C_c)(1-s)} \right\}. \quad (5)$$

200 In this equation,  $e_0$  is the reference void ratio at the reference effective pressure  $N_0$  and  $C_c$  is the compressibility coefficient of the sediment. The values of these constant parameters are adopted from Tulaczyk et al. (2000). The parameter  $\delta$  (here set to ~~4%~~ 4%) controls the lower bound of the effective pressure with  $\delta P_0 \leq N \leq P_0$  for  $0 \leq s \leq 1$ .

Iceberg calving at the margins of the floating ice shelves is accounted for via the ‘eigencalving’ approach (Levermann et al., 2012), where the average calving rate is computed from the product of the principal components of the horizontal strain rates derived from the SSA velocities at the shelf front, using a proportionality factor of  $K = 1 \cdot 10^{16}\text{ms}$ . In addition to this  
205 mechanism, ice shelves are also removed if they become thinner than a minimum thickness threshold of ~~50m~~ 50m or extend beyond the observed present-day ice fronts, as defined by Bedmap2 (Fretwell et al., 2013). The latter two calving conditions are mainly imposed due to numerical reasons and have only negligible influence on the overall ice-sheet dynamical evolution.

During the historical ~~validation period used for the calibration~~ of dEBM-simple, PISM is further run with a standard  
210 PDD model (Calov and Greve, 2005) for comparative reasons, using default degree-day factors for snow and ice of  $f_s = 3.3\text{mm w.e. (PDD)}^{-1}$  and  $f_i = 8.8\text{mm w.e. (PDD)}^{-1}$ , respectively (Hock, 2003). All other parameters are the same as the ones used in the dEBM-simple experiments.

Glacial isostatic adjustment of the underlying bedrock in response to ice mass changes is neglected here in order to isolate the ice mass changes resulting directly from modeled climatic mass balance and albedo changes, which is the focus of this  
215 paper.

For an overview of ice-sheet model parameters and their adopted values used in this study, see Table S1.

## 2.2 Adapted diurnal Energy Balance Model (dEBM-simple)

### 2.2.1 General overview

To compute the surface melt of the ice sheet from given solar insolation and atmospheric conditions, an adapted version of the “simple” diurnal Energy Balance Model, first introduced by Krebs-Kanzow et al. (2018), has recently been implemented as a surface mass balance module in PISM (dEBM-simple; Zeitz et al., 2021). Being more physically constrained, yet computationally comparably efficient, this surface melt scheme replaces the even simpler empirical positive degree-day (PDD) method (Reeh, 1991; Calov and Greve, 2005), which is usually used in PISM to calculate surface melt rates in long-term continental simulations. The dEBM-simple is based on the surface energy balance of the daily melt period and simulates insolation- and temperature-driven surface melting from changes in surface albedo and seasonal as well as latitudinal variations of the daily insolation cycle.

The melt formulation requires only monthly mean air temperature fields as input, yet implicitly accounts for the diurnal cycle of shortwave radiation. To serve as a ~~full-fledged~~ fully-fledged surface mass balance module in standalone model simulation runs, the implementation of the dEBM-simple in PISM further takes monthly mean precipitation fields as inputs to compute the full climatic mass balance. Thereby, precipitation is passed unaltered through the scheme, while the respective shares of snowfall and rain are determined from the local air temperature, with rain above 2 °C, snow at temperatures below 0 °C, and a linear transition in between. In contrast to Krebs-Kanzow et al. (2018), solar shortwave radiation and broadband albedo are parameterized internally, as described in the following sections.

The main differences of the “simple” version of the dEBM in comparison to the more complex “full” version (Krebs-Kanzow et al., 2021) relate to the calculation of incoming shortwave and longwave radiation flux at the ice surface, which in the full scheme are based on locally varying atmospheric emissivity and transmissivity and take into account sub-monthly changes in cloud cover. Furthermore, the full dEBM features a dedicated albedo scheme and computes refreezing on the basis of negative net surface energy fluxes. However, as the aim of dEBM-simple and the present work is to replace the empirically based PDD melting scheme in PISM with a more physically based alternative without having to rely on more input variables from regional climate models, we employ the simpler variant based on Krebs-Kanzow et al. (2018) instead of the “full” dEBM scheme.

### 2.2.2 Surface melt

The implementation of the dEBM-simple in PISM is based on the dEBM formulation given in Krebs-Kanzow et al. (2018), but adopts a few modifications in order to make the scheme as simple as possible in terms of required inputs and computational expense. These modifications mainly concern the treatment of albedo and shortwave radiation and are described in more detail below.

The dEBM melt equation is the heart of the module and describes the average surface melt rate during the diurnal melt period, when the surface temperature of the surface layer is at the melting point and the net energy uptake of the surface resulting from incoming shortwave radiation and near-surface air temperature is positive. In the dEBM, the melt period  $\Delta t_{\Phi}$  of a full day  $\Delta t$  is defined as the time span during which the sun is above a minimum elevation angle  $\Phi$ . The dEBM-simple utilizes a spatially



250 and temporally constant value for  $\Phi$  that can roughly be estimated based on typical summer insolation and snow albedo values (Krebs-Kanzow et al., 2018). The (daily) *insolation-dependent* melt contribution is computed from daily average incoming solar shortwave radiation at the ice surface, based on the incoming solar shortwave radiation at the top of the atmosphere (TOA)  $SW_{\Phi}$  during the melt period and atmospheric transmissivity  $\tau$  (for details, see Sect. 2.2.3) as well as the surface albedo  $\alpha$  (see Sect. 2.2.4) (Krebs-Kanzow et al., 2018; Zeitz et al., 2021). This term is balanced by a negative melt potential (offset),  
 255 which represents the outgoing longwave radiation flux and is mostly constant if the surface is near the melting point. The *temperature-dependent* melt contribution is a function of the cumulative temperature  $T_{\text{eff}}$  exceeding the melting point per month and is calculated from the normal probability distribution of the stochastically fluctuating daily temperatures around the long-term monthly mean temperature using a constant standard deviation (Krebs-Kanzow et al., 2018, 2021; Zeitz et al., 2021; Sect. 2.2.5). Finally, it is assumed that no melting can occur if the monthly mean near-surface air temperature  $\bar{T}$  is below a  
 260 typical threshold temperature  $T_{\text{min}}$ , regardless of the amount of insolation-dependent melt. Daily average melt rates are then calculated according to

$$M = \frac{\Delta t_{\Phi}}{\Delta t \rho_w L_m} [(1 - \alpha)\tau SW_{\Phi} + c_1 T_{\text{eff}} + c_2] \text{ if } \bar{T} > T_{\text{min}}, \quad (6)$$

with fresh water density  $\rho_w$  and latent heat of melt  $L_m$  (see Table 1 for values). The two empirical dEBM-simple tuning parameters,  $c_1$  and  $c_2$ , have constant values (in contrast to the “full” dEBM scheme; Krebs-Kanzow et al., 2021) which are  
 265 obtained by optimizing the scheme to historical RACMO2.3p2 melt data using a model ensemble (see Sect. 4).

Melt affects the actual ice-sheet thickness depending on the current thickness of the snow layer, as the available melt potential is used to first melt the snow layer before melting the underlying ice if excess melt energy is still available. Refreezing of surface meltwater is estimated on the basis of a constant fraction (~~here taken to be 50% of the melt volume for both snow and ice~~), positively adding to the surface mass balance. Meltwater that does not refreeze adds to the runoff. Because the assumption of a (temporally and spatially) fixed scalar value for the refreeze factor is arguably only a crude representation of a complex process that exhibits considerable spatial and temporal variability, we account for the associated uncertainty in modeled surface meltwater runoff by running the model simulations with two different parameter values, which are derived from RACMO output (Fig. S1): a high refreeze fraction of  $\theta = 90\%$  of the melt volume for both snow and ice, which is more representative of present-day climatic conditions (Fig. S1a), and a lower refreeze fraction of  $\theta = 50\%$  that is more  
 270 representative of end-of-century climatic conditions under a SSP5-8.5 warming scenario (Fig. S1b), with the latter value serving as the default for the prognostic (future) simulations. Note that the choice of  $\theta$  does not affect the calibration of the dEBM-simple parameters, as this is based solely on the comparison of melt rates.

### 2.2.3 Solar radiation

As a modification from the dEBM formulation given in Krebs-Kanzow et al. (2018), incoming solar shortwave radiation at the  
 280 ice surface is not needed as input, but is parameterized within dEBM-simple from the geometric characteristics of the Earth’s orbit around the sun and a simple linear model of the average atmospheric conditions (Zeitz et al., 2021). This reduces the

required input data from regional climate models and allows for an easy adjustment of orbital parameters, thus widening the application spectrum of dEBM-simple for glacial-cycle timescales.

285 The daily average TOA insolation during the daily melt period  $SW_{\phi}$  is computed according to Eq. (5) from Zeitz et al. (2021), using a solar constant of  $S_0 = 1,366 \text{ W m}^{-2}$  and values for the solar declination angle and the sun–earth distance which are approximated based on trigonometric expansions and depending on the day of the year using present-day orbital configurations<sup>1</sup>. We then compute the incoming shortwave radiation at the ice surface from the TOA insolation, assuming a linear dependence of atmospheric transmissivity  $\tau$  on the ice surface altitude  $z$  (for details, see Zeitz et al., 2021):

$$\tau = a_{\tau} + b_{\tau} \cdot z \quad (7)$$

290 The parameters  $a_{\tau}$  and  $b_{\tau}$  are obtained from a linear regression fit of RACMO2.3p2 data averaged over the austral summer months with the highest monthly TOA insolation December, December and January from 1950 to 2015 (Fig. S2). Their best fit values are listed in Table 1.

#### 2.2.4 Albedo

The albedo of the snow or ice surface is a particularly crucial component of the surface energy balance, as it determines the amount of solar radiation that is absorbed by the ice, and thus the amount of heat available to cause the surface to melt. While PISM-dEBM-simple offers the capability to read in time-dependent albedo fields as an input, we here make use of an efficient non-linear albedo parameterization in dEBM-simple, which computes the surface albedo iteratively based on the melt in the last time step and thus allows us to run standalone long-term simulations for which albedo output from more sophisticated regional climate and snowpack models is not available. Starting from a prescribed maximal value (represented by a typical dry fresh-snow albedo value) for regions with no melting, the parameterization assumes that the surface albedo decreases linearly with intensifying melt to a prescribed minimal value (represented by a typical bare-ice albedo value), thus internally accounting for the melt–albedo feedback (Zeitz et al., 2021):

$$\alpha = \max[a_{\alpha} + b_{\alpha} \cdot M, \alpha_{\min}] \quad (8)$$

305 The parameters  $a_{\alpha}$  (which represents the maximum albedo value  $\alpha_{\max}$ ) and  $b_{\alpha}$  are obtained from a linear regression fit of RACMO2.3p2 data averaged over the austral summer months December to February (DJF) from 2085 to 2100 following a SSP5-8.5 warming scenario (Fig. S3). The averaging period under the warmer late-21<sup>st</sup>-century conditions was chosen because the RACMO data show no clear dependence between [Antarctic-wide monthly mean](#) melt and albedo values under historic and present-day climate conditions, where melt rates over most of the ice sheet are too low to cause significant changes in albedo. The best fit values for these parameters, together with the minimum albedo value  $\alpha_{\min}$ , are listed in Table 1.

<sup>1</sup>Note that orbital parameters can easily be adapted for paleo-timescale applications within dEBM-simple.

## 310 2.2.5 Temperature

Following the approach from Krebs-Kanzow et al. (2018), dEBM-simple uses a stochastic positive degree-day (PDD) method (Reeh, 1991; Braithwaite, 1985) to estimate the effective temperature  $T_{\text{eff}}$  during the melt period which builds the basis for the temperature-dependent part of the melt equation (Eq. (6), second term). This empirical relation assumes that the temperature-dependent part of the melt equation is proportional to the cumulative surface air temperature excess above the melting point  
315 in a given month that can be described by a normal probability distribution of the fluctuating daily temperatures  $T$  around the long-term monthly mean temperature  $\bar{T}$  (Krebs-Kanzow et al., 2018; Calov and Greve, 2005), where the latter is provided as an input from a regional climate model:

$$T_{\text{eff}}(\bar{T}, \sigma_{\text{PDD}}) = \frac{1}{\sigma_{\text{PDD}} \sqrt{2\pi}} \int_0^{\infty} dT T \exp\left(-\frac{(T - \bar{T})^2}{2\sigma_{\text{PDD}}^2}\right) \quad (9)$$

In the above equation,  $\sigma_{\text{PDD}}$  denotes the constant and spatially uniform standard deviation of the daily temperature variability as well as further stochastic temperature variations around the monthly mean, which is taken to be 3.5 K (Albrecht et al.,  
320 2020; Krebs-Kanzow et al., 2018, 2021). The melting point is at  $T_0 = 0^\circ\text{C}$ .

## 3 Experimental design

In the following subsections we provide a summary of how the initial ice-sheet model state used for the experiments is derived (Sect. 3.1) and describe the climate forcing which is applied as a boundary condition in the experiments at the ice surface and  
325 at the ice–ocean boundary (Sect. 3.2). In the last part of the section, we describe the future warming scenarios used to drive the prognostic model simulations (Sect. 3.3).

### 3.1 Initial ice-sheet configuration

The simulations are initialized from a model state of the Antarctic Ice Sheet that is representative of the ice sheet configuration in the second half of the 20<sup>th</sup> century. It is based on an equilibrium state that was prepared for ISMIP6, the Ice Sheet Model  
330 Intercomparison Project for CMIP6 (Coupled Model Intercomparison Project Phase 6), and is described in more detail in Reese et al. (2020). The initialization procedure comprises two main steps: First, starting from Bedmap2 ice-sheet geometry (Fretwell et al., 2013), a thermal spin-up simulation is run on a coarser (16 km) model grid for 400,000 years under fixed geometry until the ice sheet reaches a thermodynamic equilibrium with present-day climate. Climatic boundary conditions at the upper ice surface are provided by near-surface air temperature and precipitation fields from RACMOv2.3p2 (Wessem et al.,  
335 2018), averaged over the period 1986 to 2005, and at the ice–ocean interface by a data compilation from the World Ocean Atlas 2018 pre-release (Locarnini et al., 2019; Zweng et al., 2019), averaged over 1955 to 2017, and Schmidtko et al. (2014), averaged over the period 1975 to 2012 (for more details, see following section). Second, starting from this thermodynamic equilibrium state, a simulation ensemble spanning over various values of critical model parameters related to basal sliding and sub-shelf melt is run on the 8 km model grid for another 22,000 years under the same climatic boundary conditions with

**Table 1.** List of physical constants and parameters used in PISM-dEBM-simple alongside their respective default values adopted for this study. Parameter values marked with an asterisk (\*) are optimized according to the calibration procedures detailed in the text.

| Symbol                                                      | Parameter                                                   | Default value                   | Unit                                    |
|-------------------------------------------------------------|-------------------------------------------------------------|---------------------------------|-----------------------------------------|
| $S_0$                                                       | Solar constant                                              | 1,366                           | $\text{W m}^{-2}$                       |
| $g$                                                         | Gravitational acceleration                                  | 9.81                            | $\text{ms}^{-2}$                        |
| $\sigma$                                                    | Stefan-Boltzmann constant                                   | $5.67 \cdot 10^{-8}$            | $\text{W m}^{-2} \text{K}^{-4}$         |
| $L_m$                                                       | Latent heat of melt of ice                                  | $3.34 \cdot 10^5$               | $\text{J kg}^{-1}$                      |
| $\rho_i$                                                    | Ice density                                                 | 910                             | $\text{kg m}^{-3}$                      |
| $\rho_w$                                                    | Fresh water density                                         | 1,000                           | $\text{kg m}^{-3}$                      |
| $T_0$                                                       | Melting point temperature                                   | 0                               | $^{\circ}\text{C}$                      |
| $\epsilon_i$                                                | Longwave emissivity of ice                                  | 0.95                            | —                                       |
| $\Phi$                                                      | Minimum solar elevation angle for melt                      | 17.5                            | $^{\circ}$                              |
| $c_1$                                                       | dEBM tuning parameter                                       | <del>25.5</del> <u>27.5</u> *   | $\text{W m}^{-2} \text{K}^{-1}$         |
| $c_2$                                                       | dEBM tuning parameter                                       | <del>-80.0</del> <u>-78.0</u> * | $\text{W m}^{-2}$                       |
| $T_{\min}$                                                  | Threshold temperature for melt                              | -10.0*                          | $^{\circ}\text{C}$                      |
| $\hat{\alpha}$                                              | Exchange coefficient for sensible heat flux ( $c_1$ )       | 4                               | $\text{W s m}^{-3} \text{K}^{-1}$       |
| $\sigma_{\text{PDD}}$                                       | Standard deviation of daily surface air temperatures        | 3.5                             | K                                       |
| $a_{\tau}$                                                  | Intercept in atmospheric transmissivity parameterization    | 0.70*                           | —                                       |
| $b_{\tau}$                                                  | Slope in atmospheric transmissivity parameterization        | $3.6 \cdot 10^{-5}$ *           | $\text{m}^{-1}$                         |
| $a_{\alpha} / \alpha_{\max}$                                | Intercept in albedo parameterization / maximal albedo value | 0.86*                           | —                                       |
| $b_{\alpha}$                                                | Slope in albedo parameterization                            | -740.4*                         | $(\text{kg m}^{-2} \text{s}^{-1})^{-1}$ |
| $\alpha_{\min}$                                             | Minimal albedo value                                        | 0.47                            | —                                       |
| <del><math>\theta_s</math></del> <u><math>\theta</math></u> | <del>Refreeze fraction snow-</del>                          | 0.5 ( <u>0.9</u> )†             | —                                       |

~~$\theta_s$~~  Refreeze fraction ice 0.5 — height

†The prognostic warming simulations presented here employ  $\theta = 0.5$  (representative of end-of-century climatic conditions under a SSP5-8.5 warming scenario) as the default. The value given in parentheses (representative of present-day climatic conditions) is used in the historical simulations and for the uncertainty estimation. More details in the text.

- 340 fully evolving physics until the ice sheet reaches a ~~dynamic equilibrium state~~ state sufficiently close to equilibrium and ice volume changes become negligible. In the course of these simulations, a comprehensive ensemble scoring scheme is applied after 5,000 years and again after 12,000 years in order to select the ensemble member which compares best to present-day observations of ice geometry (Fretwell et al., 2013) and velocities (Rignot et al., 2011). During the entire spin-up, the climatic mass balance (net surface accumulation/ablation rate) and ice surface temperature are directly prescribed from the RACMO.
- 345 For more details on the spin-up and the scoring scheme, see Reese et al. (2020).

## 3.2 Climate forcing

### 3.2.1 Air temperature and precipitation

At the ice–atmosphere interface, the climatic boundary conditions (near-surface air temperature and precipitation flux) for dEBM-simple are provided from the [polar](#) regional atmospheric climate model RACMOv2.3p2 (Wessem et al., 2018) using  
350 simulations covering the period 1950 to 2100. Specifically, we use a historical simulation (1950–2015) and a future projection (2015–2100), which both were generated under climate forcing from the CMIP6-type global coupled climate model CESM2 (Community Earth System Model version 2; Danabasoglu et al., 2020). In a recent intercomparison of five different regional climate models for Antarctica (Mottram et al., 2021) RACMO2.3p2 has been shown to be among the best-performing models when comparing against observations (both in terms of surface air temperatures and surface mass balance) and RACMO’s simulated mean annual Antarctic-wide integrated surface mass balance matches the ensemble mean  
355 closest among all ensemble members. ~~Trusel et al. (2013) also compared meltwater fluxes from an older version of RACMO~~  
[RACMO2.3p2 has a comparatively high horizontal and vertical resolution, employs upper-air nudging of temperature and wind fields, and includes a rather sophisticated surface scheme that features a multi-layer snow model calculating meltwater production, percolation, refreezing, and runoff and can account for albedo changes as well as horizontal transport of snow.](#)  
360 [Comparisons with observations have shown that RACMO has a slight \( \$\sim -0.5\$  K\) cold bias at the surface, resulting in a slight negative bias in modeled surface mass balance and melt rates \(Jakobs et al., 2020\). Comparing RACMO meltwater fluxes with satellite-derived estimates for the period ~~1999–2000~~ to 2009 ~~and from QuikSCAT \(Trusel et al., 2013\), Wessem et al. \(2018\)~~  
\[also found a good spatio-temporal agreement between both. While the overall performance is good, small differences exist around the margins of the ice sheet. On the Antarctic Peninsula, RACMO predicts more melt in the northern part of Larsen\]\(#\)  
365 \[Ice Shelf, whereas melt is underestimated in the southwestern part. The largest underestimation is shown for Wilkins Ice Shelf on the western Antarctic Peninsula. A comparison of present-day \\(2000–2009 mean\\) melt rates between RACMO and QuikSCAT-derived estimates is given in Fig. S4.\]\(#\)](#)

The temperature and precipitation fields from RACMO are provided to PISM at a monthly time step in order to resolve the climatological annual cycle and are [bilinearly](#) interpolated from the 27 km RACMO grid to the 8 km PISM grid. Note that we  
370 here treat all monthly input values as piecewise-constant, i.e., both the air temperature and precipitation values from RACMO are assumed to represent the monthly mean that is valid over the entire course of the month, which is in contrast to the default behavior of PISM where air temperature inputs are interpolated between consecutive forcing data points (see Appendix A for more details).

To account for the surface-elevation–melt feedback, local surface air temperatures are further downscaled according to  
375 changes in the ice surface elevation, assuming a spatially uniform atmospheric temperature lapse rate of  $\Gamma = -8.2 \text{ K km}^{-1}$ . The precipitation field is independent of the evolving ice-sheet geometry. ~~During the model, meaning that orography–precipitation interactions (such as a local increase in precipitation when a substantial lowering of the ice-sheet surface leads to a lapse-rate-induced warming and thus a higher moisture-holding capacity of the air layers over the ice-sheet surface) are not accounted for. In the historical~~  
[calibration experiments, the ice-sheet geometry is kept ~~constant and hence the temperature lapse rate fixed and thus~~](#)

380 this lapse rate effect does not apply. Hence, while the absence of orography–precipitation interactions has no effect during calibration, this missing effect could have a slightly mitigating effect on ice-sheet surface elevation changes in the future warming simulations.

### 3.2.2 Ocean thermohaline forcing

At the ice–ocean boundary layer, we use the Potsdam Ice-shelf Cavity mOdel (PICO; Reese et al., 2018) to simulate ocean-  
385 induced melting below the ice shelves. PICO extends the box model approach by Olbers and Hellmer (2010) for the use in  
3-dimensional ice-sheet models and thus enables the computation of sub-shelf melt rates consistent with the vertical overturning  
circulation in the ice-shelf cavities under evolving geometric conditions and in a computationally efficient manner. Oceanic  
inputs for PICO are provided by observed fields of ocean temperature and salinity at the sea floor on the continental shelf, based  
on a data compilation from the World Ocean Atlas 2018 pre-release (Locarnini et al., 2019; Zweng et al., 2019), averaged over  
390 1955 to 2017, and Schmidtko et al. (2014), averaged over the period 1975 to 2012. The specifics of the data compilation  
are described in more detail in Reese et al. (2020). PICO’s two main parameters relate to the strength of the overturning  
circulation and the vertical heat exchange across the ice-shelf–ocean boundary layer and have values of  $C = 1 \text{ Sv m}^3 \text{ kg}^{-1}$  and  
 $\gamma_T = 3 \cdot 10^{-5} \text{ m s}^{-1}$ , respectively, which are tuned to yield melt rates that compare well to present-day observations (Reese  
et al., 2020).

### 395 3.3 Future warming scenarios

To estimate the evolution of Antarctic surface melt under warmer than present conditions, PISM-dEBM-simple is forced using  
a 21<sup>st</sup>-century warming scenario from RACMO2.3p2 driven by CESM2 and following the Shared Socioeconomic Pathway  
SSP5-8.5 (Riahi et al., 2017) emission scenario. This scenario represents the highest anthropogenic greenhouse gas emission  
scenario used by the Intergovernmental Panel on Climate Change (IPCC) and is chosen here to serve as an upper-bound  
400 estimate of Antarctic surface melt evolution and resulting ice mass losses under progressing anthropogenic climate change.  
Note, however, that historical total cumulative CO<sub>2</sub> emissions are in close agreement (within ~~±1%~~ ±1% for the period 2005–  
2020) with the RCP8.5 emission scenario (the equivalent Representative Concentration Pathway to SSP5-8.5 in terms of  
radiative forcing) and as of now the RCP8.5 scenario represents the best prediction of mid-century CO<sub>2</sub> concentration levels  
under current and intended policies (Schwalm et al., 2020). Further, recent comparisons of projected and observed ice-sheet  
405 losses from Antarctica have shown that the sea-level equivalent mass losses from the Antarctic Ice Sheet closely track the high  
end of future sea-level rise projections from the IPCC’s Fifth Assessment Report (Slater and Shepherd, 2018; Slater et al.,  
2020).

To explore the ~~long-term effects~~ committed impacts of elevated surface melt on the dynamics of the Antarctic Ice Sheet  
and to estimate the influence the surface-elevation–melt feedback has on the ice sheet, the SSP5-8.5 simulations are extended  
410 beyond the end of the available RACMO climate forcing after the year 2100 assuming a steady late-21<sup>st</sup>-century climate with  
no further trend. To this aim, the model is forced from 2100 on-wards until the year ~~3000~~ 5000 with a periodic (1-year) monthly  
atmospheric climatology which is derived from multi-year monthly averages of the decade 2090–2100. This climatic forcing is

then kept unchanged throughout the remainder of the simulations irrespective of ice topography changes, whereas the surface air temperature is still allowed to adapt to changes in the ice surface elevation via the lapse rate effect. By the end of these  
415 simulations, the ice sheet can be expected to be sufficiently close to equilibrium with the climatic boundary conditions.

Because the main focus of this paper is on the ice sheet’s dynamic behavior and response due to changes in the climatic conditions at the ice surface, the forcing at the ice–ocean boundary is fixed throughout the entire simulations. These results thus do not represent realistic projections of the future evolution of the ice sheet. Instead, they likely underestimate total mass loss owing to the disregard of mass losses from increased sub-shelf melting.

#### 420 4 Model parameter calibration

In a first step, the three main model tuning parameters of dEBM-simple, namely the uncertain constant coefficients  $c_1$  and  $c_2$  from Eq. (6) and the threshold temperature  $T_{\min}$  below which no melt should occur (Krebs-Kanzow et al., 2018), are constrained by calibrating the scheme to correctly reproduce historical and present-day spatial and temporal Antarctic melt patterns. ~~Therefore~~ Therefor, an ensemble of fixed-geometry historical simulations is run with PISM-dEBM-simple under monthly  
425 1950–2015 atmospheric boundary conditions from RACMO (see Sect. 3.2.1), spanning all possible parameter combinations of  $c_1$ ,  $c_2$ , and  $T_{\min}$ , using a physically motivated best-guess, a minimum, and a maximum plausible value for each of the parameters, respectively (in total  $3^3$  realizations).

The optimal parameter set of the calibrated scheme is then selected by scoring the ensemble of historical simulations with respect to RACMO output, taking into account the whole ~~historie~~ historical period (1950–2015), but also laying a specific  
430 focus on the scheme’s ability to reproduce present-day melt patterns. As a performance score over the historical period we compute the product of the temporal root-mean-square error of yearly total surface melt and the spatial root-mean-square error of surface melt rates averaged over the melting season (DJF). The performance score for present day is computed from the product of the slope and the Pearson correlation coefficient ( $R$ -value) of a linear regression fit of 2005–2015 mean summer melt rates computed by dEBM-simple with respect to RACMO. The final score of an ensemble member is then computed as  
435 the product of the normalized two individual scores.

The parameter  $c_1$  represents the sensitivity of the melt equation (Eq. (6)) to the temperature difference between the melting surface and near-surface air. As in Krebs-Kanzow et al. (2018), we define  $c_1 = 3.5 \text{ W m}^{-2} \text{ K}^{-1} + \hat{\alpha} u$ , accounting for contributions from temperature-dependent longwave radiation and turbulent sensible heat flux, with the latter being linked to surface wind speed  $u$  via an exchange coefficient  $\hat{\alpha}$ . We here choose  $\hat{\alpha} = 4 \text{ W s m}^{-3} \text{ K}^{-1}$  in accordance with estimates at low altitudes  
440 by Braithwaite (2009). Given a RACMO-simulated 1950 to 2015 mean summer ~~median~~ wind speed at 10 m above ground of  ~~$5.1 \pm 1.7 \text{ ms}^{-1}$~~   $5.3 \pm 1.7 \text{ ms}^{-1}$  over the lower ( $< 2,000 \text{ m}$ ) parts of the ice sheet (Fig. S5), the minimum plausible, best-guess, and maximum plausible value of  $c_1$  are set to [~~21.5, 23.5, 25.5~~ 25.5, 27.5, 29.5]  $\text{W m}^{-2} \text{ K}^{-1}$ , respectively, which corresponds to wind speeds of [~~4.5, 5.0, 5.5~~ 5.5, 6.0, 6.5]  $\text{ms}^{-1}$ . Instead of using the full range of one standard deviation around the ~~median~~ mean value as estimates for the minimum and maximum plausible values, we thereby restrict the plausible parameter range  
445 based on initial sensitivity simulations, such that unrealistically high and low melt rates are discarded.

The melt offset parameter  $c_2$  represents the longwave outgoing radiation. It can in principle be derived from local ice and atmospheric characteristics (Eq. (7) in Krebs-Kanzow et al., 2018), however, using the value given in Krebs-Kanzow et al. (2018) overestimates surface melt over the ice sheet by at least a factor of two. The plausible range for this parameter is therefore set to  $[-79, -80, -81, -78, -79, -80]$   $\text{W m}^{-2}$ . Assuming a longwave emissivity of ice of  $\epsilon_i = 0.95$ , these values suggest an atmospheric emissivity of about  $0.73$ – $0.74$ , which is in agreement with clear-sky values found under very dry air conditions on the Antarctic Ice Sheet (Busetto et al., 2013).

The plausible range of the melting threshold temperature  $T_{\min}$ , which is used as a background melting condition in the dEBM, is estimated by analyzing historical RACMO surface melt rates with respect to near-surface air temperatures and set to  $[-10, -11, -12]$   $^{\circ}\text{C}$  (Fig. S6).

All other dEBM-simple model parameters (including the albedo and atmospheric transmissivity parameterizations) are set to their respective default values that are given in Table 1. To isolate the computed melt rates from indirect effects of ice dynamics, such as, for example, melt increases caused by lapse rate-induced surface air temperature changes resulting from dynamic ice-sheet thinning, the ice-sheet geometry is fixed in its present-day configuration. To ensure a consistent comparison, we apply a common ice surface mask for the RACMO and PISM melt fields in all analyses presented here (cf. Hansen et al., 2022).

## 5 Results

### 5.1 Model validation/evaluation: Historical and present-day melt rates

To evaluate the performance of the calibrated surface melt scheme, we here compare the evolution of Antarctic surface melt over the historical period and for the present-day state as modeled by PISM-dEBM-simple with respect to outputs from RACMO2.3p2, as well as to observation-based estimates derived from QuikSCAT for the decade 2000 to 2009. For comparative reasons, we also compare dEBM-simple-derived melt rates with melt rates produced using PISM's standard PDD melt scheme. The experimental setup and the calibration procedure are described above in Sect. 4. The Antarctic-calibrated optimal values for the three main dEBM tuning parameters  $c_1$ ,  $c_2$ , and  $T_{\min}$  resulting from the performance scoring of the tuning ensemble are given in Table 1.

The evolution of total Antarctic surface melt over the historical period (1950–2015) as computed by the calibrated model setup (Fig. 1) shows that PISM-dEBM-simple is generally able to reproduce the overall magnitudes and temporal patterns of Antarctic surface melt modeled by RACMO2.3p2 for both yearly and monthly cumulative melt fluxes (Figs<sup>2</sup> cumulative melt volume fluxes (Fig. 1a–b). Overall interannual variability and trend-trends in the yearly total surface melt flux are captured by the model and track the historical evolution of surface melt diagnosed by RACMO (Fig. 1a). In particular, for the period 2000 to 2009, annual total surface melt volumes fall within the observed QuikSCAT range of  $101 \pm 24 \text{ Gt yr}^{-1}$  (mean and standard deviation) (Fig. 1a). Considerable deviations in yearly total melt fluxes between dEBM-simple and RACMO output

<sup>2</sup>Note that for better comparability monthly melt values are also presented in units of  $\text{Gt yr}^{-1}$ , i.e., mean annual melt volume flux values.



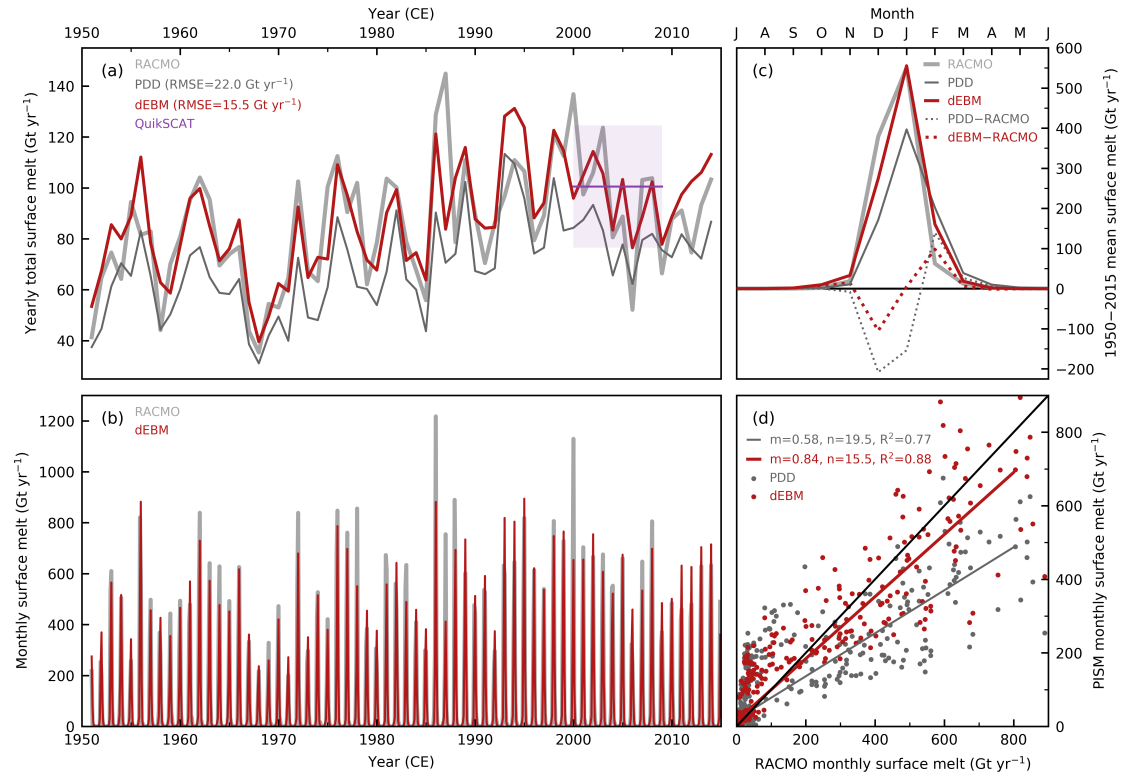

**Figure 1. Evolution of total Antarctic surface melt over the historical period computed by dEBM-simple and comparison to RACMO and PDD.** (a) Antarctic-wide integrated yearly total surface melt flux (in gigatons per year,  $\text{Gt yr}^{-1}$ ) as calculated with PISM-dEBM-simple in the calibrated historical (1950–2015) run (red line). The light gray line shows the yearly melt flux predicted by RACMO2.3p2, and the thin dark gray line the melt predicted using PISM with a standard positive degree-day (PDD) melt scheme. [For dEBM-simple and PDD the root-mean-square errors \(RMSE\) of yearly total melt fluxes with respect to RACMO are given. Observation-based estimates for the period 2000 to 2009 \(mean and standard deviation\) based on QuikSCAT data \(Trusel et al., 2013\) are shown in purple.](#) (b) Monthly surface melt flux (in  $\text{Gt yr}^{-1}$ ) from dEBM-simple (red line) and RACMO (light gray line). [Note that for better comparability monthly values are also given in units of  \$\text{Gt yr}^{-1}\$ , i.e., annual flux values.](#) (c) Multi-year monthly averaged annual melt cycle (in  $\text{Gt yr}^{-1}$ ) as simulated by dEBM-simple (solid red line), RACMO (solid light gray line), and PDD (solid dark gray line). The dotted lines show the respective differences of melt computed by dEBM-simple and PDD relative to RACMO. (d) Total monthly surface melt fluxes from dEBM-simple and PDD in comparison to RACMO melt fluxes (in  $\text{Gt yr}^{-1}$ ) and linear regression fit of the data (colored solid lines). [m and n are the slope and intercept of the regression lines, respectively, and  \$R^2\$  the coefficient of determination.](#) The black line marks the identity line.

only occur for [some](#) extreme melt years and are caused mainly by the treatments of albedo and incoming surface radiation budget in dEBM-simple, which are unable to reproduce the variability of a more complex climate model like RACMO. The temporal root-mean-square error of the annual total surface melt flux computed by dEBM-simple with respect to RACMO

480 is ~~15.3 Gt yr<sup>-1</sup>~~ 15.5 Gt yr<sup>-1</sup> and thus approximately ~~only half of 30% less than~~ the error produced by the PDD scheme (~~26.9 Gt yr<sup>-1</sup>~~ 22.0 Gt yr<sup>-1</sup>; based on default PISM parameter choices).

~~In~~ The multi-year (1950–2015) average seasonal cycle of monthly surface melt fluxes (Fig. 1c) reveals that dEBM-simple captures the peak of the annual melting season as given by RACMO well, with virtually zero difference between both models in January when melt is most intense. However, in comparison to RACMO, dEBM-simple commonly underestimates melting 485 during the first half of the melting season by up to about 100 Gt yr<sup>-1</sup> and overestimates melting during the months following the annual melt peak in January by a similar amount, ~~as revealed by the multi-year (1950–2015) average seasonal cycle of monthly surface melt fluxes (Fig. 1c).~~ These deviations could be related to the monthly time step of the climate inputs which hampers the scheme to accurately reproduce onset and end of the annual melt season as well as to missing processes like, for example, non-radiative heat fluxes such as turbulent latent heat fluxes or conductive subsurface heat fluxes that are 490 not accounted for. The same bias occurs for the PDD melt as well, however, it is even more pronounced. In the latter case, the deviations are in parts amplified by the treatment of the monthly mean air temperature inputs, where the approach taken here using piecewise-constant temperatures over every full month (see Sect. 3.2.1) leads to slightly colder temperatures from mid-winter (~July/August) to the peak of the melting season in January, and slightly warmer temperatures during the rest of the year, as compared to the default interpolation approach (for more detail, see ~~also~~ Appendix A). Note that integrated over 495 the full year these deviations mostly cancel out for the dEBM-simple, whereas PDD remains with a ~~slight bias towards higher~~ bias towards lower melt rates.

Comparing monthly Antarctic-wide integrated surface melt rates from dEBM-simple and the PDD scheme with monthly melt rates diagnosed from RACMO yields a better linear regression fit for the dEBM-simple (coefficient of determination  $R^2 = 0.88$ ) than for the PDD scheme ( $R^2 = 0.77$ ) (Fig. 1d). Both parameterizations show increasing errors with intensifying 500 melt rates, with a positive bias in the lower to medium melt rates regime ( $\lesssim 200$  Gt yr<sup>-1</sup>; mainly February melt rates) and a negative bias for the higher melt rates regime ( $\gtrsim 200$  Gt yr<sup>-1</sup>; mainly December melt rates), however, the error is significantly smaller for the dEBM-simple –

(slope of regression line  $m = 0.84$ , as compared to PDD with  $m = 0.58$ ). A comparison of annual total Antarctic surface melt rates for all simulations of the dEBM-simple tuning ensemble with respect to RACMO is given in Fig. S7 and a Taylor 505 diagram summarizing the performance of the individual ensemble members is shown in Fig. S8.

The spatial distribution of calibrated present-day (2005–2015 DJF-mean) surface melt rates simulated with PISM-dEBM-simple in the historical calibration run as well as a comparison to the respective melt patterns diagnosed from RACMO is shown in Fig. 2. Over the vast majority of the Antarctic Ice Sheet's interior surface melt is zero or negligible under present-day conditions, while significant surface melt is restricted to a narrow band of low-elevation coastal zones and to the shelves 510 along the margins of the ice sheet north of about 75°S (Fig. 2a). In these areas, spanning along nearly the entire coastline of East Antarctica as well as along portions of the coast of West Antarctica bordering the Amundsen and Bellingshausen seas, surface melt rates reach values of up to ~~several a few~~ hundreds of millimeters water equivalent per year (mm w.e. yr<sup>-1</sup>); the most intense surface melt at present occurs in the Antarctic Peninsula region with maximum average melt rates exceeding

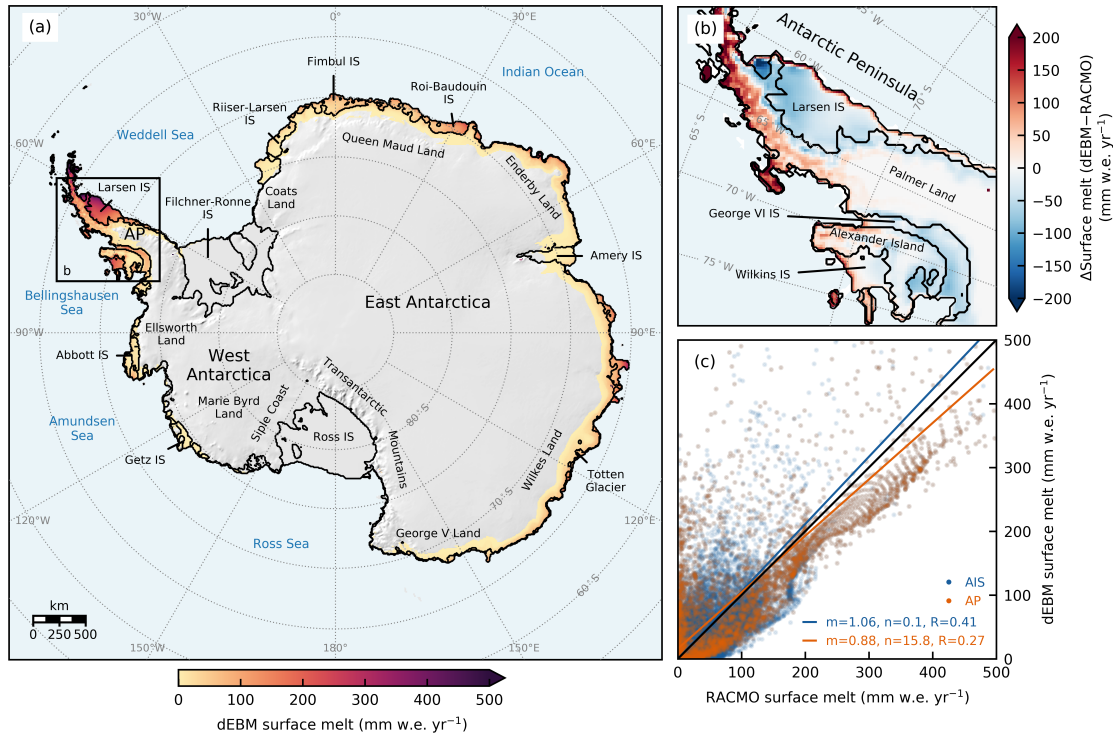

**Figure 2. Present-day Antarctic surface melt rates computed by dEBM-simple and comparison to RACMO.** (a) Map of Antarctic-mean 2005–2015 summer (December–February; DJF) Antarctic surface melt rates (in millimeters water equivalent per year, mm w.e. yr<sup>-1</sup>), as calculated with PISM-dEBM-simple in the calibrated historical run. Areas with melt rates below numerical significance (<0.001 mm w.e. yr<sup>-1</sup>) are masked. AP, Antarctic Peninsula; FRISIS, Filchner-Ronne Ice Shelf; LIS, Larsen Ice Shelf ice shelf. (b) Absolute difference of dEBM-simple minus RACMO-computed surface melt rates (in mm w.e. yr<sup>-1</sup>), averaged over the same period, shown for a zoomed-in section of the Antarctic Peninsula (AP), the region with the highest average melt rates, indicated by the black square in panel (a). (c) Scatter plot of dEBM-simple versus RACMO-computed summer-surface melt rates (in mm w.e. yr<sup>-1</sup>) and linear regression fits of the data (colored solid lines). Purple-Blue data points correspond to the whole Antarctic Ice Sheet (AIS), orange data points to the zoomed-in section of the Antarctic Peninsula (AP) shown in panel (b).  $m$  and  $n$  are the slope and intercept of the regression lines, respectively, and  $R$  is the Pearson correlation coefficient. The black line marks the identity line.

515 1000 mm w.e. yr<sup>-1</sup> about 400 mm w.e. yr<sup>-1</sup> at the northern margin of the Larsen Ice Shelf and 1000 mm w.e. yr<sup>-1</sup> towards the northernmost tip of the peninsula.

Comparing the present-day average surface melt patterns predicted by PISM-dEBM-simple with RACMOv2.3p2 in general yields a considerable agreement between the two (Figs Fig. 2b–c). While overall the dEBM-simple is able to reproduce the localization of melt areas as well as the wide range in surface melt intensities predicted by RACMO, the scheme seems to generally slightly underestimate melt rates in high-intensity melt regions and higher-intensity melt regions (i.e., mostly  
 520 low-elevation ice shelves) and slightly overestimate melt rates in low-intensity melt regions lower-intensity melt regions (e.g.,

grounded ice sheet margins of higher elevations, especially on the Antarctic Peninsula and along the coasts of Wilkes Land and Enderby Land in East Antarctica). The slope of the linear regression fit of grid-point-wise average present-day melt rates from dEBM-simple compared to RACMO is  $0.84$  ( $R=0.51$ )  $1.06$  (Pearson correlation coefficient  $R=0.41$ ) for the entire Antarctic Ice Sheet and  $0.69$  ( $R=0.52$ )  $0.88$  ( $R=0.27$ ) for the Antarctic Peninsula region (marked by the black square in Fig. 2a), the region with the highest average melt rates. ~~The~~ When considering the entire historical period, the values are very similar ( $m=1.07 / R=0.38$  for the whole ice sheet,  $m=0.92 / R=0.25$  for the Antarctic Peninsula; Fig. S9).

The distribution of present-day average surface melt rates modeled with PISM using a standard PDD scheme reveals a substantial overestimation of the average melt area over which significant melt occurs, stretching hundreds of kilometers inland almost along the entire coastline of the continent (Fig. S10). The corresponding linear regression fits for the PDD scheme over the historical period yield slopes of  $0.72$  ( $R=0.50$ )  $0.86$  ( $R=0.88$ ) for the entire Antarctic Ice Sheet and  $0.64$  ( $R=0.57$ )  $0.73$  ( $R=0.89$ ) for the Antarctic Peninsula region, respectively (Fig. S11), indicating that the bias of PDD-modeled melt rate estimates with respect to RACMO is at least two times that of the dEBM-simple.

A comparison of the spatial melt patterns predicted by PISM-dEBM-simple with the satellite-based melt estimates from QuikSCAT for the decade 2000 to 2009 shows that most of the discrepancies with respect to the observations are indeed 'inherited' from RACMO (Fig. S4), which is not surprising given that the scheme is specifically tuned to replicate the RACMO melt patterns (Fig. S12). Melting on the western Antarctic Peninsula on Wilkins and George VI ice shelves and on the southwestern Larsen Ice Shelf and eastern Amery Ice Shelf is also generally underestimated by dEBM-simple. The most notable differences with respect to RACMO are that the overall negative bias in surface melt rates is even more pronounced and the overall spread is higher (for the whole ice sheet, the slope and correlation coefficient of the regression fits for dEBM-simple and RACMO are  $m=0.70 / R=0.27$  and  $m=0.77 / R=0.74$ , respectively). Notably, while the overestimation by dEBM-simple of low-intensity melt in the higher-elevation Antarctic Peninsula is not seen in RACMO, the scheme shows a better match for the ice shelves of Queen Maud Land / East Antarctica.

## 5.2 Projected 21<sup>st</sup>-century surface melt evolution under SSP5-8.5 warming

The calibrated PISM-dEBM-simple is now used to run prognostic simulations in order to explore the evolution of Antarctic surface melt in the 21<sup>st</sup> century and its impact on the surface mass balance of the ice sheet under warmer than present atmospheric conditions. The atmospheric boundary forcing for the melt scheme is hereby given by CESM2-driven RACMO2.3p2 using an SSP5-8.5 warming scenario. More details regarding the used scenario are given in Sect. 3.3; the experimental setup is described in Sect. 3.2. In contrast to the model calibration runs presented in Sect. 4, the geometry and dynamics of the ice sheet are now allowed to evolve freely, i.e., the surface-elevation–melt feedback is now accounted for in addition to the melt–albedo feedback. Note that in all following simulations the refreezing of surface meltwater is calculated assuming a refreeze fraction of  $\theta=50\%$ . The effect of this parameter choice on the committed (long-term) evolution of the surface mass balance as well as the related uncertainty in resulting ice-sheet elevation changes is discussed below in Sect. 5.5.

Despite increasing trends in integrated surface melt and meltwater runoff over the course of the simulation, net mass losses from the ice-sheet surface are overcompensated by the increase in accumulation (snowfall), resulting in a ~~40%~~  $30\%$  increase

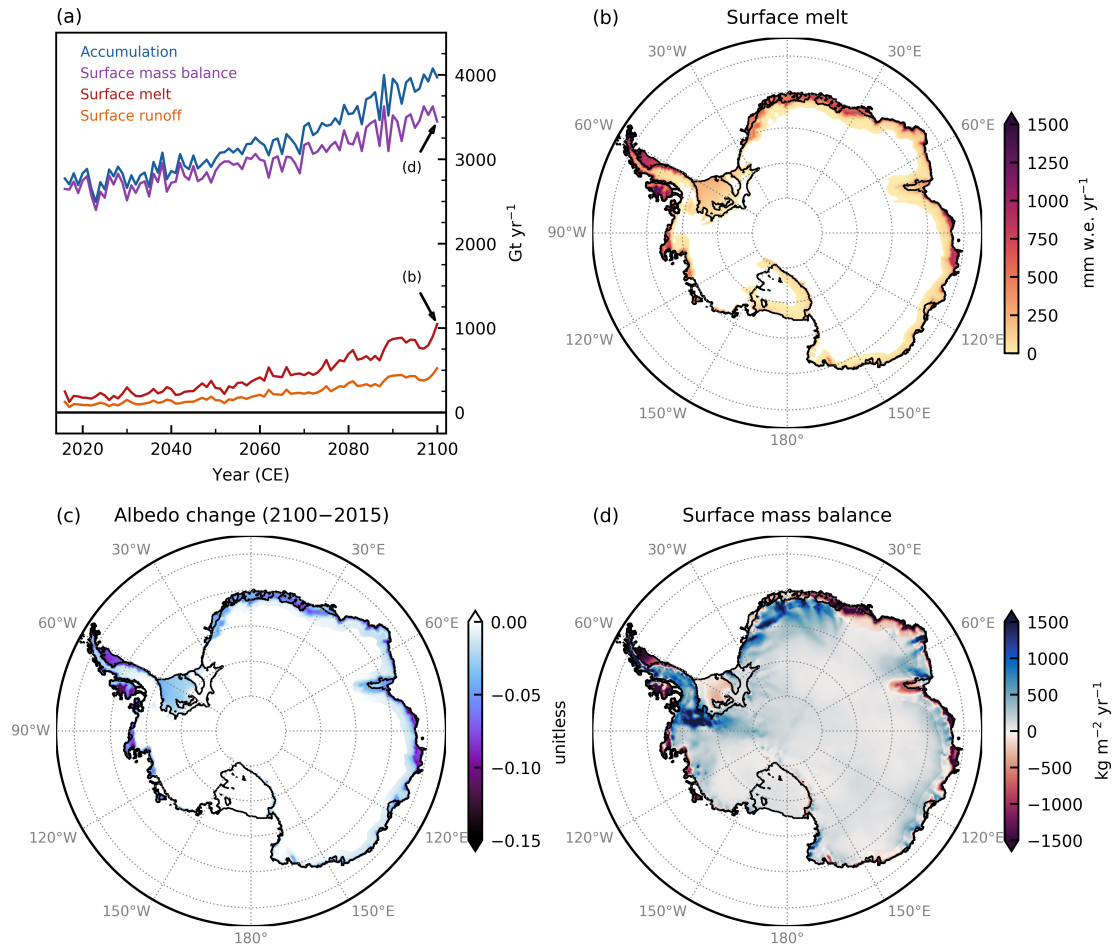

**Figure 3.** 21<sup>st</sup>-century evolution of Antarctic surface conditions as predicted by dEBM-simple following the SSP5-8.5 scenario. (a) Annual Antarctic-wide integrated surface mass balance components (in  $\text{Gt yr}^{-1}$ ) diagnosed by dEBM-simple using atmospheric boundary forcing from RACMO and assuming an SSP5-8.5 warming scenario. Note that for surface **melt and runoff**, positive values denote mass losses. (b–d) Annual mean dEBM-simple surface melt (in  $\text{mm w.e. yr}^{-1}$ ), surface albedo change relative to present day (unitless), and local climatic surface mass balance (in  $\text{kg m}^{-2} \text{yr}^{-1}$ ; note that  $1 \text{ kg m}^{-2} = 1 \text{ mm w.e.}$ ) in 2100.

555 of net surface mass balance rates by the end of the century compared to present day, with an average rate of increase of  
 more than ~~100~~90  $\text{Gt yr}^{-1}$  per decade (Fig. 3a). However, while the surface mass balance of the Antarctic Ice Sheet at  
 present is almost entirely determined by the amount of snowfall and surface meltwater runoff is negligible (~~~2%~~~3% of  
 the annual accumulation rates in terms of absolute magnitude when assuming a refreeze fraction of  $\theta = 0.5$  and  $< 1\%$  when  
assuming  $\theta = 0.9$ ), the abating impact of meltwater runoff on the surface mass balance grows to nearly 10%> 10% by the  
 560 end of the century. Antarctic-wide cumulative surface melt volume and meltwater runoff both increase nearly 8-fold from about

**Table 2.** Comparison of Antarctic-wide integrated surface mass balance components and respective standard deviations (in  $\text{Gt yr}^{-1}$ ) as simulated by PISM-dEBM-simple in the calibrated reference configuration, PISM using a standard PDD scheme, and the regional climate model RACMO2.3p2, and estimates based on Trusel et al. (2015) (T15), for present-day and end-of-century surface conditions assuming an SSP5-8.5 scenario. In the case of PISM, the surface mass balance (SMB) is given by the difference of accumulation and runoff. Present-day melt rates are also compared to observation-based estimates from QuikSCAT (Trusel et al., 2013) for the period 2000 to 2009. For the end-of-century surface conditions, melt rates from the Trusel et al. (2015) (T15) RCP8.5 GCM ensemble are also given for comparison.

|                              | SMB                                       | Accumulation                              | Melt                                  | RunoffRunoff*                                |
|------------------------------|-------------------------------------------|-------------------------------------------|---------------------------------------|----------------------------------------------|
| Present day (2005–2015 mean) |                                           |                                           |                                       |                                              |
| dEBM-simple                  | <del>2,598 ± 110</del> <u>2,632 ± 114</u> | <del>2,644 ± 110</del> <u>2,679 ± 114</u> | <del>92 ± 11</del> <u>96 ± 12</u>     | <del>46 ± 5</del> <u>48 ± 6 (10 ± 1)</u>     |
| PDD                          | <del>2,589 ± 107</del> <u>2,641 ± 113</u> | <del>2,644 ± 110</del> <u>2,679 ± 114</u> | <del>111 ± 11</del> <u>77 ± 6</u>     | <del>56 ± 5</del> <u>39 ± 3 (8 ± 1)</u>      |
| RACMO2.3p2                   | <del>2,352 ± 104</del> <u>2,450 ± 112</u> | <del>2,649 ± 110</del> <u>2,682 ± 115</u> | <del>81 ± 15</del> <u>86 ± 16</u>     | 5 ± 2                                        |
| T15-QuikSCAT (observations)  |                                           |                                           | <del>88 ± 26</del> <u>101 ± 24</u>    |                                              |
| SSP5-8.5 (2090–2100 mean)    |                                           |                                           |                                       |                                              |
| dEBM-simple                  | <del>3,559 ± 113</del> <u>3,477 ± 115</u> | <del>3,910 ± 111</del> <u>3,907 ± 113</u> | <del>702 ± 65</del> <u>860 ± 80</u>   | <del>351 ± 33</del> <u>430 ± 40 (86 ± 8)</u> |
| PDD                          | 3,427 ± 118                               | 3,902 ± 111                               | 950 ± 122                             | 475 ± 61 ( <u>95 ± 12</u> )                  |
| RACMO2.3p2                   | <del>3,191 ± 111</del> <u>3,189 ± 111</u> | <del>3,991 ± 113</del> <u>3,983 ± 113</u> | <del>993 ± 126</del> <u>986 ± 126</u> | <del>222 ± 27</del> <u>220 ± 27</u>          |
| T15 (GCM ensemble)           |                                           |                                           | 613 ± 258                             |                                              |

\* Note that for PISM-derived runoff values, the first value assumes a constant refreezing fraction of  $\theta = 0.5$  (representative of end-of-century climatic conditions under a SSP5-8.5 warming scenario; here used as the default), and the value in parentheses a refreeze fraction of  $\theta = 0.9$  (representative of present-day climatic conditions). More details in the text.

~~92  $\text{Gt yr}^{-1}$  and 46  $\text{Gt yr}^{-1}$~~  96  $\text{Gt yr}^{-1}$  and 48  $\text{Gt yr}^{-1}$ , respectively, at present (2005–2015 mean) to about ~~702  $\text{Gt yr}^{-1}$  and 351  $\text{Gt yr}^{-1}$~~  860  $\text{Gt yr}^{-1}$  and 430  $\text{Gt yr}^{-1}$ , respectively, by the end of the century (2090–2100 mean) (Table 2).

Compared to present day (Fig. 2a), the ice-sheet areas experiencing non-negligible surface melt in 2100 extend to higher surface elevations (up to almost ~~3,000 m, 2500 m~~, compared to about ~~2,000 m–1500 m~~ at present; see Fig. S13) and higher latitudes, with some melt on the order of several centimeters per year occurring even south of  $85^\circ \text{S}$ , marking the southernmost tip of a broad melt swath stretching the ice front and ~~eastern-western~~ margin of Ross Ice Shelf alongside the Transantarctic Mountains (Fig. 3b). In 2100, significant melt (~~>100 mm w.e.  $\text{yr}^{-1}$~~  >10 mm w.e.  $\text{yr}^{-1}$ ) is found on almost all ice shelves around the coast of Antarctica, including Filchner-Ronne Ice Shelf, all shelves along Queen Maud Land, the Amery Ice Shelf, shelves along Wilkes Land, all West Antarctic ice shelves bordering the Amundsen and Bellingshausen Seas, as well as the entirety of the Antarctic Peninsula below about ~~2,000 m–2000 m~~ surface elevation, with the only exception of some of the inner parts of Filchner and Ross ice shelves. The greatest increase in mean annual surface melt (~~>1000 mm w.e.  $\text{yr}^{-1}$~~  2000 mm w.e.  $\text{yr}^{-1}$ ) by the year 2100 is found around the northern tip and along the western coast of the Antarctic Peninsula, including Alexander Island. A larger version of Fig. 3b, showing the end-of-the-century surface melt pattern average over the years 2090 to 2100, can be found in the supplement (Fig. S14).

575 Through the melt–albedo feedback (Eq. (8)), the surface albedo decreases in the melt areas along the ice-sheet margins from its initial value (Fig. 3c). In high-intensity melt regions – mostly on the low-lying ice shelves in East Antarctica, the Amundsen Sea Embayment sector in West Antarctica, and on the Antarctic Peninsula – albedo values reduce by up to 0.10 from the maximal value  $\alpha_{\max} = 0.86$  that is used in the albedo parameterization as a start value for the simulations. Albedo values below about 0.60 (corresponding to open firm or glacier ice) occur only in some scattered and small locations at the Antarctic Peninsula north of the Antarctic Circle ( $\approx 66^\circ\text{S}$ ), which experience ~~melt rates above 1000 mm w.e. yr<sup>-1</sup>~~ high melt rates on the order of  $\mathcal{O}(1000 \text{ mm w.e. yr}^{-1})$ .

By the end of the century, the elevated surface melt shows a substantial influence on the climatic surface mass balance. While at present the annual climatic surface mass balance is positive across the entire ice sheet, meaning the surface gains more mass from snowfall than it loses by meltwater runoff, in 2100 the ablation areas, i.e., regions that experience a negative annual surface mass balance, extend along almost the entire Antarctic coastline as well as on large parts of the Amery and Ronne ice shelves, where intensifying surface melt outpaces enhanced mass gains from snowfall (Fig. 3d). Negative surface mass balance in the ice sheet’s interior can also be found in the swath of enhanced melt along the ~~eastern–western~~ margin of Ross Ice Shelf, extending to about  $85^\circ\text{S}$ . The rest of the ice sheet’s interior still exhibits net positive climatic surface mass balance rates in 2100. With respect to present day, the largest positive changes (i.e., net gain in surface mass balance) in 2100 occur at the higher elevations of the Antarctic Peninsula, Ellsworth Land (West Antarctica), and mountainous regions upstream of ~~Riiser-Larsen Ice Shelf Fimbul and Roi-Baudouin ice shelves~~ in East Antarctica (gains of more than ~~about  $1000 \text{ kg m}^{-2} \text{ yr}^{-1} \sim 700 \text{ kg m}^{-2} \text{ yr}^{-1}$~~  ; note that  $1 \text{ kg m}^{-2} = 1 \text{ mm w.e.}$ ). The largest negative changes (i.e., net reduction in surface mass balance) occur along the coasts of the Antarctic Peninsula and Enderby Land, East Antarctica (reductions of more than ~~about  $3000 \text{ kg m}^{-2} \text{ yr}^{-1} \sim 3000 \text{ kg m}^{-2} \text{ yr}^{-1}$~~ ).

595 In comparison to RACMO, the reference configuration of PISM-dEBM-simple predicts ~~nearly 30% about 13%~~ less cumulative surface melt in 2090–2100 (Table 2). This ~~deviation is largely due to discrepancy~~ may in part result as a consequence of the underestimation of locally confined high-intensity melt higher-intensity melt regimes by dEBM-simple with respect to RACMO-, which is already visible under present-day conditions in the form of increased negative biases for higher melt rates (see Figs. 1d and 2b–c), that might negatively impact melt rate estimates under the generally enhanced melt conditions in the warmer climate at the end of the century. Due to the peculiar characteristics of Antarctica’s spatial surface melt pattern of a few locally confined high-intensity melt hotspots ( $\gtrsim 1000 \text{ mm w.e. yr}^{-1}$ ) and extensive areas of only low-intensity melting with melt rates up to a few orders of magnitude lower, any under- (or over-)estimation of the melt rates in these hotspots inevitably leads to relatively large differences in the Antarctic-wide integrated estimates. Being mostly restricted to the ~~northern-most northernmost~~ parts of the Antarctic Peninsula, these areas, however, play a minor role in the overall dynamical stability of the Antarctic Ice Sheet. The lower- to medium-intensity melt regimes ( $\lesssim 1000 \text{ mm w.e. yr}^{-1}$ ), responsible for the surface melt over the vast bulk of the ice sheet, still show a reasonable fit between dEBM-simple and RACMO (Fig. S14S15; see also Sect. 5.4), suggesting that other ablation processes that are not accounted for in the dEBM approach but are included in RACMO might become more relevant under these high-intensity melt regimes. While dEBM-simple could in principle be tuned in a way to

show a better fit in the high-intensity melt regime with respect to RACMO, doing so would contravene the very nature of the  
 610 scheme, which bases on the assumption of continental-wide spatially uniform parameters.

It is perhaps interesting to point out that the dEBM-simple also shows a lower temperature sensitivity of melting as  
 compared to the PDD (see Figs. S16 and S17). In the case of the latter, which calculates melt rates solely on the basis of  
 the temperature forcing, the sensitivity of ice melt to air temperatures is given by the degree-day factor  $f_i$ , usually assumed to  
 be  $\sim 9\text{mm w.e. (PDD)}^{-1}$  (Table S1). The temperature-dependent melt of dEBM-simple (second term in Eq. (6)) on the other  
 615 hand scales with  $\sim 7\text{mm w.e. (PDD)}^{-1}$  (if expressed in the same units). Thus, once the snow cover is gone, the PDD will  
 react more sensitively to temperature changes (c.f. Bougamont et al., 2007). However, while PDD parameters are specifically  
 optimized to correctly reproduce present-day melt rates, these parameters might be not valid in significantly different climates  
 (van de Berg et al., 2011; Robinson and Goelzer, 2014).

**Relative importance of temperature-dependent melt in total surface melt.** Ratio of annual-average temperature-driven  
 620 melt and the sum of temperature- and insolation-driven melt contributions ( $\mu_{\text{temp}} = M_{\text{temp}} / (M_{\text{temp}} + M_{\text{insol}})$ ; in percent)  
 as an approximation of the relative importance of temperature-dependent melt to total melt, shown for the years 2015 (a) and  
 2100, assuming an SSP5-8.5 warming scenario (b). Areas where annual average total surface melt is zero are hatched.

### 5.3 Partitioning drivers of surface melt

The dEBM allows us to partition the relative importance of air temperatures and solar insolation as the drivers of ice sheet  
 625 surface melt (see Sect. 2.2.2). Where the total surface melt flux is positive (and hence temperatures are above the melt threshold  
 $T_{\text{min}}$ ), we can approximate the relative importance of temperature-dependent melt in the total melt flux by computing the  
 ratio of the melt contribution caused by the air temperature,  $M_{\text{temp}} \propto c_1 T_{\text{eff}}$ , and the sum of the contributions caused by air  
 temperature and incoming solar radiation:

$$\mu_{\text{temp}} := \frac{M_{\text{temp}}}{M_{\text{temp}} + M_{\text{insol}}} \quad (10)$$

630 Thereby, the insolation-driven melt contribution,  $M_{\text{insol}} \propto (1 - \alpha) \tau SW_{\Phi}$ , is given by the second-first term of Eq. (6) and  
 the sum of the contributions caused by air temperature and incoming solar radiation,  $M_{\text{insol}} \propto (1 - \alpha) \tau SW_{\Phi}$ , and represents  
 the net uptake of incoming solar shortwave radiation of the surface during the diurnal melt period. The temperature-driven melt  
 contribution,  $M_{\text{temp}} \propto c_1 T_{\text{eff}}$ , is given by the first-second term of Eq. (6)  $\mu_{\text{temp}} := M_{\text{temp}} / (M_{\text{temp}} + M_{\text{insol}})$  and represents  
 the air temperature-dependent part of the incoming longwave radiation (linear term in Eq. (5) of Krebs-Kanzow et al., 2018) as  
 635 well as turbulent sensible heat fluxes. Note that due to the (negative) melt offset  $M_{\text{off}} \propto c_2$ , which is given by the third  
 term in Eq. (6), which and represents the outgoing longwave radiation flux as well as the air temperature-independent part of  
 the incoming longwave radiation (constant term in Eq. (5) of Krebs-Kanzow et al., 2018), the radiation-driven component of  
 the dEBM would in theory only result in a positive contribution to the total melt flux, if the sum  $M_{\text{insol}} + M_{\text{off}} > 0$ . However,  
 since  $M_{\text{off}}$  is mostly constant if the surface is near the melting point (Fig. S18) and independent of changes in insolation or air  
 640 temperature and thus independent of the climate scenario, the above definition Eq. (10) constitutes a useful approximation for  
 all areas exhibiting a positive total melt flux.



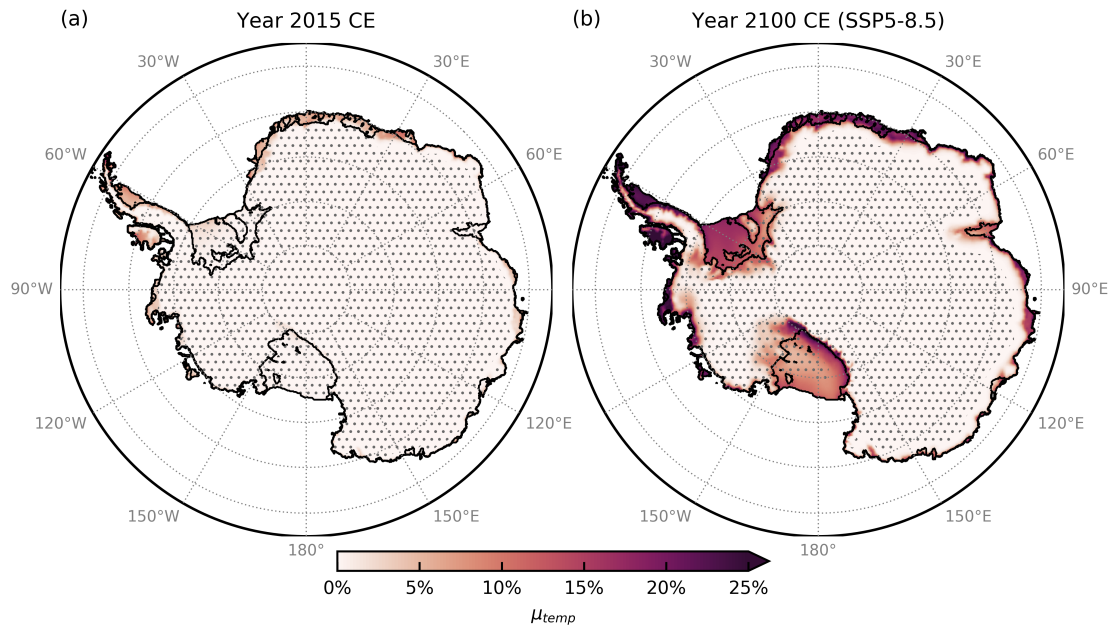

**Figure 4.** Relative importance of temperature-dependent melt in total surface melt. Ratio of annual average temperature-driven melt and the sum of temperature- and insolation-driven melt contributions  $\mu_{temp} = M_{temp} / (M_{temp} + M_{insol})$  (in percent) as an approximation of the relative importance of temperature-dependent melt to total melt, shown for the years 2015 (a) and 2100, assuming an SSP5-8.5 warming scenario (b). Areas where annual average total surface melt is zero are hatched.

The change in the relative importance of temperature- vs. insolation-driven melt,  $\mu_{temp}$ , from present day to 2100 derived from the SSP5-8.5 simulations is depicted in Fig. 4. On average, incoming solar shortwave radiation is the dominant driver of ice surface melt over the whole Antarctic Ice Sheet, both under present-day and under warmer end-of-century climate

645 conditions. At present, the annual average relative share of temperature-driven melt  $\mu_{temp}$  is comparatively small, ranging between almost zero and about ~~10%~~ 10% in the ice sheet areas that experience non-negligible surface melting, with higher values only occurring in small places at the tip of the Antarctic Peninsula north of about  $65^{\circ}\text{S}$  (Fig. 4a). By the end of the century, both the temperature-driven melt contribution  $M_{temp}$  and the insolation-driven melt contribution  $M_{insol}$  have increased substantially; ~~in~~. While the increase in  $M_{temp}$  is due to the overall increasing temperatures, the increase in  $M_{insol}$  results from

650 the overall reduction in surface albedo in areas experiencing substantial surface melt, enhanced by the melt-albedo feedback. In high-intensity melt areas with significantly lower ice albedo values, like, for example, the Larsen ~~Ice Shelf or Alexander Island or Wilkins ice shelves~~,  $M_{insol}$  increases by some ~~10 to 30%~~ 20 to 30%, while  $M_{temp}$  increases by about ~~100 to 300%~~ to 400% and above, more than an order of magnitude more. As a result, the average annual share of temperature-driven melt  $\mu_{temp}$  increases to about 15 to ~~25%~~ >25% in high-intensity melt areas along the ice sheet margins by the year 2100 (Fig. 4b).

655 Even in 2100, an average annual peak share of temperature-driven melt of more than ~~50%~~ 40% is only exceeded in small

regions around the tip of the Antarctic Peninsula, where monthly mean temperatures reach as high as a few degrees above the melting point. On the other side, over extensive areas in cold and high-altitude regions along the eastern-margin of East Antarctica, surface melting is driven almost entirely by solar insolation, provided that monthly mean air temperatures exceed the threshold temperature  $T_{\min} = -10^{\circ}\text{C}$  below which any melt is suppressed.

#### 660 5.4 Uncertainty estimation of predicted 21<sup>st</sup>-century surface melt

The model results presented in the above sections were obtained using a reference set of calibrated dEBM-simple model parameters that provide the best fit to historical and present-day melt rates from RACMO2.3p2. However, the predicted evolution of surface melt rates over this century as diagnosed by dEBM-simple is subject to uncertainties related to poorly confined model parameters. In addition to the three main dEBM-simple tuning parameters ( $c_1$ ,  $c_2$ ,  $T_{\min}$ ; see Sect. 4), the parameterizations of the surface albedo and the atmospheric transmissivity within dEBM-simple each contain two more uncertain parameters ( $a_{\alpha}$ ,  $b_{\alpha}$  and  $a_{\tau}$ ,  $b_{\tau}$ ; see Sects. 2.2.3 and 2.2.4, respectively).

To check the robustness of the predicted surface melt evolution in the SSP5-8.5 simulations with regard to uncertain model parameter choices, we run an ensemble of model simulations in which we account for deviations of those parameters from their respective default values. The model ensemble consists of 40-41 simulations sampling various combinations of different parameter values.

For the three main model tuning parameters  $c_1$ ,  $c_2$ , and the threshold temperature for melt  $T_{\min}$ , we adopt the same values that were used for the calibration (Sect. 4), which we cross-combine in the ensemble. To estimate the uncertainty from the albedo parameterization, we adopt values for the intercept  $a_{\alpha}$  (which is identical to the maximum albedo  $\alpha_{\max}$ ) and the slope  $b_{\alpha}$  that are obtained from linear regression fits of 2085 to 2100 multi-year mean monthly RACMO2.3p2 data averaged over the austral summer months December, January, and February, respectively, following the SSP5-8.5 warming scenario (Fig. S3). The values adopted for the intercept  $a_{\alpha}$  are [0.85, 0.86, 0.87, 0.88] and for the slope  $b_{\alpha}$  are [-1082.0, -740.4, -500.3] ( $\text{kg m}^{-2} \text{s}^{-1}$ )<sup>-1</sup>. Since intercept and slope of the fits are not independent of each other, we combine the two lower albedo intercepts (0.85, 0.86) only with less-steep slopes (-740.4 and -500.3 ( $\text{kg m}^{-2} \text{s}^{-1}$ )<sup>-1</sup>), the higher albedo intercept (0.87) only with steeper slopes (-1082.0 and -740.4 ( $\text{kg m}^{-2} \text{s}^{-1}$ )<sup>-1</sup>), and the highest intercept (0.88) only with the steepest slope (-1082.0 ( $\text{kg m}^{-2} \text{s}^{-1}$ )<sup>-1</sup>) (see Table 3).

In a similar fashion, we estimate the uncertainty related to the atmospheric transmissivity parameterization by varying the values of the parameters  $a_{\tau}$  and  $b_{\tau}$  on the basis of linear regression fits of 1950 to 2015 multi-year mean monthly RACMO2.3p2 data averaged over the months with the highest monthly TOA insolation December, December, and January, respectively (Fig. S2). The values adopted for the intercept  $a_{\tau}$  are [0.68, 0.70, 0.72] and for the slope  $b_{\tau}$  are [3.3, 3.6, 3.9]  $10^{-5} \text{ m}^{-1}$ . Due to limitations in computational capacity we combine the varied parameters from the albedo and transmissivity parameterizations only with the reference set of the main dEBM parameters, instead of cross-combining all possible combinations.

The maximal uncertainty spread of modeled annual total surface melt resulting from the parameter variations in the model sensitivity ensemble increases over the 21<sup>st</sup> century from about ~~170 Gt yr<sup>-1</sup>~~ 200 Gt yr<sup>-1</sup> (2015–2025 average) to about ~~420 Gt yr<sup>-1</sup>~~ 500 Gt yr<sup>-1</sup> (2090–2100 average; Fig. 5). The total uncertainty spread is thereby dominated by the uncertainty due to the

**Table 3.** Parameter value combinations of intercept  $a_\alpha$  and slope  $b_\alpha$  of the albedo parameterization of dEBM-simple used in the model sensitivity ensemble. The bold symbol marks the reference parameter combination.

| Intercept<br>$a_\alpha$ (-) | Slope $b_\alpha$ ( $[\text{kg m}^{-2} \text{s}^{-1}]^{-1}$ ) |          |        |
|-----------------------------|--------------------------------------------------------------|----------|--------|
|                             | -1082.0                                                      | -740.4   | -500.3 |
| 0.85                        |                                                              | X        | X      |
| 0.86                        |                                                              | <b>X</b> | X      |
| 0.87                        | X                                                            | X        |        |
| 0.88                        | X                                                            |          |        |

690 albedo parameterization, which increases surface melt sensitivity to incoming shortwave radiation via both lower maximal albedo values  $\alpha_{\max}$  and stronger albedo sensitivities, i.e., steeper slopes  $b_\alpha$  in the albedo parameterization (Eq. (8)). The uncertainty spreads related to the main dEBM-simple parameters and the transmissivity parameterization both are only about half of that ( $\sim 75 \text{ Gt yr}^{-1}$  and  $\sim 225 \text{ Gt yr}^{-1} \lesssim 100 \text{ Gt yr}^{-1}$  in 2015–2025 and  $\sim 250 \text{ Gt yr}^{-1}$  in 2090–2100, respectively). The upper end of the total uncertainty spread is dominated by a slightly lower maximal albedo of  $\alpha_{\max} = 0.85$  (under otherwise default model parameters) and a steeper slope of  $b_\alpha = -1082.0 (\text{kg m}^{-2} \text{s}^{-1})^{-1}$  (in combination with  $\alpha_{\max} = 0.87$  (and otherwise default model parameters) towards the end of the century. The lower end of the total uncertainty spread is dominated by the slightly higher maximal albedo values  $\alpha_{\max} = 0.87$  and  $0.88$  (even in combination with steep albedo slopes) until around the middle of the century and a combination of  $c_1 = 21.5 \text{ W m}^{-2} \text{ K}^{-1}$  and  $c_2 = -81.0 \text{ W m}^{-2}$  (i.e., a lower surface melt sensitivity to rising air temperatures) slightly higher maximal albedo values  $\alpha_{\max} = 0.87$  (in combination with the default albedo slope) as well as default maximal albedo combined with the least steep slope  $b_\alpha = -500.3 (\text{kg m}^{-2} \text{s}^{-1})^{-1}$  thereafter. Variations in the parameters from the transmissivity parameterization (Eq. (7)) result in deviations of modeled end-of-century surface melt up to about  $\pm 15\%$   $\pm 15\%$  relative to the reference simulation. The influence of variations in  $T_{\min}$  is only minor compared to that of the other parameters.

The maximal uncertainty range of modeled mean annual total surface melt of about  $530$  to  $950 \text{ Gt yr}^{-1}$   $650$  to  $1150 \text{ Gt yr}^{-1}$  projected for the decade 2090 to 2100 with PISM-dEBM-simple largely overlaps is considerably higher but overlaps in parts with the possible range of Antarctic surface melt volumes estimated in an earlier study by Trusel et al. (2015) based on a model ensemble of five selected global climate models from the CMIP5 (Coupled Model Intercomparison Project Phase 5) ensemble under RCP8.5 (about  $360$  to  $870 \text{ Gt yr}^{-1}$  for 2091–2100), while the The reference configuration of PISM-dEBM-simple predicts  $\sim 15\%$   $\sim 40\%$  more melt for that decade than the Trusel et al. (2015) model ensemble (decadal mean values are  $702$ – $860$  and  $613 \text{ Gt yr}^{-1}$ , respectively;–), while at the same time predicting about  $10\%$  less than RACMO2.3p2 despite overlapping uncertainty ranges (Fig. 5)–b). The slightly higher value of the PDD model with respect to dEBM-simple can primarily be attributed to the higher temperature sensitivity of that scheme (c.f. Bougamont et al., 2007).

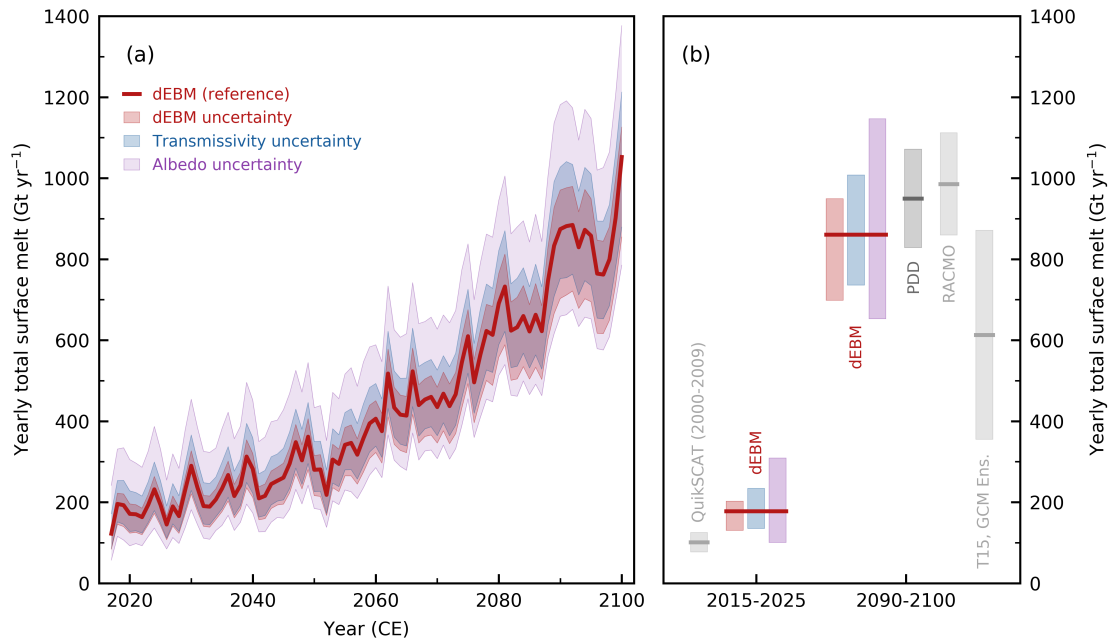

**Figure 5. Evolution of total Antarctic surface melt under SSP5-8.5 according to dEBM-simple and related model uncertainty spread.**

**(a)** Antarctic-wide integrated annual total surface melt flux (in  $\text{Gt yr}^{-1}$ ) as predicted by PISM-dEBM-simple using the reference parameter configuration under boundary forcing from RACMO2.3p2 and assuming an SSP5-8.5 warming scenario (red line). Red shading shows the model ensemble spread related to uncertainty of the three main dEBM tuning parameters ( $c_1$ ,  $c_2$ ,  $T_{\min}$ ), blue shading denotes the uncertainty spread related to the transmissivity parameterization ( $a_\tau$ ,  $b_\tau$ ), and purple shading the uncertainty spread related to the albedo parameterization ( $a_\alpha$ ,  $b_\alpha$ ). **Right panel: mean (b) Mean** annual surface melt (reference model parameters; red lines) and respective uncertainty spreads of the three contributions at indicated decades, as well as comparison to other estimates from Trusel et al. (2015) (T15; light gray); observation-based estimates for the period 2000–2009 are based on QuikSCAT data (Trusel et al., 2013). For the period 2090–2100, the dark gray bar shows the estimate from PISM using a standard PDD scheme (dark gray); and light gray bars show the respective estimates from RACMO2.3p2 as well as the RCP8.5 GCM ensemble from Trusel et al. (2015) (light gray T15). In the latter three cases, the uncertainty spread is given by the standard deviation.

## 5.5 Long-term Committed impacts of enhanced surface melting on ice-sheet dynamics

715 Due to the long response time and large inertia of the Antarctic Ice Sheet, the impact of increased surface melting on the dynamics of the ice sheet has not played out in full by the end of the simulations in 2100. Furthermore, feedback mechanisms that potentially amplify those changes – especially the surface-elevation–melt feedback – operate on longer timescales ( $\sim$ several centuries to millennia), leading to a time lag between cause and effect on the order of multiple centuries. To investigate the long-term effects committed impacts of elevated end-of-century surface melting on the ice sheet dynamics, we extend the SSP5-8.5 simulations beyond the end of the available RACMO forcing after the year 2100 under fixed end-of-century (2090–

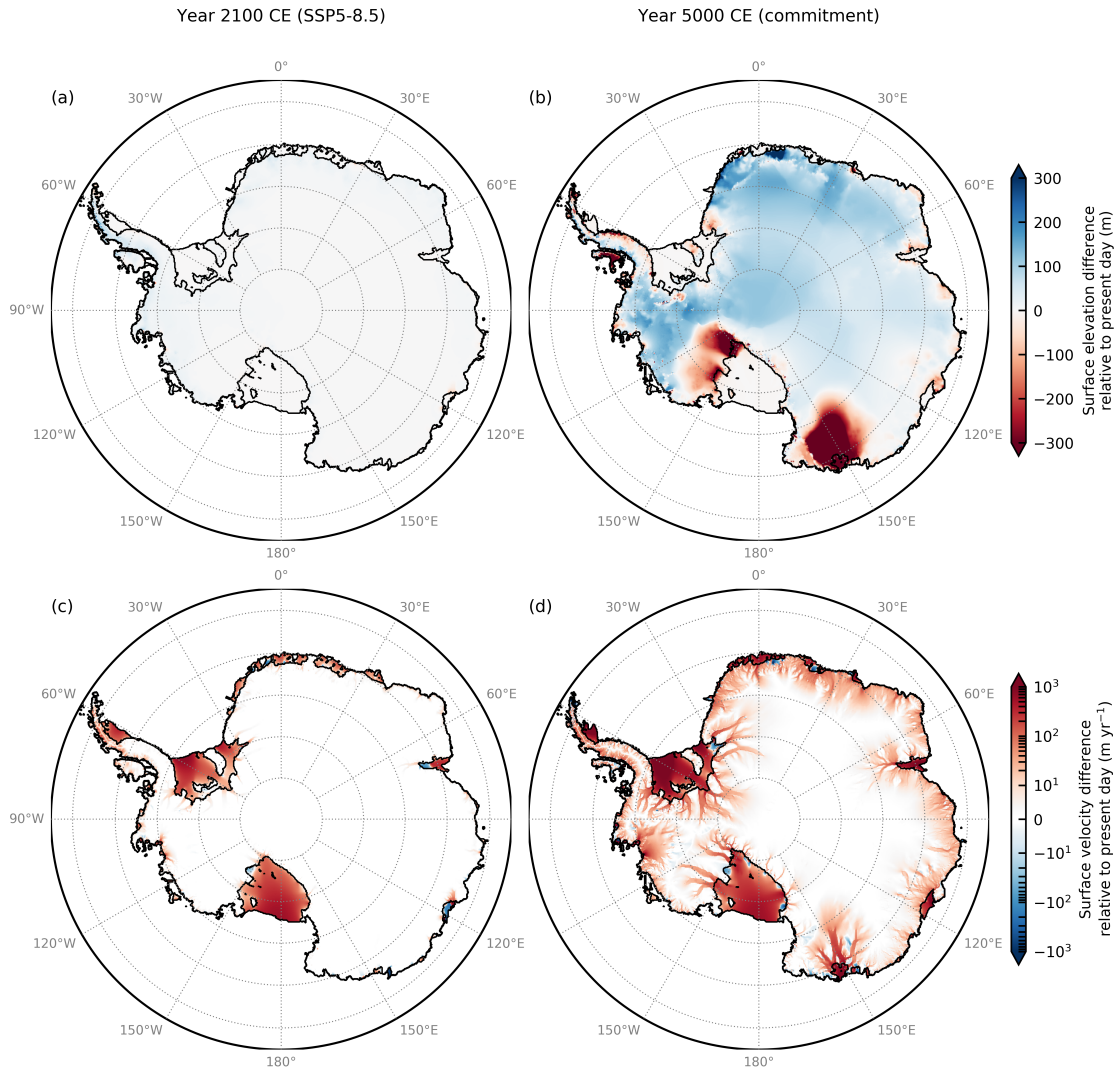

**Figure 6. Long-term dynamical changes in Antarctica resulting from enhanced surface melting. Committed dynamical changes in Antarctica resulting from enhanced surface melting.** Difference in ice-sheet surface elevation compared to present day (year 2015; in m) as modeled with PISM-dEBM-simple under SSP5-8.5 forcing from RACMO2.3p2 compared to a control simulation run under present-day (1986–2015 mean) conditions (a) in 2100 and (b) under sustained end-of-century (2090–2100 monthly mean) climate conditions in the year 3000–5000. (c–d) Same as panels (a–b), but for ice surface velocity (in  $\text{m yr}^{-1}$ ).

720 2100 monthly mean) climate conditions until the year 3000–5000 (see Sect. 3.3 for further details). By this time, the ice sheet has reached a state close to equilibrium with the atmospheric boundary conditions.

The long-term dynamical and topographical changes that the Antarctic Ice Sheet is committed to under the intensified surface melt at the end of the century even without any further warming are strong (Fig. 6). While the ice-sheet surface

elevation changes in 2100 compared to 2015 (both positive and negative) range between a few meters in the ice sheet's interior to several tens of meters in regions nearer to the coast, surface elevation changes in the year ~~3000~~ 5000 have increased by about one order of magnitude in both directions (~~Figs~~Fig. 6a–b). Regions experiencing positive elevation change (i.e., thickening) caused by enhanced snowfall are, e.g., Queen Maud Land / East Antarctica ~~and~~ Ellsworth Land / West Antarctica, ~~and Palmer Land / Antarctic Peninsula~~, whereas regions with negative elevation change (i.e., thinning) are, e.g., ~~Wilkes~~ George V Land / East Antarctica ~~and~~ Marie Byrd Land / West Antarctica, ~~and Alexander Island / Antarctic Peninsula~~. The strongest reductions in surface elevation are found ~~on~~ in catchment basins of glaciers draining George V Coast of the Wilkes Subglacial Basin / East Antarctica and on Alexander Island (up to about 1000 m of dynamic thinning), as well as on ice streams along the West Antarctic Siple and Gould coasts draining into Ross Ice Shelf (up to about ~~300 to 400 m~~ 500 to 600 m of dynamic thinning) ~~as well as the East Antarctic catchment basins of Totten Glacier (up to about 600 m) and glaciers draining George V Coast (up to about 800 m thinning).~~

~~The latter two regions~~ In particular, the Wilkes Subglacial Basin in East Antarctica ~~have~~ has recently raised increasing concern as the ice in ~~these drainage basins~~ this drainage basin rests on deep, inland-sloping bedrock submerged well below sea level, rendering ~~them~~ it susceptible to unstable and potentially irreversible marine ice-sheet collapse (Mengel and Levermann, 2014; Sun et al., 2016; Pelle et al., 2021). Long-term model simulations have shown that ~~both catchment basins are~~ this catchment basin is particularly sensitive to warmer air temperatures, while being relatively inert with respect to ocean warming alone (Golledge et al., 2017). In contrast, glaciers in the Amundsen Sea Embayment region of West Antarctica are much more sensitive to ocean forcing and show only little response to atmospheric warming alone.

Interestingly, these results are fairly robust with regard to changes in modeled meltwater runoff, i.e., the refreeze fraction parameter  $\theta$ . Assuming a value of  $\theta = 0.9$ , which is more representative of present-day cold conditions, as a kind of conservative upper bound (instead of the default value  $\theta = 0.5$ , which is more representative of warm end-of-century SSP5 conditions), the overall pattern of surface elevation and velocity changes remains similar (Fig. S19). The slightly higher overall surface mass balance in the  $\theta = 0.9$  simulation compared to the  $\theta = 0.5$  simulation generally leads to even more pronounced positive elevation changes (i.e., thickening) over most of the ice sheet, whereas the thinning in the Wilkes Subglacial Basin is even slightly stronger (Fig. S20). Given that even under  $\sim 2100$  climatic conditions the surface mass balance is largely dominated by accumulation in these regions (Fig. 3d) and ablation is low and confined to narrow bands along the coast (Fig. 3b), the negligible influence of the refreezing parameter  $\theta$  is not surprising since the thinning of these regions is primarily a consequence of internal ice dynamics rather than a negative surface mass balance. However, gradual initial surface melting due to atmospheric warming appears to act as the trigger for this unstable retreat. For Wilkes Subglacial Basin in particular, Golledge et al. (2017) have shown that surface melting may be a mechanism by which a coastal ‘ice plug’ (Mengel and Levermann, 2014) that currently prevents irreversible ice discharge from that region could be removed.

The substantial differences between the century- and millennium-scale response of the ice-sheet surface elevation, even in the absence of further warming, also point to the vital role of the surface-elevation–melt feedback: while the initial surface lowering near the coast is caused by intensified surface melt and meltwater runoff, the feedback cycle between surface altitude

and melt commits the ice to self-sustained dynamic thinning and inland retreat, independent of the climatic forcing, further amplifying dynamically-driven mass losses.

760 The changes in ice surface velocities associated with these surface elevation changes are illustrated in ~~Figs~~Fig. 6c–d :  
(and Fig. S19c–d for the  $\theta = 0.9$  simulation, respectively). Apart from a few exceptions, the vast majority of the Antarctic  
ice shelves experience a significant speed-up in ice flow in response to surface melt intensification and subsequent thinning  
already by 2100, with further acceleration by the year 3000–5000. This leads to a slight acceleration of upstream ice over most  
of the ice sheet, which propagates inland for hundreds of kilometers via the tributary glacier systems. In the year 3000–5000,  
765 accelerated ice surface flow speeds are found almost over the entire ice sheet, stretching far inland. Note that most of the  
thinning results from accelerated ice flow and discharge into the ocean, whereas the climatic surface mass balance is often still  
positive over regions with decreasing surface elevations. Importantly, the observed dynamical thinning and acceleration of the  
ice sheet happens despite an overall positive surface mass balance.

## 6 Discussion

770 ~~In this work we describe the application of the newly developed intermediate-complexity surface melt model dEBM-simple in  
an Antarctic Ice Sheet configuration. The dEBM-simple is a slightly modified version of the “simple” diurnal Energy Balance  
Model recently introduced by Krebs-Kanzow et al. (2018) that has been adopted by Zeitz et al. (2021) to serve as full-fledged  
surface mass balance module in the open-source thermo-mechanically coupled Parallel Ice Sheet Model (PISM-dEBM-simple).  
The implementation of the dEBM-simple in PISM including the adopted modifications with respect to the model formulation  
775 given in Krebs-Kanzow et al. (2018) as well as its calibration and validation for the Greenland Ice Sheet are described in more  
detail in Zeitz et al. (2021).~~

~~In the current study we calibrate the module to correctly reproduce historical and present-day Antarctic melt rate patterns  
using the state-of-the-art regional atmospheric climate model RACMO2.3p2 to then investigate the range of possible trajectories  
of Antarctic surface melt over the 21<sup>st</sup> century under an SSP5-8.5 warming scenario. In a last step, we explore the long-term  
780 impacts of sustained elevated surface melt on the Antarctic Ice Sheet’s topography and dynamics by extending the simulations  
until the year 3000 assuming fixed boundary conditions.~~

The dEBM-simple calculates ice-sheet surface melt on the basis of the surface energy balance of the daily melt period and  
simulates insolation- and temperature-driven surface melting from changes in surface albedo and seasonal as well as latitudinal  
variations of the daily insolation cycle. As such, it is more physically constrained than even simpler empirical temperature-index  
785 schemes such as the positive degree-day (PDD) method, which are still widely used in long-term ice sheet model experiments  
to compute surface melt rates in centennial- to millennial-scale continental simulations.

Furthermore, due to its high computational efficiency, dEBM-simple can be used to replace less confined temperature-index  
based surface melt schemes such as the PDD method in ice-sheet model simulations.

The dEBM-simple only takes monthly mean forcing inputs, yet implicitly accounts for the diurnal cycle of shortwave radi-  
790 ation and insolation-driven surface melt. By using efficient parameterizations for incoming TOA shortwave radiation, atmo-

spheric transmissivity, and ice surface albedo ([Zeitz et al., 2021](#)), the number of required inputs can be kept at a minimum. In addition to monthly mean surface air temperature fields, the implementation of the dEBM-simple in PISM only requires monthly mean precipitation fields as inputs in order to close the climatic surface mass balance in standalone ice-sheet model simulation runs. Thereby, precipitation is passed unaltered through the scheme, whereas the respective shares of snowfall and rain are determined based on local air temperatures.<sup>3</sup>

Overall, the dEBM-simple is capable of reproducing Antarctic historical and present-day surface melt rates with regard to spatial as well as temporal patterns considerably well, including interannual variability and trends. Without compromising on computational efficiency, the scheme performs better than the empirical PDD method in various respects under the same atmospheric climate boundary conditions. Compared to a standard PDD configuration, dEBM-simple shows smaller errors in simulated total monthly and annual surface melt volume over the historical period, a better spatial representation of present-day and end-of-century melt patterns and melt area extent over the entire ice sheet as well as over the Antarctic Peninsula in particular, and a better representation of the average yearly melt cycle.

In the following, we address some model limitations and discuss their influence on the presented findings. Being a simple model, dEBM-simple does not resolve the spatial and temporal patterns of historic and present-day surface melt over the Antarctic Ice Sheet in full detail. Nevertheless, with well-calibrated model parameters the scheme is able to reproduce historic and present-day melt rates considerably well, justifying its application for future ice-sheet projections.

In comparison to the more complex regional climate model RACMO2.3p2, the dEBM-simple in general slightly underestimates melt rates in high-intensity melt regions and during the first half of the melting season (mainly December), while slightly overestimating melt rates in low-intensity melt regions and during the months following the annual melt peak (mainly February). This bias is likely related to the use of spatially uniform and temporally invariant parameters – [first and foremost the two dEBM-parameters  \$c\_1\$  and  \$c\_2\$  which depend on the atmospheric emissivity and can not represent the spatial and temporal variability due to changing cloud cover](#) – as well as phenomenologically based linear relationships to parameterize the melt–albedo feedback and the atmospheric transmissivity.

In particular, the assumption of a first-order linear dependence of ice albedo on surface melt rates is only a rough representation of the numerous factors and processes that influence ice and snow albedo, such as snow grain size, impurities (dust/soot content, debris cover), surface water aggregation and supraglacial melt ponds, solar zenith angle, and cloud cover (Gardner and Sharp, 2010). Especially the changes in snow grain sizes, e.g., due to snow aging, are an important factor that is neglected in the model but plays a major role for the albedo. While snow aging generally leads to a reduction in albedo, and its neglect should therefore in principle lead to an underestimation of melt rates at the end of the melt season, there are important processes that act in the opposite direction: a major caveat of the scheme is that it neglects the influence of changes in snow cover thickness that could mitigate the melt-induced reduction in albedo after heavy snowfall events or inhibit the melt–albedo feedback (Picard et al., 2012; Jakobs et al., 2021). However, on the long timescales considered here individual snowfall events are likely to only play a minor role as compared to the mean surface conditions. Further, while we here focus on the long-term evolution

---

<sup>3</sup>Note that for shorter-term applications, where appropriate forcing from regional climate models is available, dEBM-simple is also capable of reading in time-dependent albedo fields as an input.



of the ice sheet and thus deliberately chose to employ the albedo parameterization, we should point out that this shortcoming  
825 could be easily resolved by reading in albedo fields from more sophisticated process-based snowpack models, provided that  
reliable data are available for the time period of interest.

Similar to the albedo approach, the parameterization of the ~~transmissivity of the atmosphere~~ atmospheric transmissivity  
bases on the assumption of time-invariant and spatially uniform parameters and thus does not account for spatial or temporal  
variability in cloud ~~cover~~ patterns or orographic effects. While the polar atmosphere over Antarctica is currently in general  
830 clean and dry and reasonably thin with only low cloud cover over the ice sheet, the assumption of constant parameters poses  
quite a strong constraint under future warmer conditions (see, e.g., Kittel et al., 2022), for which the “full” dEBM scheme  
(Krebs-Kanzow et al., 2021), which features a variable cloud cover, might be more appropriate.

Using only one set of constant model parameters that are applied uniformly over the entire model domain in time and space  
(in our case, e.g.,  $c_1$ ,  $c_2$ ,  $\sigma_{\text{PDD}}$ ,  $\Phi$ ) might further cause systematic biases in comparison to a process-based model such as  
835 RACMO by ignoring topography-dependent regional patterns and seasonal variability. As an example, the standard deviation  
of daily temperatures  $\sigma_{\text{PDD}}$  has been shown to exhibit high spatial and seasonal variability that might introduce significant  
discrepancies in surface mass balance computations (e.g., Seguinot, 2013; Rogozhina and Rau, 2014). Similarly, the value for  
the minimum solar elevation angle  $\Phi$  that is used here is adopted from Krebs-Kanzow et al. (2018) and roughly estimated  
based on typical present-day summer insolation and snow albedo values, an assumption that might not be valid in future  
840 warmer climates and that is improved in the “full” dEBM scheme (Krebs-Kanzow et al., 2021) by computing  $\Phi$  explicitly  
based on local atmospheric conditions; for a more detailed discussion and sensitivity analysis of this parameter, see Krebs-  
Kanzow et al. (2018). The dEBM-simple parameters  $c_1$  and  $T_{\text{min}}$ , governing the temperature-dependency of melt, in general  
favor more intense melt with higher absolute values, whereas  $c_2$ , related to longwave outgoing radiation, has a mitigating effect  
for higher absolute values. However, the influence of these main dEBM-simple parameters is less ~~strong~~ than that of the albedo  
845 and transmissivity parameterizations.

The spatiotemporally constant refreezing ~~factors for snow and ice used in our model ( $\theta_s$  and  $\theta_i$ , respectively), which regulate~~  
factor  $\theta$ , which regulates how much meltwater runs off the ice sheet and thus directly ~~affect~~ affects surface mass losses  
and changes in ice-sheet elevation, ~~add~~ adds another source of uncertainty that is particularly relevant ~~for~~ to the long-term  
dynamical evolution of the ice sheet as it acts as a trigger for the surface-elevation–melt feedback. As refreezing is highly  
850 variable both spatially and temporally (~~Wessem et al., 2018~~) (Wessem et al., 2018; Fig. S1), the assumption of constant ~~uniform~~  
~~values provide~~, uniform values provides only a coarse representation of ~~this effect a complex process~~ that could be further  
constrained by applying a refreezing parameterization that is either temperature-dependent or based on negative net surface  
energy ~~flux~~ fluxes, as done, for example, in Krebs-Kanzow et al. (2021) or Krapp et al. (2017). Note, however, that the wide  
range tested for this parameter (between 50 and 90 %) has only a negligible impact on the presented results, in particular, but  
855 not only, for the committed dynamical ice sheet evolution. Importantly, while even under the warmer end-of-century climate  
conditions the surface mass balance over most of the ice sheet is largely dominated by snowfall and ablation is low, enhanced  
surface melt due to atmospheric warming may act as a trigger for unstable dynamically-driven retreat in marine ice-sheet  
regions that are susceptible to instability mechanisms.

860 Being a simple mode, the dEBM-simple is unable to capture melt associated with orographic features around the edges of the ice sheet, such as foehn winds or warm katabatic winds, which can enhance melting near the grounding line (Datta et al., 2019; Lenaerts et al., 2019). To adequately capture the effects of orography–precipitation interactions, for example, fully coupled ice–atmosphere models are needed. However, smaller-scale melt characteristics or single extreme melt events are likely to be of less importance on the long timescales (i.e., glacial-cycle paleo or deep-future applications) that are the primary focus of the present approach, where the melt ‘climate’ is more important than the melt ‘weather’ (Broeke et al., 2023).

865 Finally, surface ablation contributions resulting from sublimation and evaporation are so far not considered in the present model setup. While evaporation might likely be negligible in comparison to the other ablation processes (Lenaerts et al., 2019), ~~sublimation under at present~~ (Lenaerts et al., 2019), it might become more important in future, especially under strong warming. Sublimation under high-wind and dry atmospheric conditions as found, for example, in the escarpment zones, on low-lying blue ice areas and ice shelves, or even parts of the ice-sheet interior where strong katabatic winds prevail (Lenaerts et al., 2019; Das et al., 2013), can also be a considerable factor in the surface mass balance that could be improved in future work.

## 7 Summary and conclusions

### ~~The novel ice-sheet~~

875 In this work we have applied the newly developed intermediate-complexity surface melt scheme of intermediate-complexity dEBM-simple —in an Antarctic Ice Sheet configuration to assess the possible range of future surface melt trajectories in Antarctica under a strong global warming scenario as well as their impact on ice-sheet dynamics. The dEBM-simple is a slightly modified version of the “simple” diurnal Energy Balance Model (Krebs-Kanzow et al., 2018) that has recently been implemented Krebs-Kanzow et al. (2018) that has been adopted by Zeitz et al. (2021) as a fully-fledged surface mass balance module in the Parallel Ice Sheet Model (PISM dEBM-simple) for application on the Greenland Ice Sheet—~~has been applied in an Antartetic Ice Sheet configuration to evaluate the possible range of future surface melt trajectories in Antartetica under a strong global warming scenario. The implementation of the dEBM-simple in PISM including the adopted modifications with respect to the model formulation given in Krebs-Kanzow et al. (2018) as well as their impact on long-term ice-sheet dynamics—its calibration and validation for the Greenland Ice Sheet are described in more detail in Zeitz et al. (2021).~~

885 The dEBM-simple is a fast and computationally inexpensive model and specifically developed for the use in long-term (millennial-scale) standalone prognostic ice-sheet model simulations or model ensembles in both paleo and deep-future applications. The physically based model improves upon conventional and empirically based temperature-index schemes (such as the positive degree-day, PDD) by accounting for the daily energy cycle at the ice surface on the basis of orbital configuration, latitude, and season, despite requiring only monthly inputs of 2D near-surface air temperatures as boundary forcing. Due to simple but efficient parameterizations for incoming shortwave solar radiation and ice albedo changes, it explicitly includes insolation-driven melt and is able to account for the positive melt–albedo feedback. Thus, it fills the gap between sophisticated regional climate models coupled with multi-layer snowpack models that feature physics-based process detail but come at the

890

cost of high computational expenses, and empirical temperature-index schemes that are fast enough for glacial-cycle timescales but do not account for small-scale processes at the ice–atmosphere interface, potentially neglecting important feedbacks.

In this work, we have calibrated PISM-dEBM-simple for Antarctica using a model ensemble and historical (1950–2015) atmospheric forcing from the [polar](#) regional atmospheric climate model RACMO2.3p2. We have shown that the calibrated model is able to reproduce historical Antarctic melt rates from RACMO [and satellite-derived estimates](#) in terms of interannual variability, trend, and spatial patterns considerably well, which justifies its application in future ice-sheet projections. In idealized 21<sup>st</sup>-century (2015–2100) warming simulations under a ~~RACMO-forced~~ [RACMO-CESM2-forced](#) SSP5-8.5 atmospheric warming scenario, we have used dEBM-simple in a second model ensemble to explore the range of possible future surface melt trajectories, specifically focusing on the model’s sensitivity to parameter choices. By partitioning temperature- and insolation-driven surface melt, the dEBM-simple approach is able to reveal a significant increase of the relative share of temperature-induced melting in total surface melt over the course of the century. Finally, we have investigated the ~~long-term consequences~~ [committed effects](#) of enhanced surface melting on the dynamics of the Antarctic Ice Sheet by extending the SSP5-8.5 simulations beyond 2100 under fixed end-of-century atmospheric conditions ~~–until the year 5000~~. Our findings reveal a considerable acceleration in ice flow speeds combined with a reduction in surface elevation on the order of several hundreds of meters in sensitive marine ice-sheet regions that are vulnerable to ocean-driven ice-sheet retreat, highlighting the critical role of self-accelerating ice-sheet–atmosphere feedbacks on future mass losses and sea-level contribution from the Antarctic Ice Sheet on centennial to millennial timescales.

## Appendix A: Impacts of temperature forcing treatment on PDD-derived melt

Comparing the evolution of total Antarctic surface melt as calculated with the standard PDD method in PISM during the historic period (1950–2015) to the melt rates modeled by RACMO2.3p2 reveals a systematic bias of the PDD model towards ~~higher~~ [lower](#) melt rates that is most clearly visible in the timeseries of yearly total surface melt (Fig. 1a) and in the multi-year average monthly melt cycle ~~towards the end during the first half~~ of the melting season (Fig. 1c). ~~This overestimation is mainly caused by the high temperature sensitivity of the PDD model and is amplified by our treatment of the monthly mean temperature inputs at the ice–atmosphere interface. Because the PDD model is tuned in a way that all surface melt is caused by temperatures only – which is in contrast to in situ observations showing that in the cold Antarctic climate, insolation is usually the predominant energy source for melt at the surface (Jonsell et al., 2012; King et al., 2015; Broeke et al., 2005b; Jakobs et al., 2020, 2021; cf. also Fig. 4a) – default PDD melt factors (see Table S1) likely overestimate the~~

~~These deviations are likely related to the monthly time step of the climate forcing inputs which hampers the scheme to accurately reproduce onset and end of the annual melt season. Also, the monthly averaged temperatures inputs do not capture the highest temperature peaks in summer, which are responsible for much of the cumulative melt volume. Furthermore, the spatially uniform degree-day factors of the PDD model are likely unable to resolve the wide range of spatial variability in surface melt sensitivity to temperature under significantly warmer climate regimes. While this bias might go unnoticed when using yearly average temperature inputs to drive the PDD model, our treatment of~~ [across the ice sheet and might hence](#)

925 underestimate high-intensity melt hotspots (e.g., on the northern or western Antarctic Peninsula) that have the largest overall impact on Antarctic-wide integrated melt volume. While the PDD calculates melt only from temperatures and thus misses the melt peak in January, the dEBM-simple approach can compensate for this by its inclusion of insolation-driven melting.

Our treatment of the monthly temperature inputs at the ice-atmosphere interface that are assumed piecewise-constant over every full month (see Sect. 3.2.1) leads to an on average ~~warmer-cooler start and warmer end of the~~ melting season during austral  
930 summer ~~-that in sum slightly counterbalances this underestimation.~~ In PISM's default configuration, temperature forcing is linearly interpolated in time between consecutive data points (since release v1.2; The PISM Authors, 2020), which are usually assumed to be at a yearly resolution. While this interpolation is meant to smooth out unwanted jumps in the temperature forcing when using yearly inputs, it attenuates the annual climatological cycle when using monthly data: on average, in Antarctica this approach leads to the first half of the year (January–July) being too cold and the rest of the year (August–December) being  
935 too warm, resulting in a net-negative impact on total annual melt volume, since most intense melt usually occurs in January. The approach taken here to treat all monthly input values as piecewise-constant aims to correct the aforementioned bias in the annual temperature cycle to be more consistent with RACMO's climatology. While being physically more correct with regard to the provided climate forcing data, the adjustment in general leads to slightly colder temperatures from mid-winter (~July/August) to the peak of the melting season in January, and slightly warmer temperatures thereafter, as compared to  
940 the default interpolation approach. In effect, melt rates during the first half of the melting season are commonly ~~slightly~~ underestimated by the temperature-sensitive PDD scheme and overestimated during the months following the annual melt peak, resulting in a net-positive bias of total melt volume when integrated over the full year ~~-relative to PISM's default approach (Fig. S21).~~

*Code and data availability.* The source code of PISM is publicly available on GitHub via <https://www.pism.io> (last access: 7 July 2023).  
945 A maintained version of the dEBM-simple source code is openly available at [https://github.com/mariazeitz/pism/tree/pik/dEBM\\_dev](https://github.com/mariazeitz/pism/tree/pik/dEBM_dev) (last access: 7 July 2023). The PISM-dEBM-simple code version that was used for the experiments in this study will be made publicly available through GitHub upon publication of the final paper; an archived version will be hosted on Zenodo with DOI reference. PISM input data were preprocessed using <https://github.com/pism/pism-ais> (last access: 7 July 2023) with original data citations. Yearly averaged RACMO2.3p2 variables can be downloaded from <https://zenodo.org/record/7334047> (last access: 7 July 2023). Gridded model output, initial conditions,  
950 scripts to process the forcing data, and scripts that were used to run the experiments on the high-performance computer system can be obtained from the corresponding author upon request. The Python code to perform the analysis and produce the figures can be shared upon reasonable request to the corresponding author.

*Author contributions.* R.W. and U.K.-K. conceived the idea for this work. R.W. acquired the funding. U.K.-K. developed the original dEBM. M.Z. implemented dEBM-simple in PISM, helped with the Antarctic model setup, and assisted the model evaluation. J.G. and R.W. developed  
955 the experimental design of the study. J.G. processed the forcing data, set up the model, ran the model simulations, performed the data analysis, produced the figures, and wrote the original manuscript draft. All authors provided feedback on the analysis and input to the manuscript.

*Competing interests.* The authors declare that they have no conflict of interest.

*Acknowledgements.* This research was supported by the European Union’s Horizon 2020 research and innovation programme under grant agreements no. 820575 (TiPACCs) and no. 869304 (PROTECT). We received financial support from the Leibniz Association (project Domi-  
960 noES) and the Deutsche Forschungsgemeinschaft (DFG ~~grant grants~~ [WI4556/3-1](#) and [WI4556/4-1](#)). M.Z. received funding from the German Fulbright Commission. U.K.-K. acknowledges the Helmholtz Climate Initiative REKLIM (Regional Climate Change) and the research program PoF IV “Changing Earth – Sustaining our Future” of the Alfred Wegener Institute. R.W. acknowledges funding from the PalMod project (FKZ: 01LP1925D) supported by the German Federal Ministry of Education and Research (BMBF) as a Research for Sustainability initiative (FONA). Development of PISM is supported by ~~the NSF (grants PLR-1644277 and PLR-1914668) and NASA (grants NNX17AG65G and~~  
965 [NASA grants](#) [20-CRYO2020-0052](#) ~~and~~ [80NSSC22K0274](#) and [NSF grant OAC-2118285](#). We further acknowledge the European Regional Development Fund (ERDF), the German Federal Ministry of Education and Research (BMBF) and the Land Brandenburg for supporting this project by providing resources on the high-performance computer system at the Potsdam Institute for Climate Impact Research. The authors would like to thank Melchior van Wessem for sharing the RACMO2.3p2 data and Luke Trusel for kindly providing ~~his~~ [the](#) QuikSCAT meltwater flux data. We are grateful to Ronja Reese for providing the equilibrium model state of the Antarctic Ice Sheet that was used as a  
970 basis for the simulations.

## References

- Agosta, C., Amory, C., Kittel, C., Orsi, A., Favier, V., Gallée, H., Broeke, M. R. v. d., Lenaerts, J. T. M., Wessem, J. M. v., Berg, W. J. v. d., and Fettweis, X.: Estimation of the Antarctic surface mass balance using the regional climate model MAR (1979–2015) and identification of dominant processes, *The Cryosphere*, 13, 281–296, 2019.
- 975 Albrecht, T., Winkelmann, R., and Levermann, A.: Glacial-cycle simulations of the Antarctic Ice Sheet with the Parallel Ice Sheet Model (PISM) – Part I: Boundary conditions and climatic forcing, *The Cryosphere*, 14, 599–632, 2020.
- Arthur, J. F., Stokes, C. R., Jamieson, S. S. R., Carr, J. R., Leeson, A. A., and Verjans, V.: Large interannual variability in supraglacial lakes around East Antarctica, *Nature Communications*, 13, 1711, 2022.
- Aschwanden, A., Bueler, E., Khroulev, C., and Blatter, H.: An enthalpy formulation for glaciers and ice sheets, *Journal of Glaciology*, 58, 980 441–457, 2012.
- Bassis, J. N. and Walker, C. C.: Upper and lower limits on the stability of calving glaciers from the yield strength envelope of ice, *Proceedings of the Royal Society A: Mathematical, Physical and Engineering Sciences*, 468, 913–931, 2012.
- [Bauer, E. and Ganopolski, A.: Comparison of surface mass balance of ice sheets simulated by positive-degree-day method and energy balance approach, \*Climate of the Past\*, 13, 819–832, 2017.](#)
- 985 Bell, R. E., Banwell, A. F., Trusel, L. D., and Kingslake, J.: Antarctic surface hydrology and impacts on ice-sheet mass balance, *Nature Climate Change*, 8, 1044–1052, 2018.
- [Bougamont, M., Bamber, J. L., Ridley, J. K., Gladstone, R. M., Greuell, W., Hanna, E., Payne, A. J., and Rutt, I.: Impact of model physics on estimating the surface mass balance of the Greenland ice sheet, \*Geophysical Research Letters\*, 34, 2007.](#)
- Braithwaite, R. J.: Calculation of degree-days for glacier-climate research, *Zeitschrift fuer Gletscherkunde und Glazialgeologie*, 20 (1984), 990 1–8, 1985.
- Braithwaite, R. J.: Calculation of sensible-heat flux over a melting ice surface using simple climate data and daily measurements of ablation, *Annals of Glaciology*, 50, 9–15, 2009.
- [Broeke, M. R. v. d., Munneke, P. K., Noël, B., Reijmer, C., Smeets, P., Berg, W. J. v. d., and Wessem, J. M. v.: Contrasting current and future surface melt rates on the ice sheets of Greenland and Antarctica: Lessons from in situ observations and climate models, \*PLOS Climate\*, 2, e0000203, 2023.](#)
- 995 Broeke, M. v. d.: Strong surface melting preceded collapse of Antarctic Peninsula ice shelf, *Geophysical Research Letters*, 32, L12 815, 2005a.
- Broeke, M. V. D., Reijmer, C., As, D. V., Wal, R. V. d., and Oerlemans, J.: Seasonal cycles of Antarctic surface energy balance from automatic weather stations, *Annals of Glaciology*, 41, 131–139, 2005b.
- 1000 Bromwich, D. H., Otieno, F. O., Hines, K. M., Manning, K. W., and Shilo, E.: Comprehensive evaluation of polar weather research and forecasting model performance in the Antarctic, *Journal of Geophysical Research: Atmospheres*, 118, 274–292, 2013.
- Bueler, E. and Brown, J.: Shallow shelf approximation as a “sliding law” in a thermomechanically coupled ice sheet model, *Journal of Geophysical Research*, 114, F03 008, 2009.
- Bueler, E. and van Pelt, W.: Mass-conserving subglacial hydrology in the Parallel Ice Sheet Model version 0.6, *Geoscientific Model Development*, 8, 1613–1635, 2015.
- 1005

- Busetto, M., Lanconelli, C., Mazzola, M., Lupi, A., Petkov, B., Vitale, V., Tomasi, C., Grigioni, P., and Pellegrini, A.: Parameterization of clear sky effective emissivity under surface-based temperature inversion at Dome C and South Pole, Antarctica, *Antarctic Science*, 25, 697–710, 2013.
- 1010 Calov, R. and Greve, R.: A semi-analytical solution for the positive degree-day model with stochastic temperature variations, *Journal of Glaciology*, 51, 173–175, 2005.
- Cuffey, K. M. and Paterson, W. S. B.: *The Physics of Glaciers*, Academic Press, 2010.
- Danabasoglu, G., Lamarque, J., Bacmeister, J., Bailey, D. A., DuVivier, A. K., Edwards, J., Emmons, L. K., Fasullo, J., Garcia, R., Gettelman, A., Hannay, C., Holland, M. M., Large, W. G., Lauritzen, P. H., Lawrence, D. M., Lenaerts, J. T. M., Lindsay, K., Lipscomb, W. H., Mills, M. J., Neale, R., Oleson, K. W., Otto-Bliesner, B., Phillips, A. S., Sacks, W., Tilmes, S., Kampenhout, L., Vertenstein, M., Bertini, A., 1015 Dennis, J., Deser, C., Fischer, C., Fox-Kemper, B., Kay, J. E., Kinnison, D., Kushner, P. J., Larson, V. E., Long, M. C., Mickelson, S., Moore, J. K., Nienhouse, E., Polvani, L., Rasch, P. J., and Strand, W. G.: The Community Earth System Model Version 2 (CESM2), *Journal of Advances in Modeling Earth Systems*, 12, 2020.
- Das, I., Bell, R. E., Scambos, T. A., Wolovick, M., Creyts, T. T., Studinger, M., Frearson, N., Nicolas, J. P., Lenaerts, J. T. M., and Broeke, M. R. v. d.: Influence of persistent wind scour on the surface mass balance of Antarctica, *Nature Geoscience*, 6, 367–371, 2013.
- 1020 [Datta, R. T., Tedesco, M., Fettweis, X., Agosta, C., Lhermitte, S., Lenaerts, J. T. M., and Wever, N.: The Effect of Foehn-Induced Surface Melt on Firn Evolution Over the Northeast Antarctic Peninsula, \*Geophysical Research Letters\*, 46, 3822–3831, 2019.](#)
- DeConto, R. M. and Pollard, D.: Contribution of Antarctica to past and future sea-level rise, *Nature*, 531, 591–597, 2016.
- DeConto, R. M., Pollard, D., Alley, R. B., Velicogna, I., Gasson, E., Gomez, N., Sadai, S., Condron, A., Gilford, D. M., Ashe, E. L., Kopp, R. E., Li, D., and Dutton, A.: The Paris Climate Agreement and future sea-level rise from Antarctica, *Nature*, 593, 83–89, 2021.
- 1025 Depoorter, M. A., Bamber, J. L., Griggs, J. A., Lenaerts, J. T. M., Ligtenberg, S. R. M., Broeke, M. R. v. d., and Moholdt, G.: Calving fluxes and basal melt rates of Antarctic ice shelves, *Nature*, 502, 89–92, 2013.
- Dupont, T. K. and Alley, R. B.: Assessment of the importance of ice-shelf buttressing to ice-sheet flow, *Geophysical Research Letters*, 32, L04503, 2005.
- Edwards, T. L., Nowicki, S., Marzeion, B., Hock, R., Goelzer, H., Seroussi, H., Jourdain, N. C., Slater, D. A., Turner, F. E., Smith, C. J., 1030 McKenna, C. M., Simon, E., Abe-Ouchi, A., Gregory, J. M., Larour, E., Lipscomb, W. H., Payne, A. J., Shepherd, A., Agosta, C., Alexander, P., Albrecht, T., Anderson, B., Asay-Davis, X., Aschwanden, A., Barthel, A., Bliss, A., Calov, R., Chambers, C., Champollion, N., Choi, Y., Cullather, R., Cuzzone, J., Dumas, C., Felikson, D., Fettweis, X., Fujita, K., Galton-Fenzi, B. K., Gladstone, R., Golledge, N. R., Greve, R., Hattermann, T., Hoffman, M. J., Humbert, A., Huss, M., Huybrechts, P., Immerzeel, W., Kleiner, T., Kraaijenbrink, P., clec'h, S. L., Lee, V., Leguy, G. R., Little, C. M., Lowry, D. P., Malles, J.-H., Martin, D. F., Maussion, F., Morlighem, M., O'Neill, J. F., 1035 Nias, I., Pattyn, F., Pelle, T., Price, S. F., Quiquet, A., Radić, V., Reese, R., Rounce, D. R., Rückamp, M., Sakai, A., Shafer, C., Schlegel, N.-J., Shannon, S., Smith, R. S., Straneo, F., Sun, S., Tarasov, L., Trusel, L. D., Breedam, J. V., Wal, R. v. d., Broeke, M. v. d., Winkelmann, R., Zekollari, H., Zhao, C., Zhang, T., and Zwinger, T.: Projected land ice contributions to twenty-first-century sea level rise, *Nature*, 593, 74–82, 2021.
- Favier, V., Krinner, G., Amory, C., Gallée, H., Beaumet, J., and Agosta, C.: Antarctica-Regional Climate and Surface Mass Budget, *Current Climate Change Reports*, 3, 303–315, 2017.
- 1040 Feldmann, J., Albrecht, T., Khroulev, C., Pattyn, F., and Levermann, A.: Resolution-dependent performance of grounding line motion in a shallow model compared with a full-Stokes model according to the MISIMP3d intercomparison, *The Journal of Glaciology*, 60, 353–360, 2014.

- Fettweis, X., Hofer, S., Krebs-Kanzow, U., Amory, C., Aoki, T., Berends, C. J., Born, A., Box, J. E., Delhasse, A., Fujita, K., Gierz, P.,  
1045 Goelzer, H., Hanna, E., Hashimoto, A., Huybrechts, P., Kapsch, M.-L., King, M. D., Kittel, C., Lang, C., Langen, P. L., Lenaerts, J. T. M.,  
Liston, G. E., Lohmann, G., Mernild, S. H., Mikolajewicz, U., Modali, K., Mottram, R. H., Niwano, M., Noël, B., Ryan, J. C., Smith, A.,  
Streffing, J., Tedesco, M., Berg, W. J. v. d., Broeke, M. v. d., Wal, R. S. W. v. d., Kampenhout, L. v., Wilton, D., Wouters, B., Ziemen,  
F., and Zolles, T.: GrSMBMIP: intercomparison of the modelled 1980–2012 surface mass balance over the Greenland Ice Sheet, *The  
Cryosphere*, 14, 3935–3958, 2020.
- 1050 Fox-Kemper, B., Hewitt, H., Xiao, C., Aðalgeirsdóttir, G., Drijfhout, S., Edwards, T., Golledge, N., Hemer, M., Kopp, R., Krinner, G., Mix,  
A., Notz, D., Nowicki, S., Nurhati, I., Ruiz, L., Sallée, J.-B., Slangen, A., and Yu, Y.: Ocean, Cryosphere and Sea Level Change, in: *Climate  
Change 2021: The Physical Science Basis. Contribution of Working Group I to the Sixth Assessment Report of the Intergovernmental  
Panel on Climate Change*, edited by Masson-Delmotte, V., Zhai, P., Pirani, A., Connors, S., Péan, C., Berger, S., Caud, N., Chen, Y.,  
1055 Goldfarb, L., Gomis, M., Huang, M., Leitzell, K., Lonnoy, E., Matthews, J., Maycock, T., Waterfield, T., Yelekçi, O., Yu, R., and Zhou,  
B., pp. 1211 – 1362, Cambridge University Press, Cambridge, UK and New York, NY, USA, 2021.
- Fretwell, P., Pritchard, H. D., Vaughan, D. G., Bamber, J. L., Barrand, N. E., Bell, R. E., Bianchi, C., Bingham, R. G., Blankenship, D. D.,  
Casassa, G., Catania, G., Conway, H., Cook, A. J., Corr, H. F. J., Damaske, D., Damm, V., Ferraccioli, F., Forsberg, R., Fujita, S., Gim,  
Y., Gogineni, P., Griggs, J. A., Hindmarsh, R. C. A., Holmlund, P., Holt, J. W., Jacobel, R. W., Jenkins, A., Jokat, W., Jordan, T. M., King,  
E. C., Kohler, J., Krabill, W., Riger-Kusk, M., Langley, K. A., Leitchenkov, G., Leuschen, C., Luyendyk, B. P., Matsuoka, K., Mouginot,  
1060 J., Nitsche, F. O., Nogi, Y., Nost, O. A., Popov, S. V., Rignot, E., Rippon, D. M., Rivera, A., Roberts, J., Ross, N., Siegert, M. J., Smith,  
A. M., Steinhage, D., Studinger, M., Sun, B., Tinto, B. K., Welch, B. C., Wilson, D., Young, D. A., Xiangbin, C., and Zirizzotti, A.:  
Bedmap2: improved ice bed, surface and thickness datasets for Antarctica, *The Cryosphere*, 7, 375–393, 2013.
- Frieler, K., Clark, P. U., He, F., Buizert, C., Reese, R., Ligtenberg, S. R. M., Broeke, M. R. v. d., Winkelmann, R., and Levermann, A.:  
Consistent evidence of increasing Antarctic accumulation with warming, *Nature Climate Change*, 5, 348–352, 2015.
- 1065 Fyke, J., Sergienko, O., Löfverström, M., Price, S., and Lenaerts, J. T. M.: An Overview of Interactions and Feedbacks Between Ice Sheets  
and the Earth System, *Reviews of Geophysics*, 56, 361–408, 2018.
- Fürst, J. J., Durand, G., Gillet-Chaulet, F., Tavard, L., Rankl, M., Braun, M., and Gagliardini, O.: The safety band of Antarctic ice shelves,  
*Nature Climate Change*, 6, 479–482, 2016.
- Garbe, J., Albrecht, T., Levermann, A., Donges, J. F., and Winkelmann, R.: The hysteresis of the Antarctic Ice Sheet, *Nature*, 585, 538–544,  
1070 2020.
- Gardner, A. S. and Sharp, M. J.: A review of snow and ice albedo and the development of a new physically based broadband albedo  
parameterization, *Journal of Geophysical Research: Earth Surface* (2003–2012), 115, 2010.
- Gardner, A. S., Moholdt, G., Scambos, T., Fahnestock, M., Ligtenberg, S., Broeke, M. v. d., and Nilsson, J.: Increased West Antarctic and  
unchanged East Antarctic ice discharge over the last 7 years, *The Cryosphere*, 12, 521–547, 2018.
- 1075 Gilbert, E. and Kittel, C.: Surface Melt and Runoff on Antarctic Ice Shelves at 1.5°C, 2°C, and 4°C of Future Warming, *Geophysical Research  
Letters*, 48, e2020GL091733, 2021.
- Golledge, N. R.: Long-term projections of sea-level rise from ice sheets, *WIREs Climate Change*, 11, 281–21, 2020.
- Golledge, N. R., Kowalewski, D. E., Naish, T. R., Levy, R. H., Fogwill, C. J., and Gasson, E. G. W.: The multi-millennial Antarctic commit-  
ment to future sea-level rise, *Nature*, 526, 421–425, 2015.
- 1080 Golledge, N. R., Levy, R. H., McKay, R. M., and Naish, T. R.: East Antarctic ice sheet most vulnerable to Weddell Sea warming, *Geophysical  
Research Letters*, 44, 2343–2351, 2017.



- Greene, C. A., Gardner, A. S., Schlegel, N.-J., and Fraser, A. D.: Antarctic calving loss rivals ice-shelf thinning, *Nature*, pp. 1–6, 2022.
- Gudmundsson, G. H.: Ice-shelf buttressing and the stability of marine ice sheets, *The Cryosphere*, 7, 647–655, 2013.
- Hansen, N., Simonsen, S. B., Boberg, F., Kittel, C., Orr, A., Souverijns, N., Wessem, J. M. v., and Mottram, R.: Brief communication: Impact  
1085 of common ice mask in surface mass balance estimates over the Antarctic ice sheet, *The Cryosphere*, 16, 711–718, 2022.
- Hock, R.: Temperature index melt modelling in mountain areas, *Journal of Hydrology*, 282, 104–115, 2003.
- Holland, P. R., Bracegirdle, T. J., Dutrieux, P., Jenkins, A., and Steig, E. J.: West Antarctic ice loss influenced by internal climate variability and anthropogenic forcing, *Nature Geoscience*, 12, 718–724, 2019.
- [Husman, S. d. R., Hu, Z., Wouters, B., Munneke, P. K., Veldhuijsen, S., and Lhermitte, S.: Remote Sensing of Surface Melt on Antarctica: Opportunities and Challenges, \*IEEE Journal of Selected Topics in Applied Earth Observations and Remote Sensing\*, 16, 2462–2480, 2023.](#)  
1090
- Jakobs, C. L., Reijmer, C. H., Munneke, P. K., König-Langlo, G., and Broeke, M. R. v. d.: Quantifying the snowmelt–albedo feedback at Neumayer Station, East Antarctica, *The Cryosphere*, 13, 1473–1485, 2019.
- Jakobs, C. L., Reijmer, C. H., Smeets, C. J. P. P., Trusel, L. D., Berg, W. J. v. d., Broeke, M. R. v. d., and Wessem, J. M. v.: A benchmark  
1095 dataset of in situ Antarctic surface melt rates and energy balance, *Journal of Glaciology*, 66, 291–302, 2020.
- Jakobs, C. L., Reijmer, C. H., Broeke, M. R. v. d., Berg, W. J. v. d., and Wessem, J. M. v.: Spatial Variability of the Snowmelt-Albedo Feedback in Antarctica, *Journal of Geophysical Research: Earth Surface*, 126, e2020JF005 696, 2021.
- Jenkins, A., Shoosmith, D., Dutrieux, P., Jacobs, S., Kim, T. W., Lee, S. H., Ha, H. K., and Stammerjohn, S.: West Antarctic Ice Sheet retreat in the Amundsen Sea driven by decadal oceanic variability, *Nature Geoscience*, 11, 733–738, 2018.
- 1100 Jonsell, U. Y., Navarro, F. J., Bañón, M., Lapazaran, J. J., and Otero, J.: Sensitivity of a distributed temperature-radiation index melt model based on AWS observations and surface energy balance fluxes, Hurd Peninsula glaciers, Livingston Island, Antarctica, *The Cryosphere*, 6, 539–552, 2012.
- King, J. C., Gadian, A., Kirchgaessner, A., Munneke, P. K., Lachlan-Cope, T. A., Orr, A., Reijmer, C., Broeke, M. R. v. d., Wessem, J. M. v., and Weeks, M.: Validation of the summertime surface energy budget of Larsen C Ice Shelf (Antarctica) as represented in three  
1105 high-resolution atmospheric models, *Journal of Geophysical Research: Atmospheres*, 120, 1335–1347, 2015.
- Kingslake, J., Ely, J. C., Das, I., and Bell, R. E.: Widespread movement of meltwater onto and across Antarctic ice shelves, *Nature*, 544, 349–352, 2017.
- Kittel, C., Amory, C., Agosta, C., Jourdain, N. C., Hofer, S., Delhasse, A., Doutreloup, S., Huot, P.-V., Lang, C., Fichet, T., and Fettweis, X.: Diverging future surface mass balance between the Antarctic ice shelves and grounded ice sheet, *The Cryosphere*, 15, 1215–1236,  
1110 2021.
- Kittel, C., Amory, C., Hofer, S., Agosta, C., Jourdain, N. C., Gilbert, E., Toumelin, L. L., Vignon, E., Gallée, H., and Fettweis, X.: Clouds drive differences in future surface melt over the Antarctic ice shelves, *The Cryosphere*, 16, 2655–2669, 2022.
- Krapp, M., Robinson, A., and Ganopolski, A.: SEMIC: an efficient surface energy and mass balance model applied to the Greenland ice sheet, *The Cryosphere*, 11, 1519–1535, 2017.
- 1115 Krebs-Kanzow, U., Gierz, P., and Lohmann, G.: Brief communication: An ice surface melt scheme including the diurnal cycle of solar radiation, *The Cryosphere*, 12, 3923–3930, 2018.
- Krebs-Kanzow, U., Gierz, P., Rodehacke, C. B., Xu, S., Yang, H., and Lohmann, G.: The diurnal Energy Balance Model (dEBM): a convenient surface mass balance solution for ice sheets in Earth system modeling, *The Cryosphere*, 15, 2295–2313, 2021.

- Lai, C.-Y., Kingslake, J., Wearing, M. G., Chen, P.-H. C., Gentine, P., Li, H., Spergel, J. J., and Wessem, J. M. v.: Vulnerability of Antarctica's ice shelves to meltwater-driven fracture, *Nature*, 584, 574–578, 2020.
- [Lenaerts, J. T. M., Lhermitte, S., Drews, R., Ligtenberg, S. R. M., Berger, S., Helm, V., Smeets, C. J. P. P., Broeke, M. R. v. d., Berg, W. J. v. d., Meijgaard, E. v., Eijkelboom, M., Eisen, O., and Pattyn, F.: Meltwater produced by wind–albedo interaction stored in an East Antarctic ice shelf, \*Nature Climate Change\*, 7, 58–62, 2017.](#)
- Lenaerts, J. T. M., Ligtenberg, S. R. M., Medley, B., Berg, W. J. V. d., Konrad, H., Nicolas, J. P., Wessem, J. M. V., Trusel, L. D., Mulvaney, R., Tuckwell, R. J., Hogg, A. E., and Thomas, E. R.: Climate and surface mass balance of coastal West Antarctica resolved by regional climate modelling, *Annals of Glaciology*, 59, 29–41, 2018.
- Lenaerts, J. T. M., Medley, B., Broeke, M. R. v. d., and Wouters, B.: Observing and Modeling Ice Sheet Surface Mass Balance, *Reviews of Geophysics*, 57, 376–420, 2019.
- Levermann, A. and Winkelmann, R.: A simple equation for the melt elevation feedback of ice sheets, *The Cryosphere*, 10, 1799–1807, 2016.
- Levermann, A., Albrecht, T., Winkelmann, R., Martin, M. A., Haseloff, M., and Joughin, I.: Kinematic first-order calving law implies potential for abrupt ice-shelf retreat, *The Cryosphere*, 6, 273–286, 2012.
- Lliboutry, L. and Duval, P.: Various isotropic and anisotropic ices found in glaciers and polar ice caps and their corresponding rheologies, *Annales geophysicae*, 3, 207–224, 1985.
- Locarnini, R., Mishonov, A., Baranova, O., Boyer, T., Zweng, M., Garcia, H., Reagan, J., Seidov, D., Weathers, K., Paver, C., and Smolyar, I.: World Ocean Atlas 2018, Volume 1: Temperature, NOAA National Centers for Environmental Information, 2019.
- Martin, M. A., Winkelmann, R., Haseloff, M., Albrecht, T., Bueller, E., Khroulev, C., and Levermann, A.: The Potsdam Parallel Ice Sheet Model (PISM-PIK) – Part 2: Dynamic equilibrium simulation of the Antarctic ice sheet, *The Cryosphere*, 5, 727–740, 2011.
- Medley, B. and Thomas, E. R.: Increased snowfall over the Antarctic Ice Sheet mitigated twentieth-century sea-level rise, *Nature Climate Change*, 9, 34–39, 2018.
- Mengel, M. and Levermann, A.: Ice plug prevents irreversible discharge from East Antarctica, *Nature Climate Change*, 4, 451–455, 2014.
- Meredith, M., Sommerkorn, M., Cassotta, S., Derksen, C., Ekaykin, A., Hollowed, A., Kofinas, G., Mackintosh, A., Melbourne-Thomas, J., Muelbert, M., Ottersen, G., Pritchard, H., and Schuur, E.: Polar Regions, in: IPCC Special Report on the Ocean and Cryosphere in a Changing Climate, edited by Pörtner, H.-O., Roberts, D., Masson-Delmotte, V., Zhai, P., Tignor, M., Poloczanska, E., Mintenbeck, K., Alegría, A., Nicolai, M., Okem, A., Petzold, J., Rama, B., and Weyer, N., pp. 203 – 320, Cambridge University Press, Cambridge, UK and New York, NY, USA, 2019.
- Morlighem, M., Rignot, E., Binder, T., Blankenship, D., Drews, R., Eagles, G., Eisen, O., Ferraccioli, F., Forsberg, R., Fretwell, P., Goel, V., Greenbaum, J. S., Gudmundsson, H., Guo, J., Helm, V., Hofstede, C., Howat, I., Humbert, A., Jokat, W., Karlsson, N. B., Lee, W. S., Matsuoka, K., Millan, R., Mouginit, J., Paden, J., Pattyn, F., Roberts, J., Rosier, S., Ruppel, A., Seroussi, H., Smith, E. C., Steinhage, D., Sun, B., Broeke, M. R. v. d., Ommen, T. D. v., Wessem, M. v., and Young, D. A.: Deep glacial troughs and stabilizing ridges unveiled beneath the margins of the Antarctic ice sheet, *Nature Geoscience*, 13, 132–137, 2019.
- Mottram, R., Hansen, N., Kittel, C., Wessem, J. M. v., Agosta, C., Amory, C., Boberg, F., Berg, W. J. v. d., Fettweis, X., Gossart, A., Lipzig, N. P. M. v., Meijgaard, E. v., Orr, A., Phillips, T., Webster, S., Simonsen, S. B., and Souverijns, N.: What is the surface mass balance of Antarctica? An intercomparison of regional climate model estimates, *The Cryosphere*, 15, 3751–3784, 2021.
- Munneke, P. K., Picard, G., Broeke, M. R. d., Lenaerts, J. T. M., and Meijgaard, E.: Insignificant change in Antarctic snowmelt volume since 1979, *Geophysical Research Letters*, 39, L01 501, 2012.

- Noble, T. L., Rohling, E. J., Aitken, A. R. A., Bostock, H. C., Chase, Z., Gomez, N., Jong, L. M., King, M. A., Mackintosh, A. N., McCormack, F. S., McKay, R. M., Menviel, L., Phipps, S. J., Weber, M. E., Fogwill, C. J., Gayen, B., Golledge, N. R., Gwyther, D. E., Hogg, A. M., Martos, Y. M., Pena-Molino, B., Roberts, J., Flierdt, T., and Williams, T.: The Sensitivity of the Antarctic Ice Sheet to a Changing Climate: Past, Present, and Future, *Reviews of Geophysics*, 58, 91 – 89, 2020.
- 1160 Olbers, D. J. and Hellmer, H. H.: A box model of circulation and melting in ice shelf caverns, *Ocean Dynamics*, 60, 141–153, 2010.
- [Orr, A., Deb, P., Clem, K. R., Gilbert, E., Bromwich, D. H., Boberg, F., Colwell, S., Hansen, N., Lazzara, M. A., Mooney, P. A., Mottram, R., Niwano, M., Phillips, T., Pishniak, D., Reijmer, C. H., Berg, W. J. v. d., Webster, S., and Zou, X.: Characteristics of Surface “Melt Potential” over Antarctic Ice Shelves based on Regional Atmospheric Model Simulations of Summer Air Temperature Extremes from 1979/80 to 2018/19, \*Journal of Climate\*, 36, 3357–3383, 2023.](#)
- 1165 Palermé, C., Genthon, C., Claud, C., Kay, J. E., Wood, N. B., and L’Ecuyer, T.: Evaluation of current and projected Antarctic precipitation in CMIP5 models, *Climate Dynamics*, 48, 225–239, 2017.
- Paolo, F. S., Fricker, H. A., and Padman, L.: Volume loss from Antarctic ice shelves is accelerating, *Science*, 348, 327–331, 2015.
- Pattyn, F. and Morlighem, M.: The uncertain future of the Antarctic Ice Sheet, *Science*, 367, 1331–1335, 2020.
- Pelle, T., Morlighem, M., Nakayama, Y., and Seroussi, H.: Widespread Grounding Line Retreat of Totten Glacier, East Antarctica, Over the  
1170 21st Century, *Geophysical Research Letters*, 48, 2021.
- Picard, G., Domine, F., Krinner, G., Arnaud, L., and Lefebvre, E.: Inhibition of the positive snow-albedo feedback by precipitation in interior Antarctica, *Nature Climate Change*, 2, 795–798, 2012.
- Pollard, D., DeConto, R. M., and Alley, R. B.: Potential Antarctic Ice Sheet retreat driven by hydrofracturing and ice cliff failure, *Earth and Planetary Science Letters*, 412, 112–121, 2015.
- 1175 Pritchard, H. D., Ligtenberg, S. R. M., Fricker, H. A., Vaughan, D. G., Broeke, M. R. v. d., and Padman, L.: Antarctic ice-sheet loss driven by basal melting of ice shelves, *Nature*, 484, 502–505, 2012.
- Reeh, N.: Parameterization of Melt Rate and Surface Temperature in the Greenland Ice Sheet, *Polarforschung*, 59, 113–128, 1991.
- Reese, R., Albrecht, T., Mengel, M., Asay-Davis, X. S., and Winkelmann, R.: Antarctic sub-shelf melt rates via PICO, *The Cryosphere*, 12, 1969–1985, 2018.
- 1180 Reese, R., Levermann, A., Albrecht, T., Seroussi, H., and Winkelmann, R.: The role of history and strength of the oceanic forcing in sea level projections from Antarctica with the Parallel Ice Sheet Model, *The Cryosphere*, 14, 3097–3110, 2020.
- Riahi, K., Vuuren, D. P. v., Kriegler, E., Edmonds, J., O’Neill, B. C., Fujimori, S., Bauer, N., Calvin, K., Dellink, R., Fricko, O., Lutz, W., Popp, A., Cuaresma, J. C., KC, S., Leimbach, M., Jiang, L., Kram, T., Rao, S., Emmerling, J., Ebi, K., Hasegawa, T., Havlik, P., Humpenöder, F., Silva, L. A. D., Smith, S., Stehfest, E., Bosetti, V., Eom, J., Gernaat, D., Masui, T., Rogelj, J., Strefler, J., Drouet,  
1185 L., Krey, V., Luderer, G., Harmsen, M., Takahashi, K., Baumstark, L., Doelman, J. C., Kainuma, M., Klimont, Z., Marangoni, G., Lotze-Campen, H., Obersteiner, M., Tabeau, A., and Tavoni, M.: The Shared Socioeconomic Pathways and their energy, land use, and greenhouse gas emissions implications: An overview, *Global Environmental Change*, 42, 153–168, 2017.
- Rignot, E., Casassa, G., Gogineni, P., Krabill, W., Rivera, A., and Thomas, R.: Accelerated ice discharge from the Antarctic Peninsula following the collapse of Larsen B ice shelf, *Geophysical Research Letters*, 31, 2004.
- 1190 Rignot, E., Mouginot, J., and Scheuchl, B.: Ice Flow of the Antarctic Ice Sheet, *Science*, 333, 1427–1430, 2011.
- Rignot, E., Jacobs, S., Mouginot, J., and Scheuchl, B.: Ice-Shelf Melting Around Antarctica, *Science*, 341, 266–270, 2013.
- Rignot, E., Mouginot, J., Scheuchl, B., Broeke, M. v. d., Wessem, M. J. v., and Morlighem, M.: Four decades of Antarctic Ice Sheet mass balance from 1979–2017, *Proceedings of the National Academy of Sciences of the United States of America*, 116, 1095–1103, 2019.

- 1195 Robinson, A., Calov, R., and Ganopolski, A.: Multistability and critical thresholds of the Greenland ice sheet, *Nature Climate Change*, 2, 429–432, 2012.
- Rogozhina, I. and Rau, D.: Vital role of daily temperature variability in surface mass balance parameterizations of the Greenland Ice Sheet, *The Cryosphere*, 8, 575–585, 2014.
- Rott, H., Müller, F., Nagler, T., and Floricioiu, D.: The imbalance of glaciers after disintegration of Larsen-B ice shelf, Antarctic Peninsula, *The Cryosphere*, 5, 125–134, 2011.
- 1200 Scambos, T. A., Hulbe, C., Fahnestock, M., and Bohlander, J.: The link between climate warming and break-up of ice shelves in the Antarctic Peninsula, *Journal of Glaciology*, 46, 516–530, 2000.
- Scambos, T. A., Bohlander, J. A., Shuman, C. A., and Skvarca, P.: Glacier acceleration and thinning after ice shelf collapse in the Larsen B embayment, *Antarctica, Geophysical Research Letters*, 31, 2004.
- 1205 Schmidtko, S., Heywood, K. J., Thompson, A. F., and Aoki, S.: Multidecadal warming of Antarctic waters, *Science*, 346, 1227–1231, 2014.
- Schoof, C.: A variational approach to ice stream flow, *Journal of Fluid Mechanics*, 556, 227–251, 2006.
- Schoof, C.: Ice sheet grounding line dynamics: Steady states, stability, and hysteresis, *Journal of Geophysical Research*, 112, 2007.
- Schoof, C. G. and Hindmarsh, R. C. A.: Thin-Film Flows with Wall Slip: An Asymptotic Analysis of Higher Order Glacier Flow Models, *The Quarterly Journal of Mechanics and Applied Mathematics*, 63, 73–114, 2010.
- 1210 Schwalm, C. R., Glendon, S., and Duffy, P. B.: RCP8.5 tracks cumulative CO<sub>2</sub> emissions, *Proceedings of the National Academy of Sciences of the United States of America*, 117, 19 656–19 657, 2020.
- Seguinot, J.: Spatial and seasonal effects of temperature variability in a positive degree-day glacier surface mass-balance model, *Journal of Glaciology*, 59, 1202–1204, 2013.
- Seroussi, H., Nowicki, S. M. J., Payne, A. J., Goelzer, H., Lipscomb, W. H., Abe-Ouchi, A., Agosta, C., Albrecht, T., Asay-Davis, X. S., 1215 Barthel, A., Calov, R., Cullather, R., Dumas, C., Galton-Fenzi, B. K., Gladstone, R., Golledge, N. R., Gregory, J. M., Greve, R., Hattermann, T., Hoffman, M. J., Humbert, A., Huybrechts, P., Jourdain, N. C., Kleiner, T., Larour, E., Leguy, G. R., Lowry, D. P., Little, C. M., Morlighem, M., Pattyn, F., Pelle, T., Price, S. F., Quiquet, A., Reese, R., Schlegel, N.-J., Shepherd, A. P., Simon, E. G., Smith, R. S., Straneo, F., Sun, S., Trusel, L. D., Van Breedam, J., van de Wal, R. S. W., Winkelmann, R., Zhao, C., Zhang, T., and Zwinger, T.: ISMIP6 Antarctica: a multi-model ensemble of the Antarctic ice sheet evolution over the 21st century, *The Cryosphere*, 14, 3033–3070, 2020.
- 1220 Shepherd, A., Ivins, E. R., A, G., Barletta, V. R., Bentley, M. J., Bettadpur, S., Briggs, K. H., Bromwich, D. H., Forsberg, R., Galin, N., Horwath, M., Jacobs, S., Joughin, I., King, M. A., Lenaerts, J. T. M., Li, J., Ligtenberg, S. R. M., Luckman, A., Luthcke, S. B., McMillan, M., Meister, R., Milne, G., Mouginot, J., Muir, A., Nicolas, J. P., Paden, J., Payne, A. J., Pritchard, H., Rignot, E., Rott, H., Sørensen, L. S., Scambos, T. A., Scheuchl, B., Schrama, E. J. O., Smith, B., Sundal, A. V., Angelen, J. H. v., Berg, W. J. v. d., Broeke, M. R. v. d., Vaughan, D. G., Velicogna, I., Wahr, J., Whitehouse, P. L., Wingham, D. J., Yi, D., Young, D., and Zwally, H. J.: A Reconciled Estimate 1225 of Ice-Sheet Mass Balance, *Science*, 338, 1183–1189, 2012.
- Slater, T. and Shepherd, A.: Antarctic ice losses tracking high, *Nature Climate Change*, 8, 1025–1026, 2018.
- Slater, T., Hogg, A. E., and Mottram, R.: Ice-sheet losses track high-end sea-level rise projections, *Nature Climate Change*, 10, 879–881, 2020.
- Souvereinjs, N., Gossart, A., Demuzere, M., Lenaerts, J. T. M., Medley, B., Gorodetskaya, I. V., Broucke, S. V., and Lipzig, N. P. M.: A 1230 New Regional Climate Model for POLAR-CORDEX: Evaluation of a 30-Year Hindcast with COSMO-CLM2 Over Antarctica, *Journal of Geophysical Research: Atmospheres*, 124, 1405–1427, 2019.

- Stokes, C. R., Sanderson, J. E., Miles, B. W. J., Jamieson, S. S. R., and Leeson, A. A.: Widespread distribution of supraglacial lakes around the margin of the East Antarctic Ice Sheet, *Scientific Reports*, 9, 13 823, 2019.
- 1235 Stokes, C. R., Abram, N. J., Bentley, M. J., Edwards, T. L., England, M. H., Foppert, A., Jamieson, S. S. R., Jones, R. S., King, M. A., Lenaerts, J. T. M., Medley, B., Miles, B. W. J., Paxman, G. J. G., Ritz, C., Flierdt, T. v. d., and Whitehouse, P. L.: Response of the East Antarctic Ice Sheet to past and future climate change, *Nature*, 608, 275–286, 2022.
- Sun, S., Cornford, S. L., Gwyther, D. E., Gladstone, R. M., Galton-Fenzi, B. K., Zhao, L., and Moore, J. C.: Impact of ocean forcing on the Aurora Basin in the 21st and 22nd centuries, *Annals of Glaciology*, 57, 79–86, 2016.
- 1240 Sun, S., Pattyn, F., Simon, E. G., Albrecht, T., Cornford, S., Calov, R., Dumas, C., Gillet-Chaulet, F., Goelzer, H., Golledge, N. R., Greve, R., Hoffman, M. J., Humbert, A., Kazmierczak, E., Kleiner, T., Leguy, G. R., Lipscomb, W. H., Martin, D., Morlighem, M., Nowicki, S., Pollard, D., Price, S., Quiquet, A., Seroussi, H., Schlemm, T., Sutter, J., Wal, R. S. W. v. d., Winkelmann, R., and Zhang, T.: Antarctic ice sheet response to sudden and sustained ice-shelf collapse (ABUMIP), *Journal of Glaciology*, 66, 891–904, 2020.
- Tedesco, M. and Monaghan, A. J.: An updated Antarctic melt record through 2009 and its linkages to high-latitude and tropical climate variability, *Geophysical Research Letters*, 36, 2009.
- 1245 The IMBIE Team: Mass balance of the Antarctic Ice Sheet from 1992 to 2017, *Nature*, 558, 219–222, 2018.
- The PISM Authors: PISM, a Parallel Ice Sheet Model: User’s Manual (version 1.2), <https://github.com/pism/pism/tree/v1.2>, 2020.
- Trusel, L. D., Frey, K. E., Das, S. B., Munneke, P. K., and Broeke, M. R.: Satellite-based estimates of Antarctic surface meltwater fluxes, *Geophysical Research Letters*, 40, 6148–6153, 2013.
- 1250 Trusel, L. D., Frey, K. E., Das, S. B., Karnauskas, K. B., Munneke, P. K., Meijgaard, E. v., and Broeke, M. R. v. d.: Divergent trajectories of Antarctic surface melt under two twenty-first-century climate scenarios, *Nature Geoscience*, 8, 927–932, 2015.
- Tulaczyk, S., Kamb, W. B., and Engelhardt, H. F.: Basal mechanics of Ice Stream B, west Antarctica: 1. Till mechanics, *Journal of Geophysical Research: Solid Earth*, 105, 463–481, 2000.
- [van de Berg, W. J., van den Broeke, M., Ettema, J., van Meijgaard, E., and Kaspar, F.: Significant contribution of insolation to Eemian melting of the Greenland ice sheet, \*Nature Geoscience\*, 4, 679–683, 2011.](#)
- 1255 Weertman, J.: Stability of ice-age ice sheets, *Journal of Geophysical Research*, 66, 3783–3792, 1961.
- Weertman, J.: Stability of the Junction of an Ice Sheet and an Ice Shelf, *Journal of Glaciology*, 13, 3–11, 1974.
- Wessem, J. M. v., Berg, W. J. v. d., Noël, B. P. Y., Meijgaard, E. v., Amory, C., Birnbaum, G., Jakobs, C. L., Krüger, K., Lenaerts, J. T. M., Lhermitte, S., Ligtenberg, S. R. M., Medley, B., Reijmer, C. H., Tricht, K. v., Trusel, L. D., Ulf, L. H. v., Wouters, B., Wuite, J., and Broeke, M. R. v. d.: Modelling the climate and surface mass balance of polar ice sheets using RACMO2 – Part 2: Antarctica (1979–2016), *The Cryosphere*, 12, 1479–1498, 2018.
- 1260 Winkelmann, R., Martin, M. A., Haseloff, M., Albrecht, T., Bueler, E., Khroulev, C., and Levermann, A.: The Potsdam Parallel Ice Sheet Model (PISM-PIK) – Part 1: Model description, *The Cryosphere*, 5, 715–726, 2011.
- Zeitz, M., Reese, R., Beckmann, J., Krebs-Kanzow, U., and Winkelmann, R.: Impact of the melt–albedo feedback on the future evolution of the Greenland Ice Sheet with PISM-dEBM-simple, *The Cryosphere*, 15, 5739–5764, 2021.
- 1265 Zweng, M., Reagan, J., Seidov, D., Boyer, T., Locarnini, R., Garcia, H., Mishonov, A., Baranova, O., Paver, C., and Smolyar, I.: World Ocean Atlas 2018, Volume 2: Salinity, NOAA National Centers for Environmental Information, 2019.

*Supplement of*  
**“The evolution of future Antarctic surface melt using  
PISM-dEBM-simple”**

Julius Garbe<sup>1,2</sup>, Maria Zeitz<sup>1,2</sup>, Uta Krebs-Kanzow<sup>3</sup>, and Ricarda Winkelmann<sup>1,2</sup>

<sup>1</sup>Potsdam Institute for Climate Impact Research (PIK), Member of the Leibniz Association, P.O. Box 60 12 03, 14412 Potsdam, Germany

<sup>2</sup>University of Potsdam, Institute of Physics and Astronomy, Karl-Liebknecht-Str. 24-25, 14476 Potsdam, Germany

<sup>3</sup>Alfred Wegener Institute Helmholtz Centre for Polar and Marine Research, Bremerhaven, Germany

**Correspondence:** Julius Garbe (julius.garbe@pik-potsdam.de)

This supplement contains 1 supplementary table and 21 supplementary figures.

## List of supplementary tables

|    |                                                  |   |
|----|--------------------------------------------------|---|
| S1 | List of model parameters and constants . . . . . | 3 |
|----|--------------------------------------------------|---|

## List of supplementary figures

|    |     |                                                                                                   |    |
|----|-----|---------------------------------------------------------------------------------------------------|----|
| 5  | S1  | Refreeze fraction $\theta$ . . . . .                                                              | 4  |
|    | S2  | Atmospheric transmissivity parameterization . . . . .                                             | 5  |
|    | S3  | Surface albedo parameterization . . . . .                                                         | 6  |
|    | S4  | Comparison between RACMO and satellite-derived surface melt estimates (2000–2009) . . . . .       | 7  |
|    | S5  | Wind speeds . . . . .                                                                             | 8  |
| 10 | S6  | Threshold temperature for melt $T_{\min}$ . . . . .                                               | 9  |
|    | S7  | Annual surface melt in the historical model calibration ensemble . . . . .                        | 10 |
|    | S8  | Performance summary of the historical model calibration ensemble . . . . .                        | 11 |
|    | S9  | Comparison between dEBM-simple and RACMO-computed surface melt estimates (1950–2015) . . . . .    | 12 |
|    | S10 | Present-day surface melt rates computed with PISM using PDD . . . . .                             | 13 |
| 15 | S11 | Comparison between PDD and RACMO-computed surface melt estimates (1950–2015) . . . . .            | 14 |
|    | S12 | Comparison between dEBM-simple and satellite-derived surface melt estimates (2000–2009) . . . . . | 15 |
|    | S13 | Surface melt rates vs. ice-sheet surface altitude . . . . .                                       | 16 |
|    | S14 | End-of-century surface melt rates computed by dEBM-simple . . . . .                               | 17 |
|    | S15 | Comparison between dEBM-simple and RACMO-computed surface melt estimates (2090–2100) . . . . .    | 18 |
| 20 | S16 | End-of-century surface melt rates computed with PISM using PDD . . . . .                          | 19 |
|    | S17 | Comparison between PDD and RACMO-computed surface melt estimates (2090–2100) . . . . .            | 20 |
|    | S18 | Melt offset $M_{\text{off}}$ . . . . .                                                            | 21 |
|    | S19 | Committed dynamical changes from enhanced surface melting ( $\theta = 0.9$ ) . . . . .            | 22 |
|    | S20 | Uncertainty of committed dynamical changes from enhanced surface melting . . . . .                | 23 |
| 25 | S21 | Impact of temperature forcing treatment on PDD melt . . . . .                                     | 24 |

**Table S1.** List of ice-sheet model constants and parameters used in PISM and their default values adopted for this study.

| Symbol               | Parameter                                                         | Value             | Unit                           |
|----------------------|-------------------------------------------------------------------|-------------------|--------------------------------|
| $\Delta x, \Delta y$ | Horizontal grid resolution                                        | 8                 | km                             |
| $\Delta z$           | Vertical grid resolution                                          | 13 – 87           | m                              |
| $n$                  | Glen flow law exponent                                            | 3                 | –                              |
| $E_{SIA}$            | Enhancement factor for SIA                                        | 1                 | –                              |
| $E_{SSA}$            | Enhancement factor for SSA                                        | 1                 | –                              |
| $u_0$                | Sliding law threshold velocity (Eq. (1))                          | 100               | $\text{m yr}^{-1}$             |
| $q$                  | Pseudo-plastic sliding exponent (Eq. (1))                         | 0.75              | –                              |
| $c_0$                | Apparent till cohesion (Eq. (2))                                  | 0                 | Pa                             |
| $\phi_{\min}$        | Minimal till friction angle (Eq. (3))                             | 2                 | $^\circ$                       |
| $\phi_{\max}$        | Maximal till friction angle (Eq. (3))                             | 50                | $^\circ$                       |
| $b_{\min}$           | Bed elevation of $\phi_{\min}$ (Eq. (3))                          | –700              | m                              |
| $b_{\max}$           | Bed elevation of $\phi_{\max}$ (Eq. (3))                          | 500               | m                              |
| $W_{\max}$           | Maximal water thickness in till (Eq. (4))                         | 2                 | m                              |
| $C_d$                | Till water drainage rate (Eq. (4))                                | 7                 | $\text{mm yr}^{-1}$            |
| $N_0$                | Reference effective till pressure (Eq. (5))                       | 1,000             | Pa                             |
| $e_0$                | Reference void ratio at $N_0$ (Eq. (5))                           | 0.69              | –                              |
| $C_c$                | Till compressibility (Eq. (5))                                    | 0.12              | –                              |
| $\delta$             | Lower bound of $N$ , as fraction of overburden pressure (Eq. (5)) | 0.04              | –                              |
| $T_s$                | Temperature of snow precipitation                                 | 273.15            | K                              |
| $T_r$                | Temperature of rain precipitation                                 | 275.15            | K                              |
| $f_s$                | Degree-day factor for snow                                        | 3.3               | $\text{mm w.e. (PDD)}^{-1}$    |
| $f_i$                | Degree-day factor for ice                                         | 8.8               | $\text{mm w.e. (PDD)}^{-1}$    |
| $\Gamma$             | Atmospheric temperature lapse rate                                | –8.2              | $\text{K km}^{-1}$             |
| $C$                  | PICO overturning strength                                         | 1                 | $\text{Sv m}^3 \text{kg}^{-1}$ |
| $\gamma_T$           | PICO vertical heat exchange coefficient                           | $3 \cdot 10^{-5}$ | $\text{ms}^{-1}$               |
| $K$                  | Eigencalving coefficient                                          | $1 \cdot 10^{16}$ | ms                             |
| $H_{cr}$             | Thickness threshold for calving                                   | 50                | m                              |

PDD, positive degree-day.



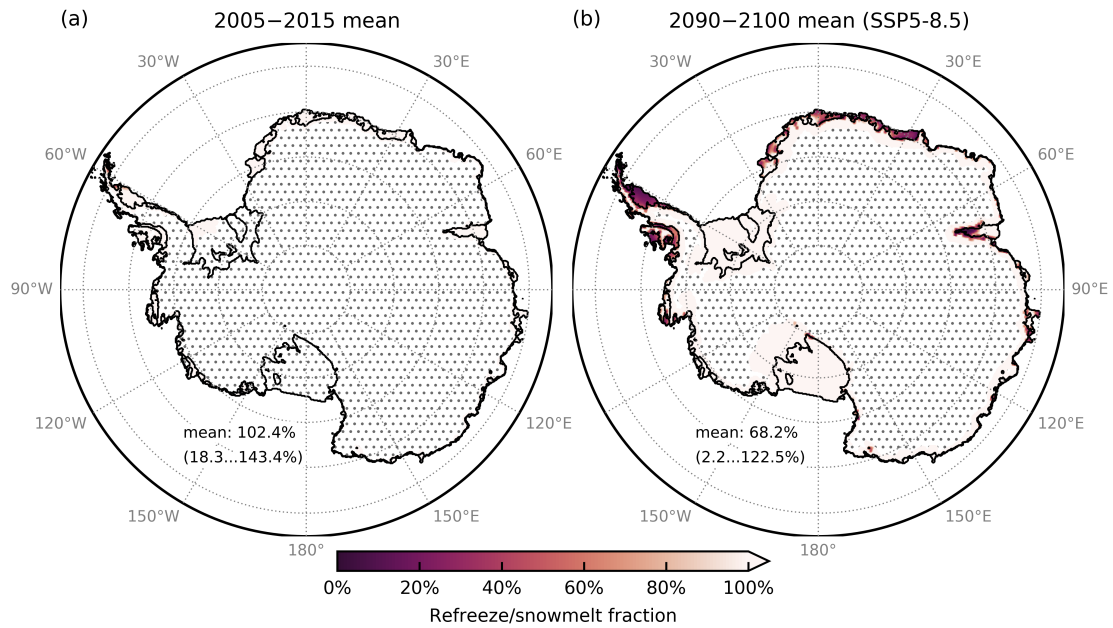

**Figure S1. Refreeze-per-melt fraction in RACMO.** Ratio of decadal mean refreezing and snow melt fluxes in RACMO2.3p2 (in percent) as an approximation for the refreeze fraction parameter  $\theta$  used in PISM-dEBM-simple, shown for present day (2005–2015 mean) (a) and the end of the century (2090–2100 mean), assuming an SSP5-8.5 warming scenario (b). Values given in each panel denote the mean and respective range (minimum–maximum), calculated over the ice shelves and masking all areas where annual mean surface melt is small ( $<10$  mm w.e.  $\text{yr}^{-1}$ ; hatched) in order to avoid numerical artifacts.

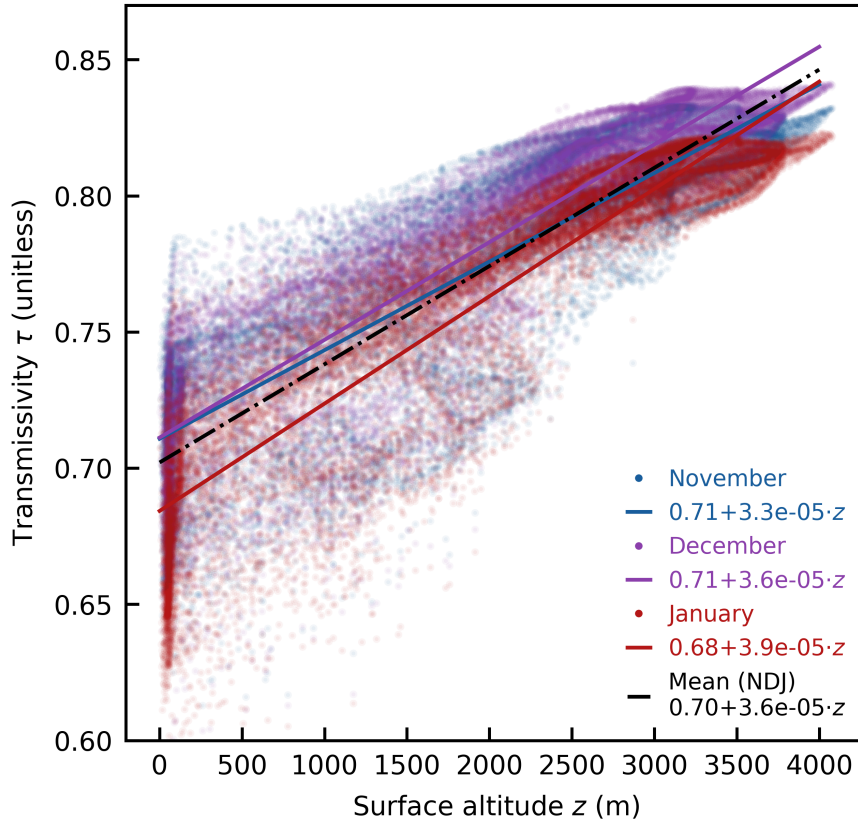

**Figure S2. Linear regression fit for the parameterization of atmospheric transmissivity.** Atmospheric transmissivity  $\tau$  (unitless) over the Antarctic Ice Sheet versus ice-sheet surface altitude  $z$  (in m), given by multi-year monthly means of RACMO2.3p2 data over the historical period (1950–2015) computed on RACMO’s native 27 km grid. The transmissivity is calculated from the ratio of incident shortwave solar radiation at the ice surface and the top of the atmosphere (TOA). A linear regression fit is shown for each of the three austral summer months with the highest average TOA insolation (November, December and January; NDJ) (colored solid lines) with best-fit parameters given in the legend. The transmissivity parameterization in dEBM-simple (Eq. (7)) uses best-fit parameters (intercept  $a_\tau = 0.70$  and slope  $b_\tau = 3.6 \cdot 10^{-5} \text{ m}^{-1}$ ) of the linear fit resulting from the mean over those three months (black dash-dotted line). Best-fit parameters from the November, December and January regression fits serve as uncertainty estimates in the model sensitivity ensemble (Sect. 5.4).

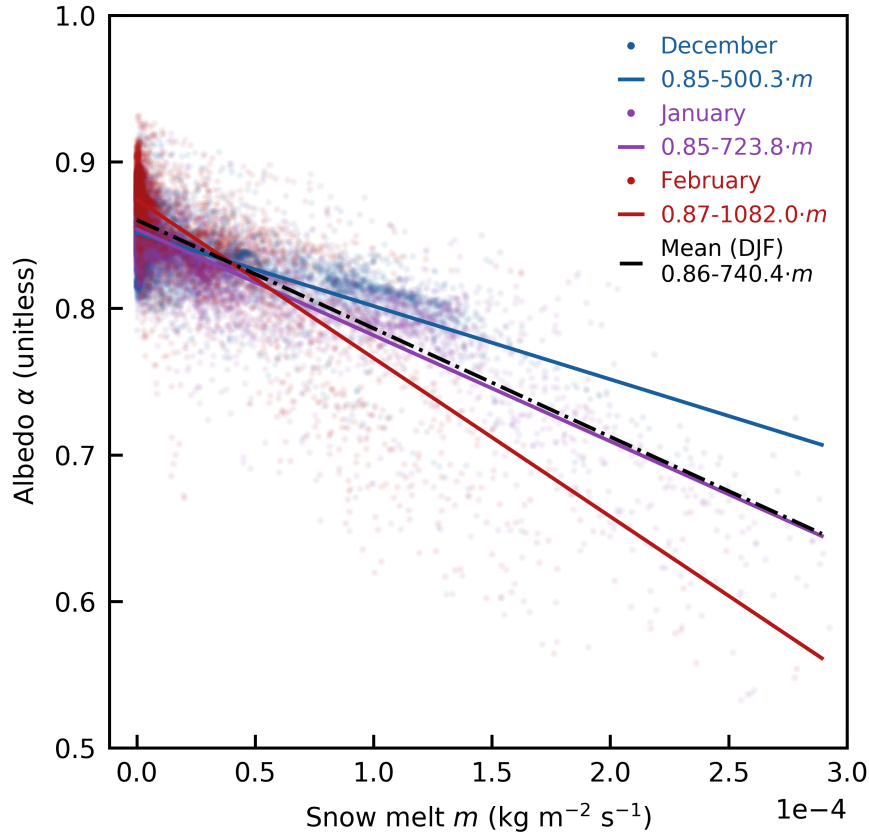

**Figure S3. Linear regression fit for the parameterization of surface albedo.** Antarctic surface albedo  $\alpha$  (unitless) versus snow melt  $m$  (in  $\text{kg m}^{-2} \text{s}^{-1}$ ), given by multi-year monthly means of RACMO2.3p2 data over the period 2085 to 2100 under the SSP5-8.5 warming scenario provided by CESM2, computed on RACMO’s native 27 km grid. A linear regression fit is shown for each of the three austral summer months with the highest average melt (December, January, February; DJF) (colored solid lines) with best-fit parameters given in the legend. The albedo parameterization in dEBM-simple (Eq. (8)) uses best-fit parameters (intercept  $a_\alpha = 0.86$  and slope  $b_\alpha = -740.4 (\text{kg m}^{-2} \text{s}^{-1})^{-1}$ ) of the linear fit resulting from the mean over those three months (black dash-dotted line). Best-fit parameters from the December, January and February regression fits serve as uncertainty estimates in the model sensitivity ensemble (Sect. 5.4). Grid cells where the mean albedo is below the allowed minimum value  $\alpha_{\min} = 0.47$  and grid cells which show melt even below the allowed minimum temperature  $T_{\min} = -10^\circ\text{C}$  have been masked before the fits.

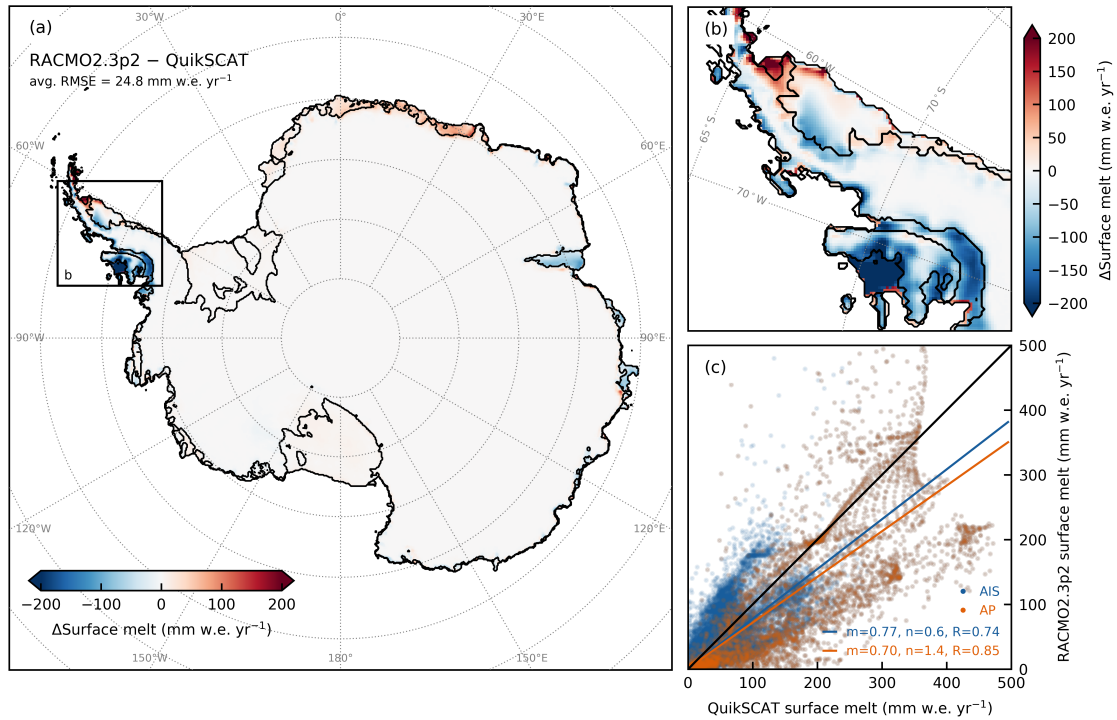

**Figure S4. Comparison of present-day (2000–2009) mean Antarctic surface melt rates from RACMO with satellite-based meltwater flux estimates.** (a) Map of Antarctic surface melt rate difference (in millimeters water equivalent per year,  $\text{mm w.e. yr}^{-1}$ ) between RACMO2.3p2-CESM2 and satellite-based meltwater flux estimates derived from QuikSCAT data (Trusel et al., 2013), average over the period 2000 to 2009. The root-mean-square error (RMSE), averaged across the entire ice sheet, is also given. (b) Same as panel (a), shown for a zoomed-in section of the Antarctic Peninsula, the region with the highest average melt rates, indicated by the black square in panel (a). (c) Scatter plot of RACMO versus QuikSCAT-based surface melt estimates (in  $\text{mm w.e. yr}^{-1}$ ) and linear regression fits of the data (colored solid lines). Blue data points correspond to the whole Antarctic Ice Sheet (AIS), orange data points to the zoomed-in section of the Antarctic Peninsula (AP) shown in panel (b).  $m$  and  $n$  are the slope and intercept of the regression lines, respectively, and  $R$  is the Pearson correlation coefficient. The black line marks the identity line.

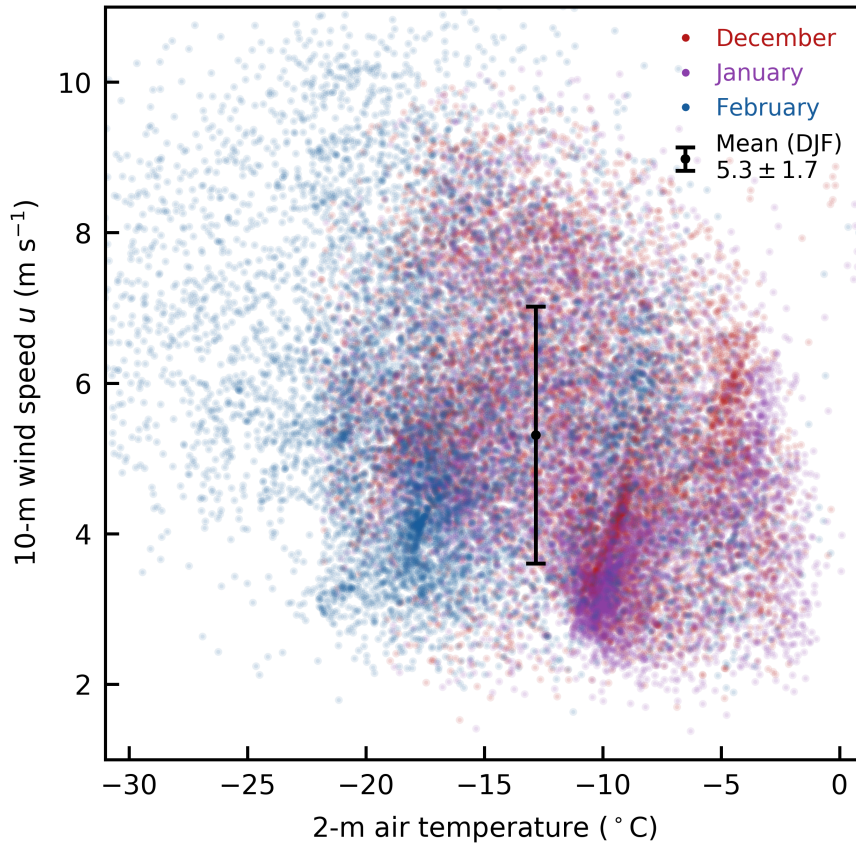

**Figure S5. Average summer wind speeds over the lower parts of the Antarctic Ice Sheet.** Wind speed at 10 m above ground  $u$  (in  $\text{m s}^{-1}$ ) during the austral summer months December, January and February (DJF) over the lower parts of the Antarctic Ice Sheet (elevations  $< 2000\text{m}$ ) versus near-surface (2 m) air temperature (in  $^{\circ}\text{C}$ ), given by multi-year monthly means of RACMO2.3p2 data over the historical period (1950–2015), computed on RACMO’s native 27 km grid. The black dot marks the DJF mean (value given in the legend) that is used in the estimation of the dEBM-simple tuning parameter  $c_1$  for the best-guess value. The error bars denote the standard deviation.

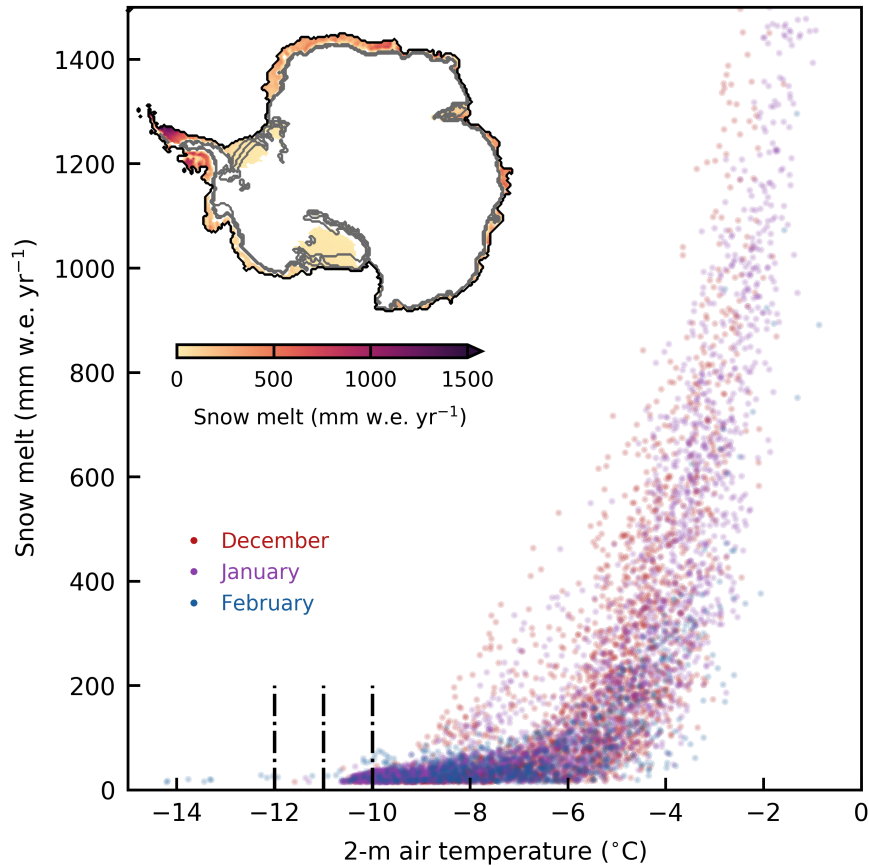

**Figure S6. Threshold temperature for melt.** Antarctic snow melt rates (in mm w.e. yr<sup>-1</sup>) as a function of near-surface air temperature (in °C), given by multi-year monthly means of RACMO2.3p2 data over the historical period (1950–2015) for the austral summer months with the highest average melt (December–February; DJF), computed on RACMO’s native 27 km grid. The black dash-dotted lines mark the temperature values that are used in the calibration as estimates of the threshold temperature  $T_{\min}$ , which constitutes the background melt condition in dEBM-simple. They mark the approximate long-term monthly mean temperature range above which significant surface melt occurs in the RACMO simulations. The inset shows a map of the spatial distribution of 1950 to 2015 multi-year mean DJF Antarctic snow melt rates from RACMO. The gray contour lines mark the  $-10$ ,  $-11$ ,  $-12$  °C isotherms of long-term mean summer air temperatures (1950–2015 DJF mean), respectively, that roughly approximate the mean extent of the melt area.

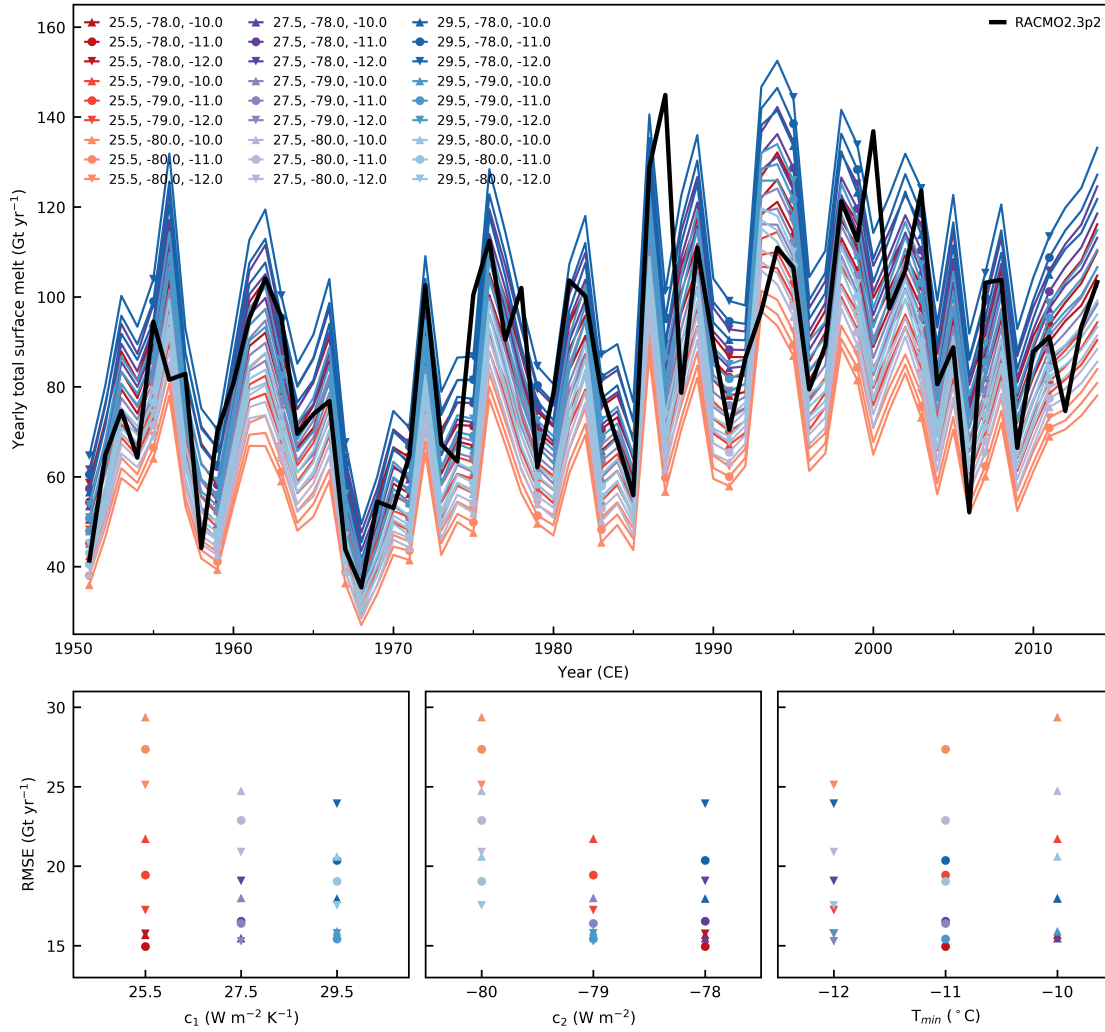

**Figure S7. Yearly total Antarctic surface melt in the historical model calibration ensemble.** Upper panel shows the evolution of Antarctic-wide integrated yearly total surface melt flux (in gigatons per year,  $\text{Gt yr}^{-1}$ ) as calculated with PISM-dEBM-simple in the historical (1950–2015) model calibration ensemble using a fixed geometry (colored lines). The number tuples in the legend are  $\{c_1$  (in  $\text{W m}^{-2} \text{K}^{-1}$ ),  $c_2$  (in  $\text{W m}^{-2}$ ),  $T_{\min}$  (in  $^{\circ}\text{C}$ )}. The black line shows the yearly total surface melt flux derived with RACMO2.3p2 under boundary forcing from CESM2, bilinearly regridded to PISM’s 8 km grid using a common surface mask. Lower panels show the respective temporal root-mean-square error (RMSE, in  $\text{Gt yr}^{-1}$ ) of each model ensemble member with respect to RACMO, individually plotted against  $c_1$  (left),  $c_2$  (middle), and  $T_{\min}$  (right).

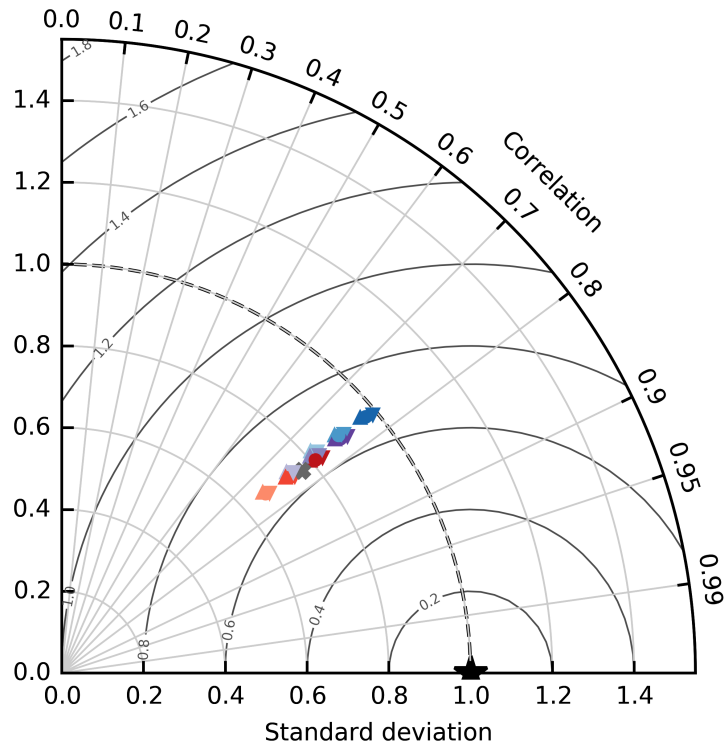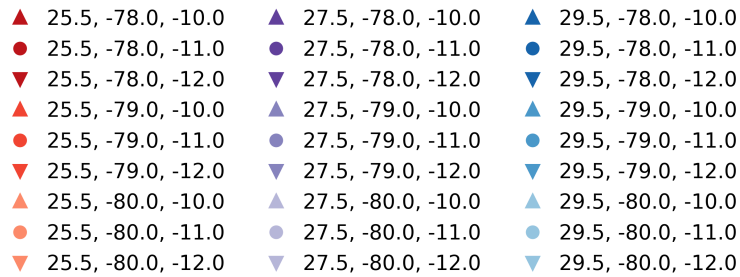

**Figure S8. Taylor diagram summarizing the performance of the historical model calibration ensemble.** The diagram shows a summary of the performance of each ensemble member from the historical model calibration ensemble (colored markers; legend entries as in Fig. S7) compared to the Antarctic-wide integrated yearly total surface melt flux from RACMO2.3p2 (black pentagram). The horizontal and vertical axes represent the standard deviation, normalized with respect to the standard deviation of the RACMO surface melt flux (bold dashed black line). The azimuthal angle shows the correlation between the individual ensemble members and RACMO, given by the Pearson correlation coefficient. Finally, the (normalized) centered root-mean-square error, representing a bias-corrected equivalent of the root-mean-square error, is given by the circular dark gray contour lines. The gray cross marker shows the performance of PISM using the standard PDD scheme for comparison.



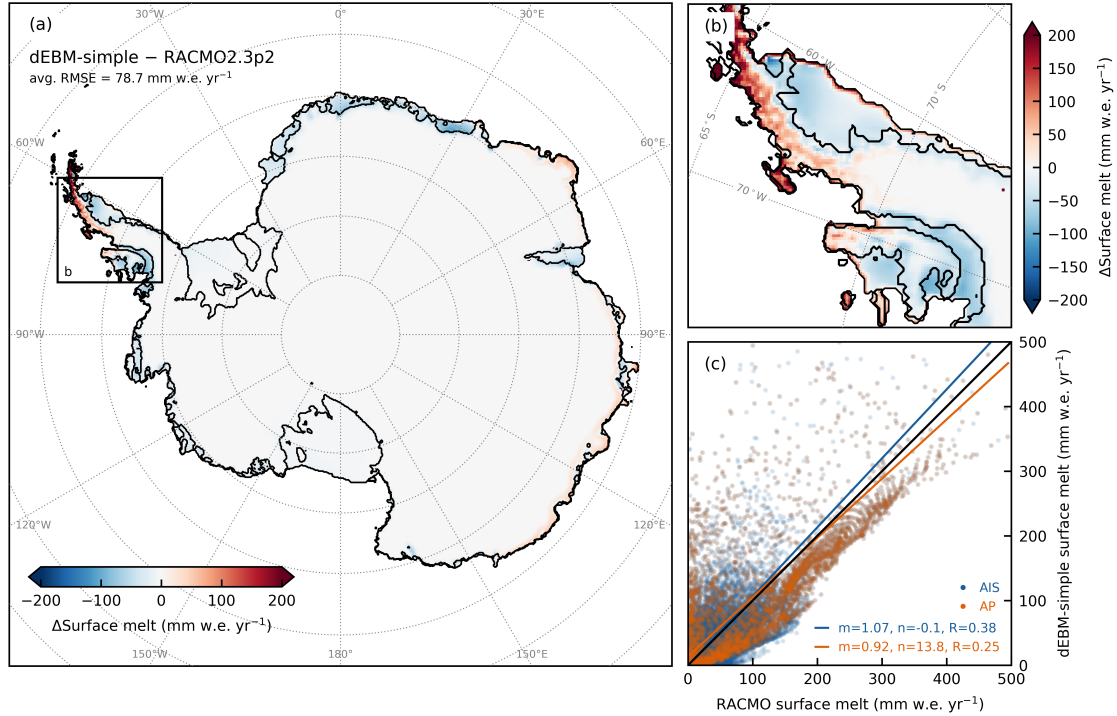

**Figure S9. Comparison of historical (1950–2015 mean) Antarctic surface melt rates between dEBM-simple and RACMO.** (a) Map of absolute difference of dEBM-simple minus RACMO-computed surface melt rates (in mm w.e. yr<sup>-1</sup>), averaged over the historical period (1950–2015). The root-mean-square error (RMSE), averaged across the entire ice sheet, is also given. (b) Zoomed-in section of the Antarctic Peninsula, the region with the highest average melt rates, indicated by the black square in panel (a). (c) Scatter plot of dEBM-simple versus RACMO-computed surface melt rates (in mm w.e. yr<sup>-1</sup>) and linear regression fits of the data (colored solid lines). Blue data points correspond to the whole Antarctic Ice Sheet (AIS), orange data points to the zoomed-in section of the Antarctic Peninsula (AP) shown in panel (b).  $m$  and  $n$  are the slope and intercept of the regression lines, respectively, and  $R$  is the Pearson correlation coefficient. The black line marks the identity line.

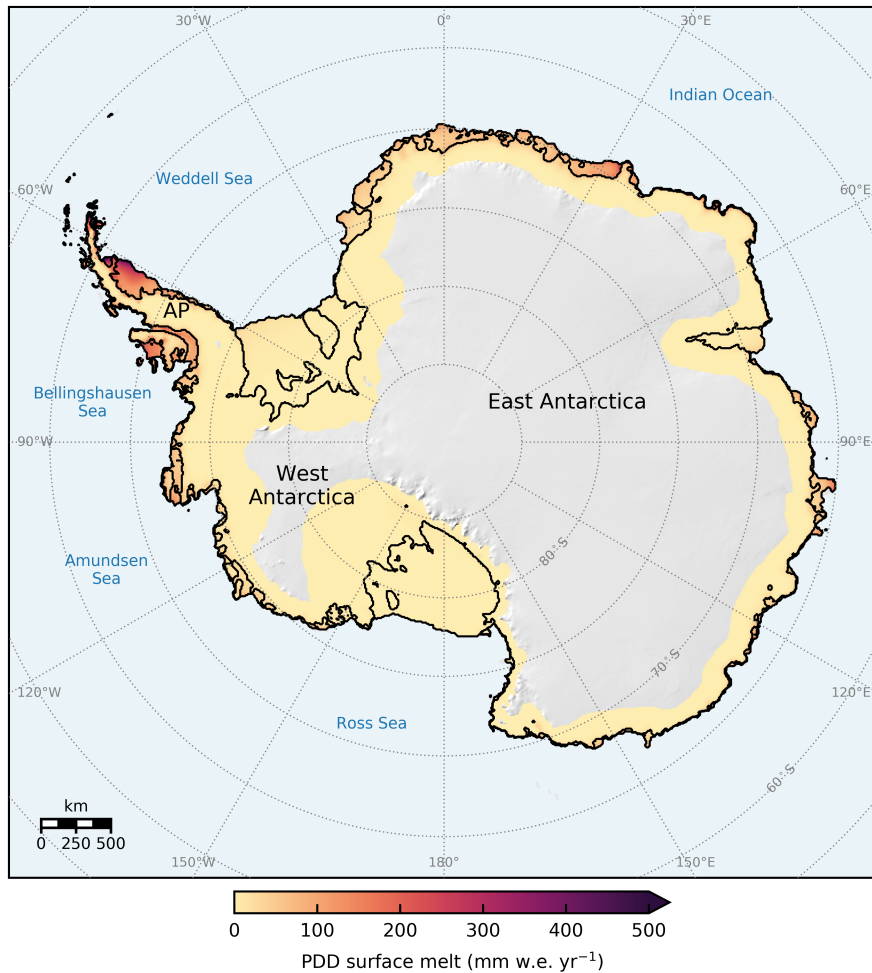

**Figure S10. Present-day (2005–2015 mean) Antarctic surface melt rates computed with PISM using PDD.** Map of Antarctic surface melt rates (in mm w.e. yr<sup>-1</sup>), as calculated with PISM using a standard PDD scheme, averaged over the period 2005 to 2015. Areas with melt rates below numerical significance (<0.001 mm w.e. yr<sup>-1</sup>) are masked. AP, Antarctic Peninsula.

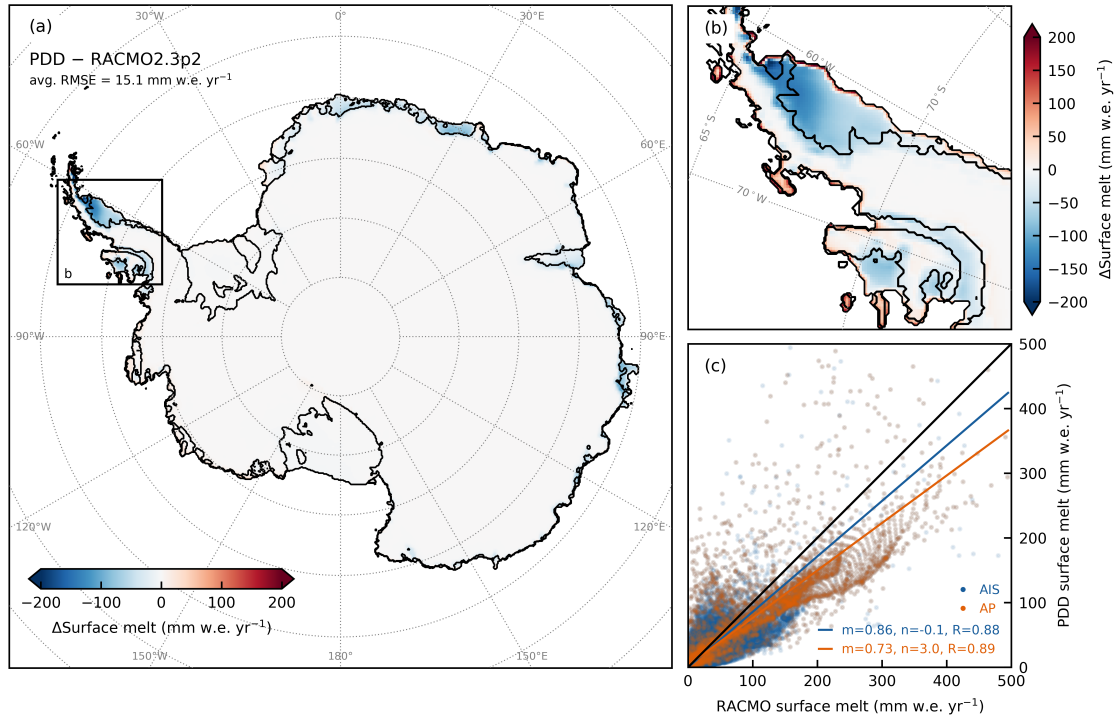

**Figure S11. Comparison of historical (1950–2015 mean) Antarctic surface melt rates between PDD and RACMO.** Same as Fig. S9, but for PISM using a standard PDD melt scheme. **(a)** Map of absolute difference of PDD minus RACMO-computed surface melt rates (in  $\text{mm w.e. yr}^{-1}$ ), averaged over the historical period (1950–2015). The root-mean-square error (RMSE), averaged across the entire ice sheet, is also given. **(b)** Zoomed-in section of the Antarctic Peninsula, the region with the highest average melt rates, indicated by the black square in panel (a). **(c)** Scatter plot of PDD versus RACMO-computed surface melt rates (in  $\text{mm w.e. yr}^{-1}$ ) and linear regression fits of the data (colored solid lines). Blue data points correspond to the whole Antarctic Ice Sheet (AIS), orange data points to the zoomed-in section of the Antarctic Peninsula (AP) shown in panel (b).  $m$  and  $n$  are the slope and intercept of the regression lines, respectively, and  $R$  is the Pearson correlation coefficient. The black line marks the identity line.

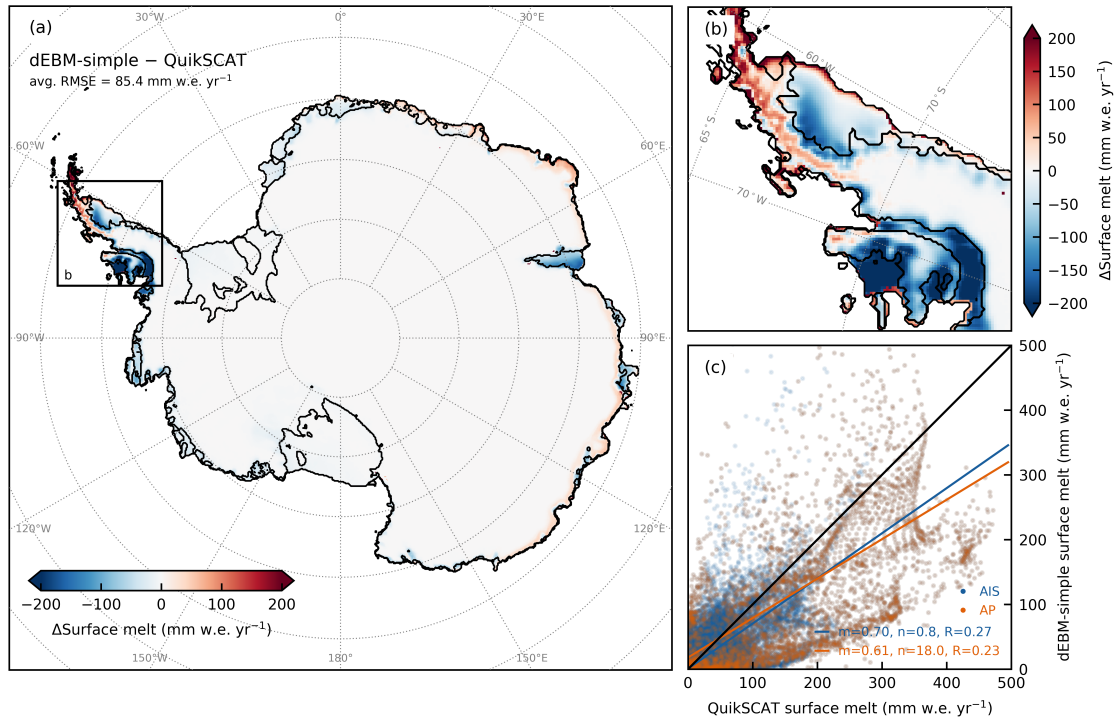

**Figure S12. Comparison of present-day (2000–2009 mean) Antarctic surface melt rates from dEBM-simple with satellite-based meltwater flux estimates.** (a) Map of Antarctic surface melt rate difference (in mm w.e. yr<sup>-1</sup>) between PISM-dEBM-simple and satellite-based meltwater flux estimates derived from QuikSCAT data (Trusel et al., 2013), average over the period 2000 to 2009. The root-mean-square error (RMSE), averaged across the entire ice sheet, is also given. (b) Same as panel (a), shown for a zoomed-in section of the Antarctic Peninsula, the region with the highest average melt rates, indicated by the black square in panel (a). (c) Scatter plot of dEBM-simple versus QuikSCAT-based surface melt estimates (in mm w.e. yr<sup>-1</sup>) and linear regression fits of the data (colored solid lines). Blue data points correspond to the whole Antarctic Ice Sheet (AIS), orange data points to the zoomed-in section of the Antarctic Peninsula (AP) shown in panel (b).  $m$  and  $n$  are the slope and intercept of the regression lines, respectively, and  $R$  is the Pearson correlation coefficient. The black line marks the identity line.

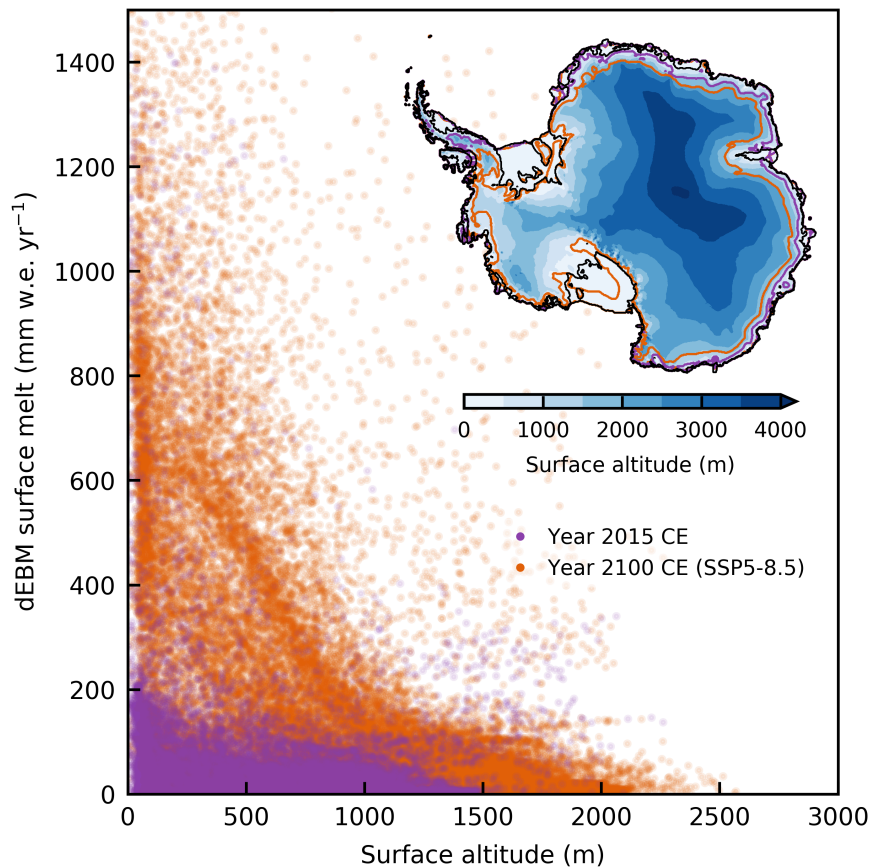

**Figure S13. Surface melt rates as a function of the ice-sheet surface altitude.** Antarctic surface melt rates (in mm w.e. yr<sup>-1</sup>) over the grounded parts of the ice sheet as computed with PISM-dEBM-simple, shown as a function of ice-sheet surface altitude for present day (year 2015; purple data points) and the year 2100, assuming an SSP5-8.5 atmospheric warming scenario (orange data points). The inset map shows the maximum extent of the melt area at the two respective times as colored contours, overlaid on the present-day ice-sheet surface altitude (contour levels of 500 m).

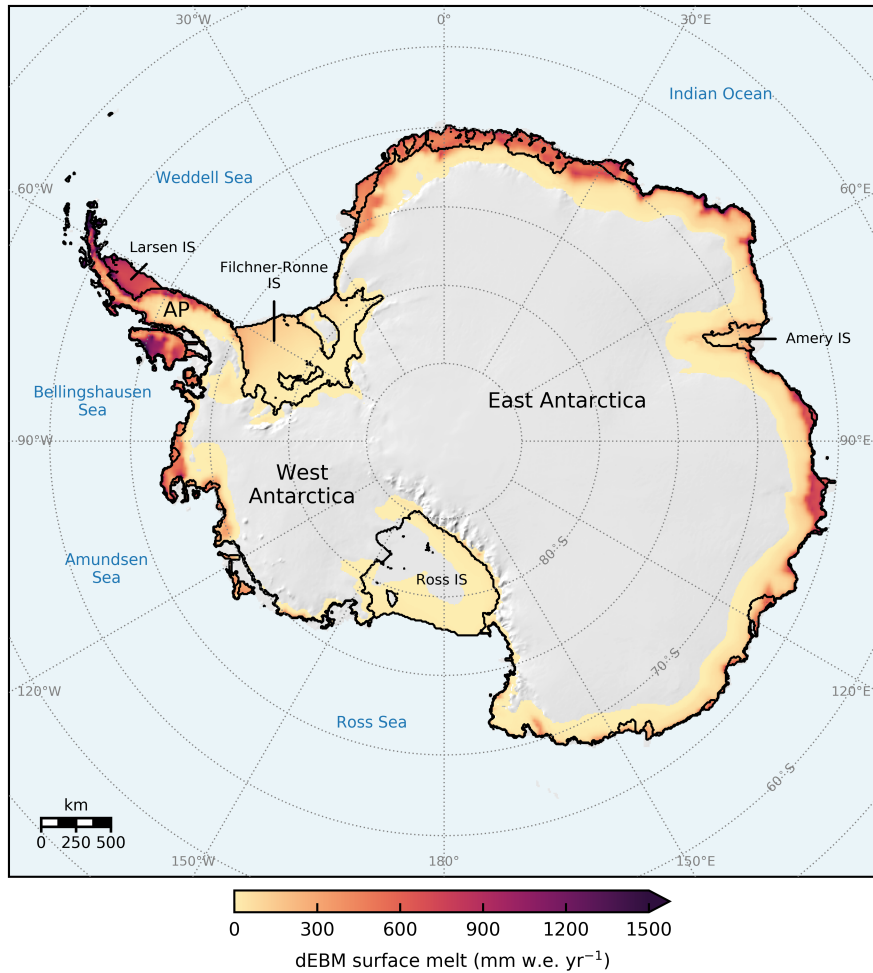

**Figure S14. End-of-century (2090–2100 mean) Antarctic surface melt rates computed by dEBM-simple.** Map of Antarctic surface melt rates (in mm w.e. yr<sup>-1</sup>), as calculated with PISM-dEBM-simple in the calibrated 21<sup>st</sup>-century projection run forced by RACMO2.3p2 with atmospheric boundary forcing from CESM2 and following an SSP5-8.5 warming scenario, averaged over the period 2090 to 2100. Areas with melt rates below numerical significance (<0.001 mm w.e. yr<sup>-1</sup>) are masked. AP, Antarctic Peninsula. Note that the axis limits are different from those in Fig. 2a.

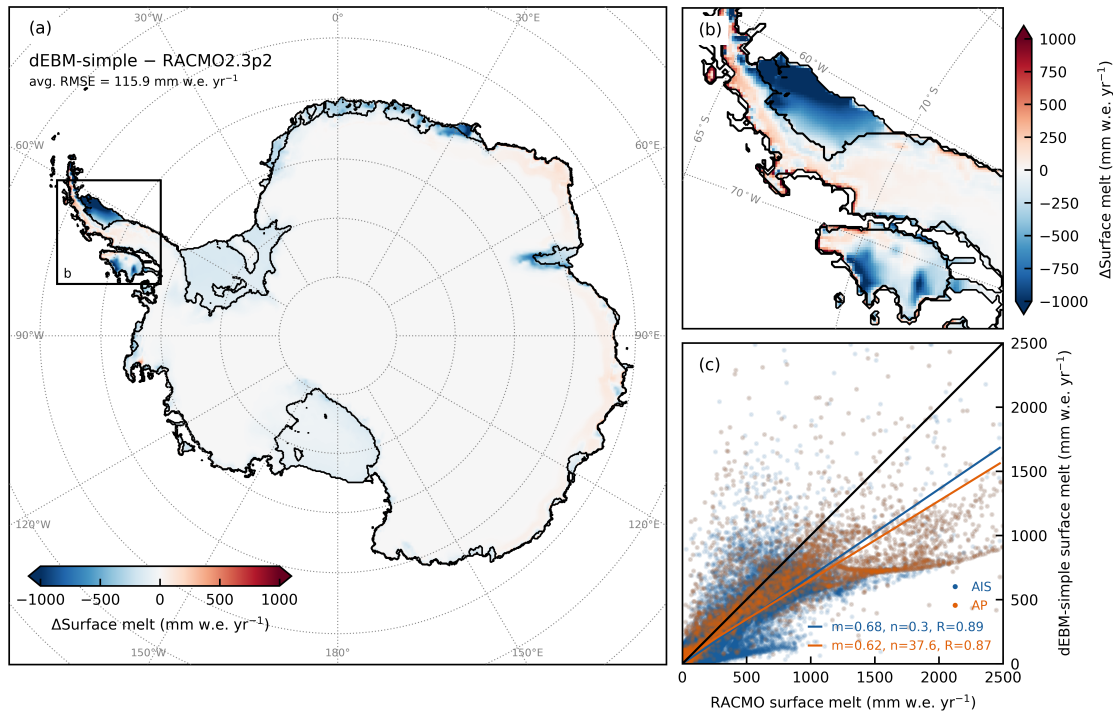

**Figure S15. Comparison of end-of-century (2090–2100 mean) Antarctic surface melt rates between dEBM-simple and RACMO.** (a) Map of absolute difference of dEBM-simple minus RACMO-computed surface melt rates (in mm w.e. yr<sup>-1</sup>) as calculated with PISM-dEBM-simple in the calibrated 21<sup>st</sup>-century projection run forced by RACMO2.3p2 with atmospheric boundary forcing from CESM2 and following an SSP5-8.5 warming scenario, averaged over the period 2090 to 2100. The root-mean-square error (RMSE), averaged across the entire ice sheet, is also given. (b) Zoomed-in section of the Antarctic Peninsula, the region with the highest average melt rates, indicated by the black square in panel (a). (c) Scatter plot of dEBM-simple versus RACMO-computed surface melt rates (in mm w.e. yr<sup>-1</sup>) and linear regression fits of the data (colored solid lines). Blue data points correspond to the whole Antarctic Ice Sheet (AIS), orange data points to the zoomed-in section of the Antarctic Peninsula (AP) shown in panel (b).  $m$  and  $n$  are the slope and intercept of the regression lines, respectively, and  $R$  is the Pearson correlation coefficient. The black line marks the identity line. Note that the axis limits in all panels are different from those in Fig. S9.

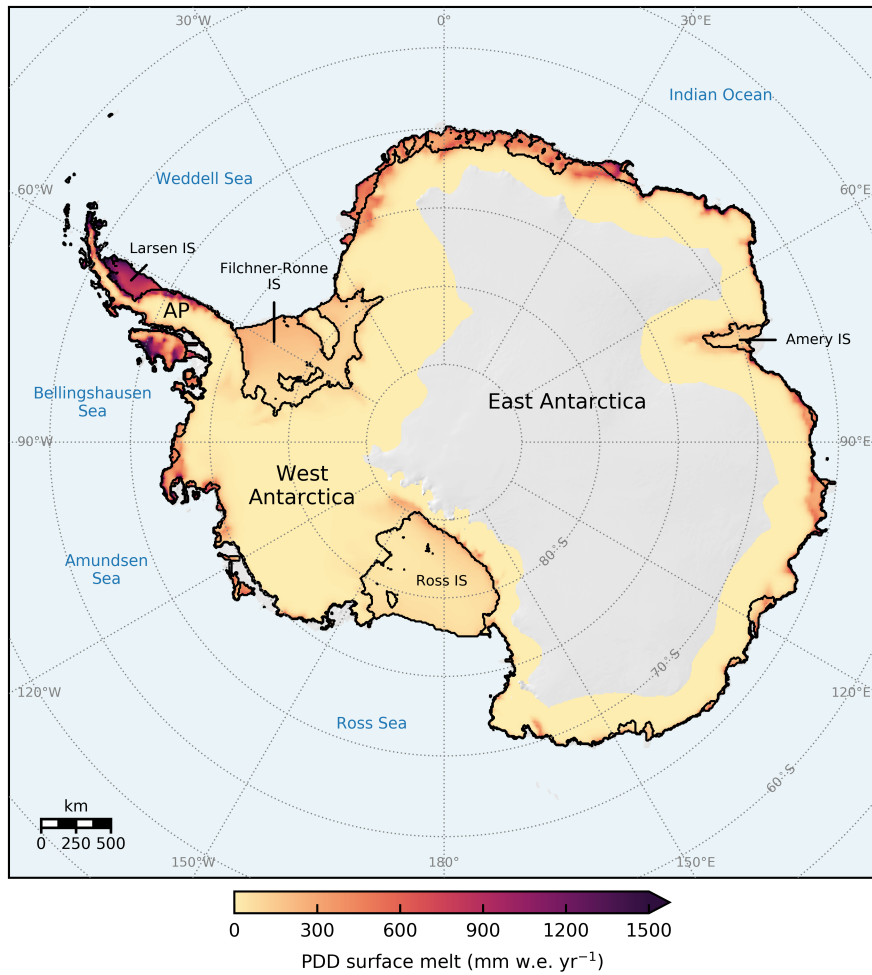

**Figure S16.** End-of-century (2090–2100 mean) Antarctic surface melt rates computed with PISM using PDD. Same as Fig. S14, but computed with PISM using a standard PDD melt scheme.



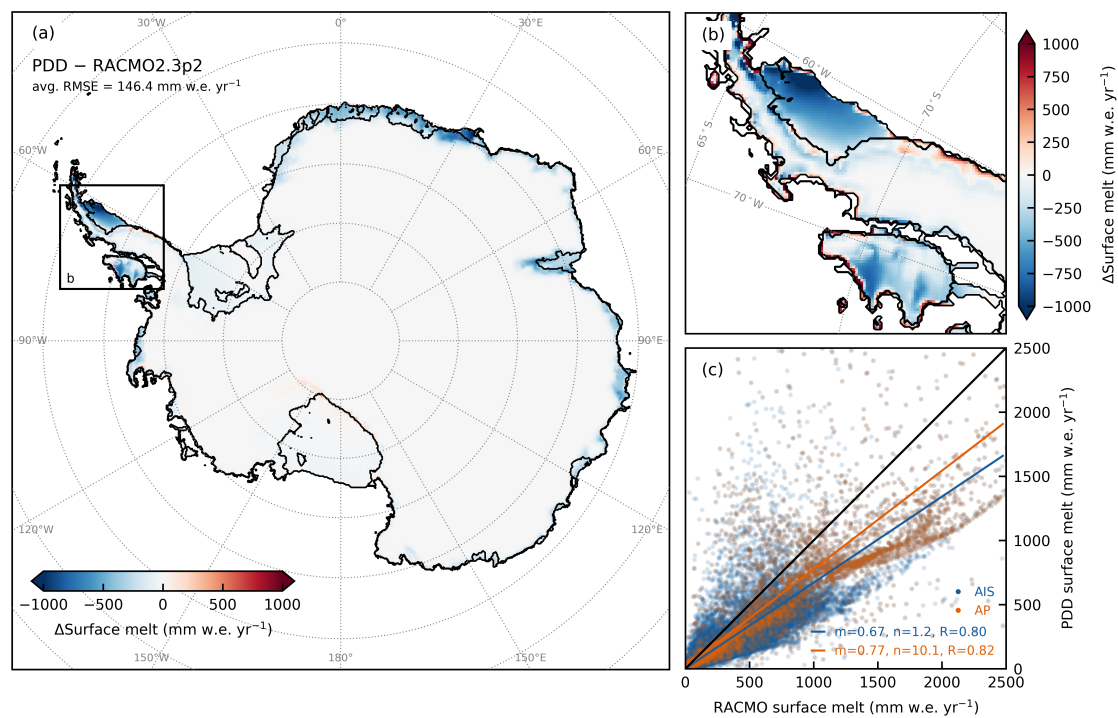

**Figure S17. Comparison of end-of-century (2090–2100 mean) Antarctic surface melt rates between PDD and RACMO.** Same as Fig. S16, but computed with PISM using a standard PDD melt scheme.

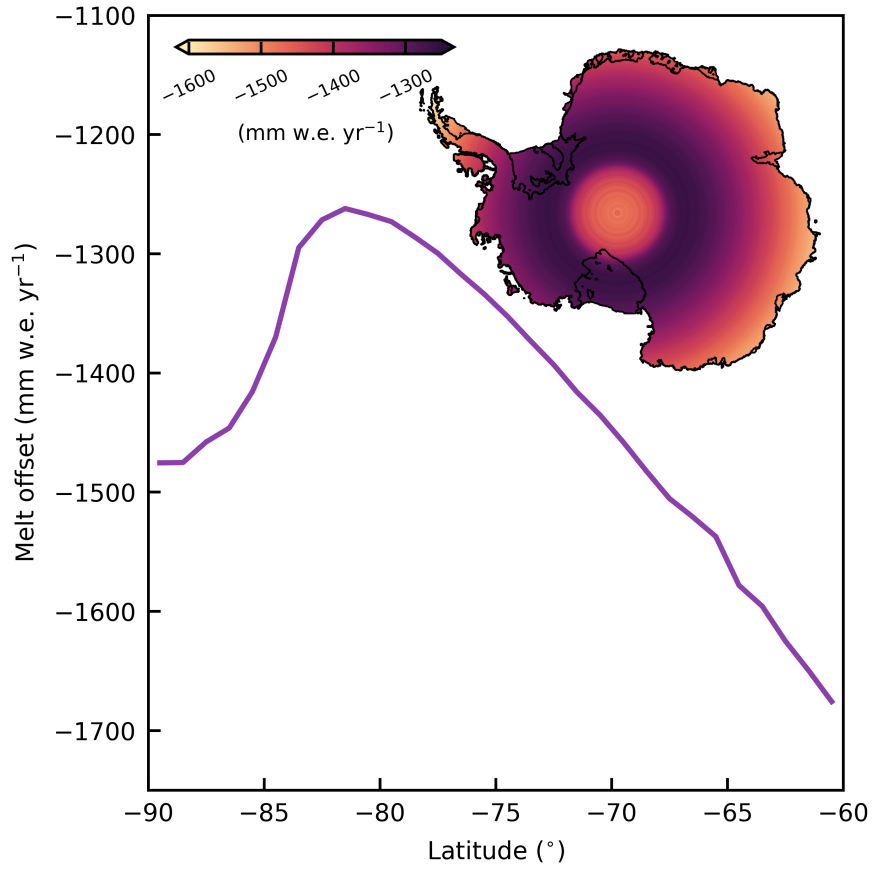

**Figure S18. Melt offset  $M_{\text{off}}$ .** Annual average (negative) surface melt potential  $M_{\text{off}} \propto c_2$  (in mm w.e. yr<sup>-1</sup>) resulting from outgoing long-wave radiation (third term in Eq. (6)), which acts as a negative offset to the total surface melt flux, as a function of latitude. Inset map shows the spatial distribution.

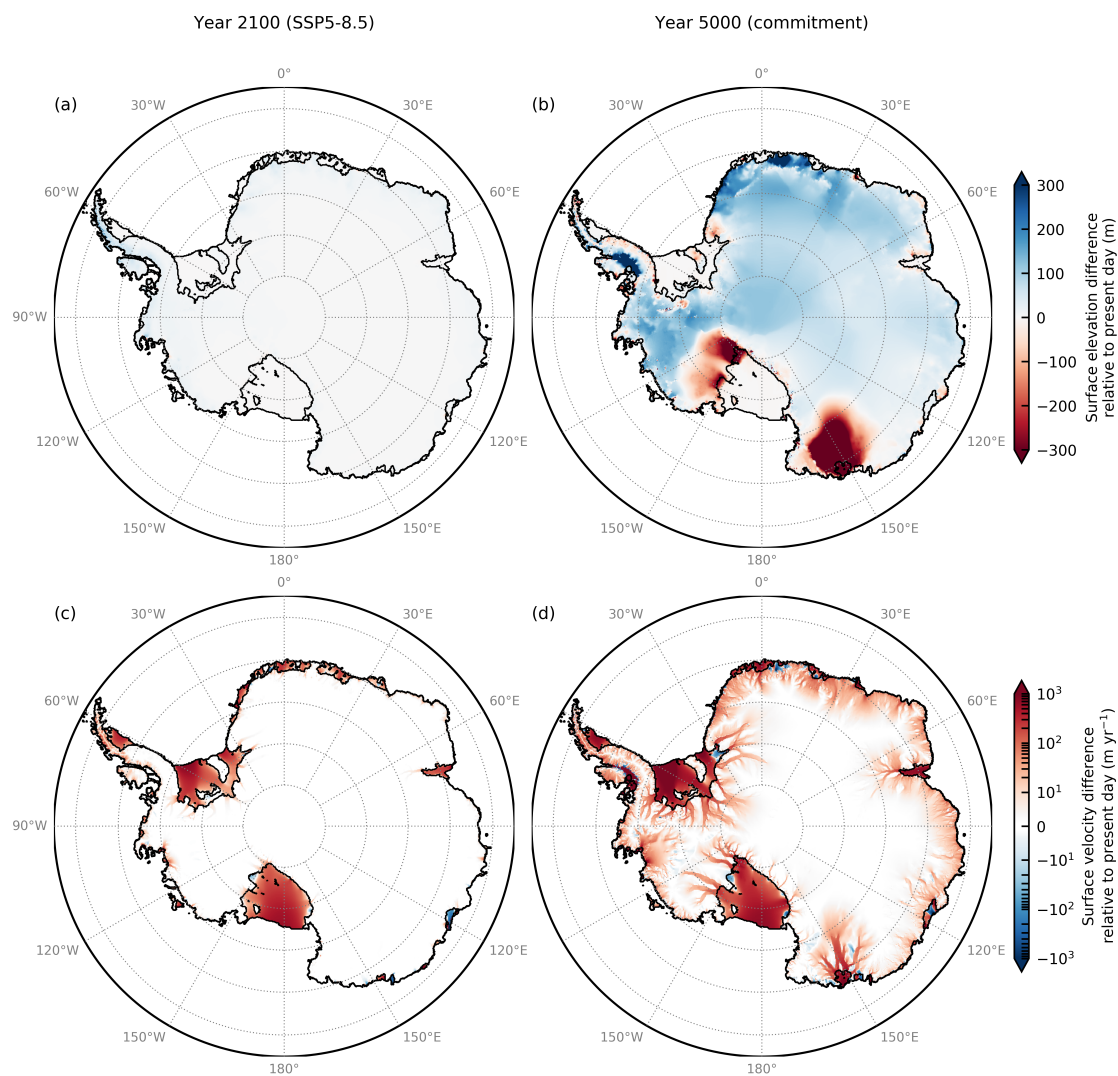

**Figure S19. Committed dynamical changes in Antarctica resulting from enhanced surface melting.** Same as Fig. 6, but assuming a constant refreeze fraction of  $\theta = 0.9$ . Shown is the difference in ice-sheet surface elevation (in m) as modeled with PISM-dEBM-simple under SSP5-8.5 forcing from RACMO2.3p2 compared to a control simulation run under present day (1986–2015 mean) conditions (a) in 2100 and (b) under sustained end-of-century (2090–2100 monthly mean) climate conditions in the year 5000. (c–d) Same as panels (a–b), but for ice surface velocity (in  $\text{m yr}^{-1}$ ).

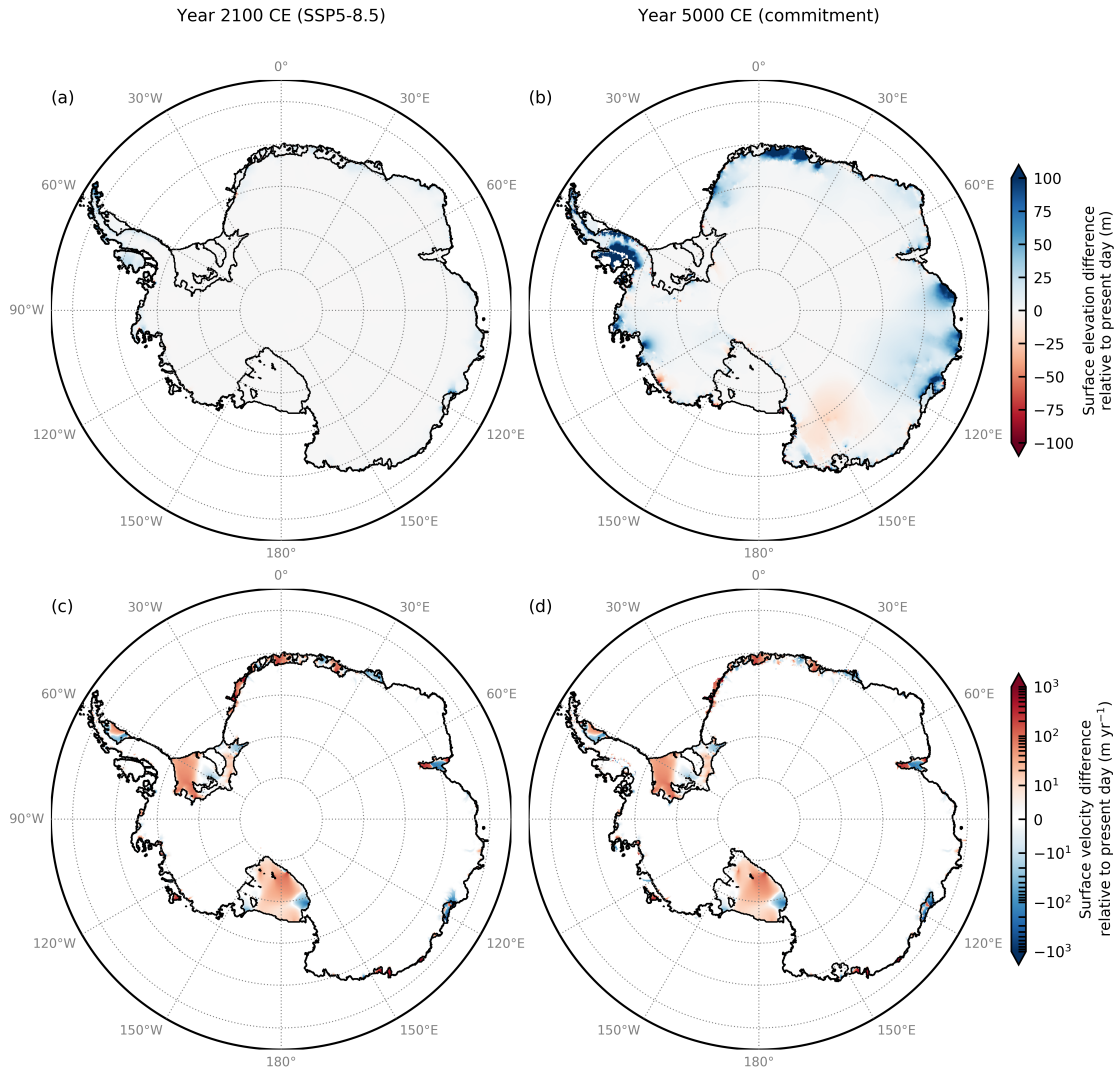

**Figure S20. Uncertainty of committed dynamical changes in Antarctica resulting from enhanced surface melting.** Difference between committed ice-dynamical changes with respect to present day assuming a constant refreeze fraction of  $\theta = 0.9$  (i.e., Fig. S19) minus committed ice-dynamical changes assuming a constant refreeze fraction of  $\theta = 0.5$  (i.e., Fig. 6). Variables and units as in Fig. 6, but note the different range of the color scale in panels (a) and (b).

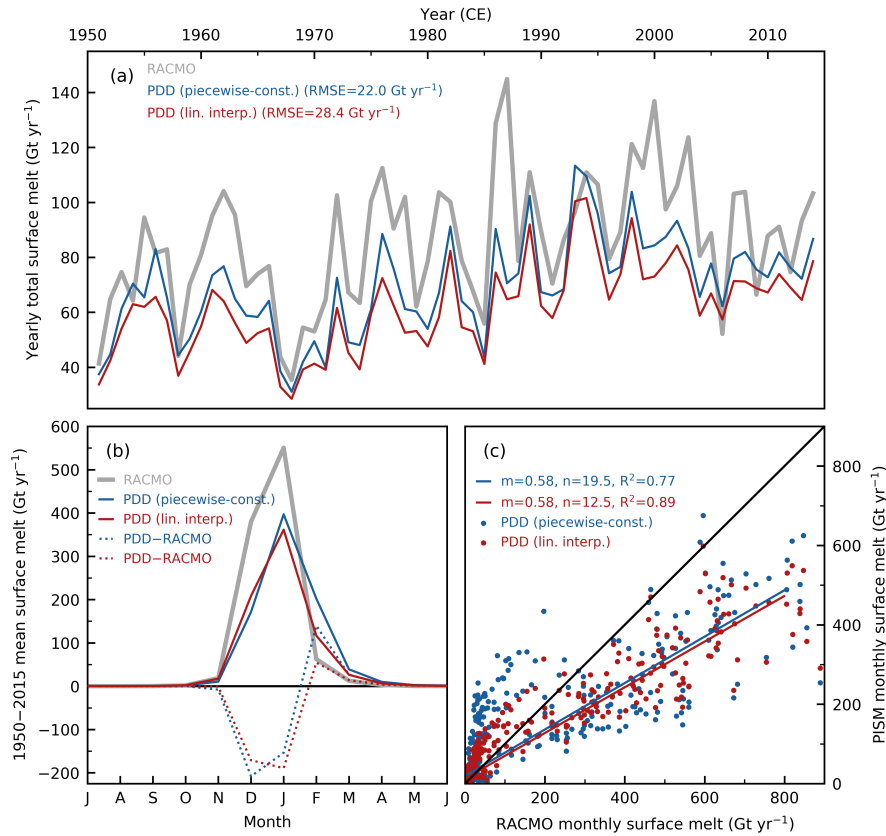

**Figure S21. Impacts of temperature forcing treatment on PDD-derived melt.** Same as Fig. 1, but comparing RACMO-derived melt fluxes with PDD-derived melt fluxes with and without applying a linear interpolation between the monthly air temperature forcing inputs in PISM. (a) Antarctic-wide integrated 1950 to 2015 yearly total surface melt flux (in gigatons per year, Gt yr<sup>-1</sup>) as calculated with a standard PDD melt scheme using piecewise-constant temperature forcings (blue line; default) and linearly interpolating between the monthly temperature inputs (red line). The light gray line shows the yearly melt flux predicted by RACMO2.3p2. The root-mean-square errors (RMSE) of yearly total melt fluxes with respect to RACMO are given in parentheses. (b) Multi-year monthly averaged annual melt cycle (in Gt yr<sup>-1</sup>) for PDD with piecewise-constant (blue) and linearly interpolated (red) monthly temperature inputs compared to RACMO (solid light gray line). The dotted lines show the respective differences between PDD and RACMO. (c) Total monthly surface melt fluxes from PDD with piecewise-constant (blue) and linearly interpolated (red) temperature inputs in comparison to RACMO melt fluxes (in Gt yr<sup>-1</sup>) and linear regression fit of the data (colored solid lines).  $m$  and  $n$  are the slope and intercept of the regression lines, respectively, and  $R^2$  the coefficient of determination. The black line marks the identity line.

## References

Trusel, L. D., Frey, K. E., Das, S. B., Munneke, P. K., and Broeke, M. R.: Satellite-based estimates of Antarctic surface meltwater fluxes, *Geophysical Research Letters*, 40, 6148–6153, 2013.
